# Supplementary material for: Ancient Human Migration after Out-of-Africa
Source: PubMed Central journal article supplement (PMC4876373; doi:10.1038/srep26565), 2016-05-23
Supplement: srep26565-s1.pdf [file srep26565-s1.pdf]

# **Ancient Human Migration after Out-of-Africa**

**Daniel Shriner, Fasil Tekola-Ayele, Adebawale Adeyemo, Charles N. Rotimi**

Supplementary Figures S1–S4

Supplementary Text

Supplementary Tables S1 and S2

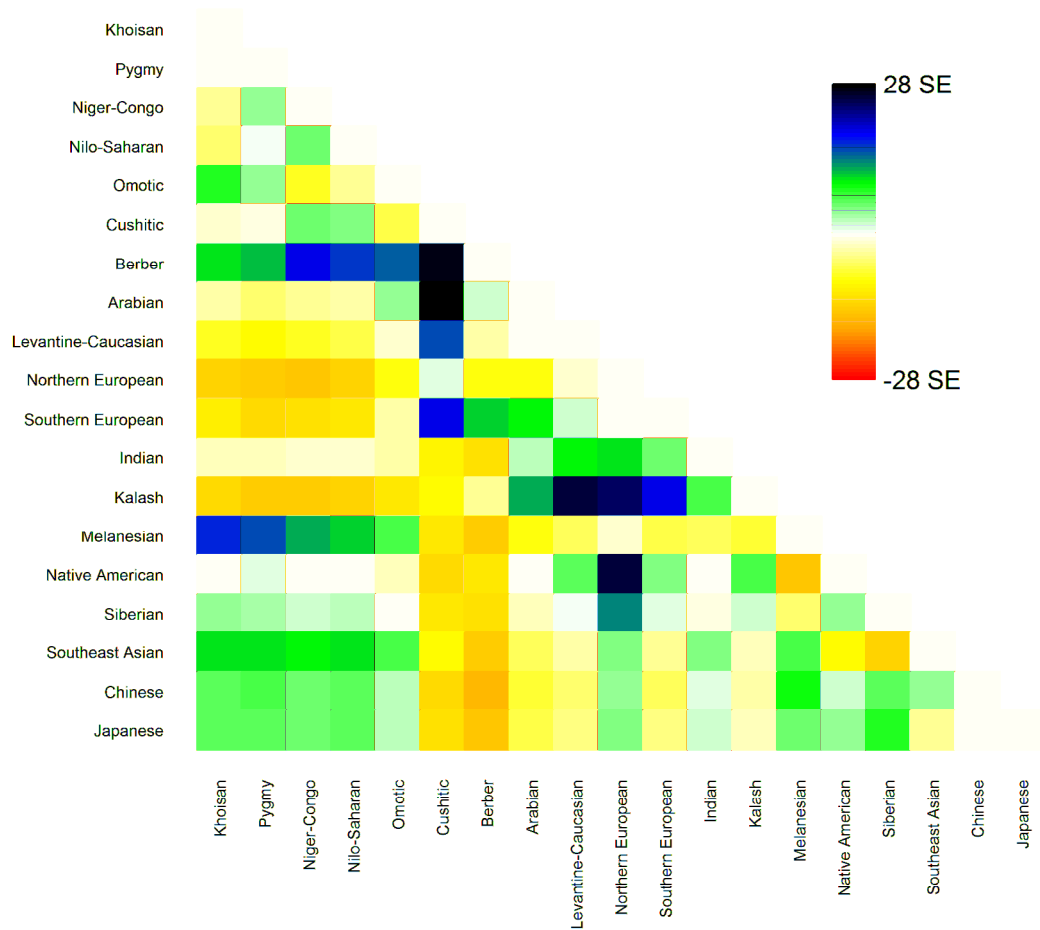

Supplementary Figure S1A. Residual plot corresponding to Figure 2.

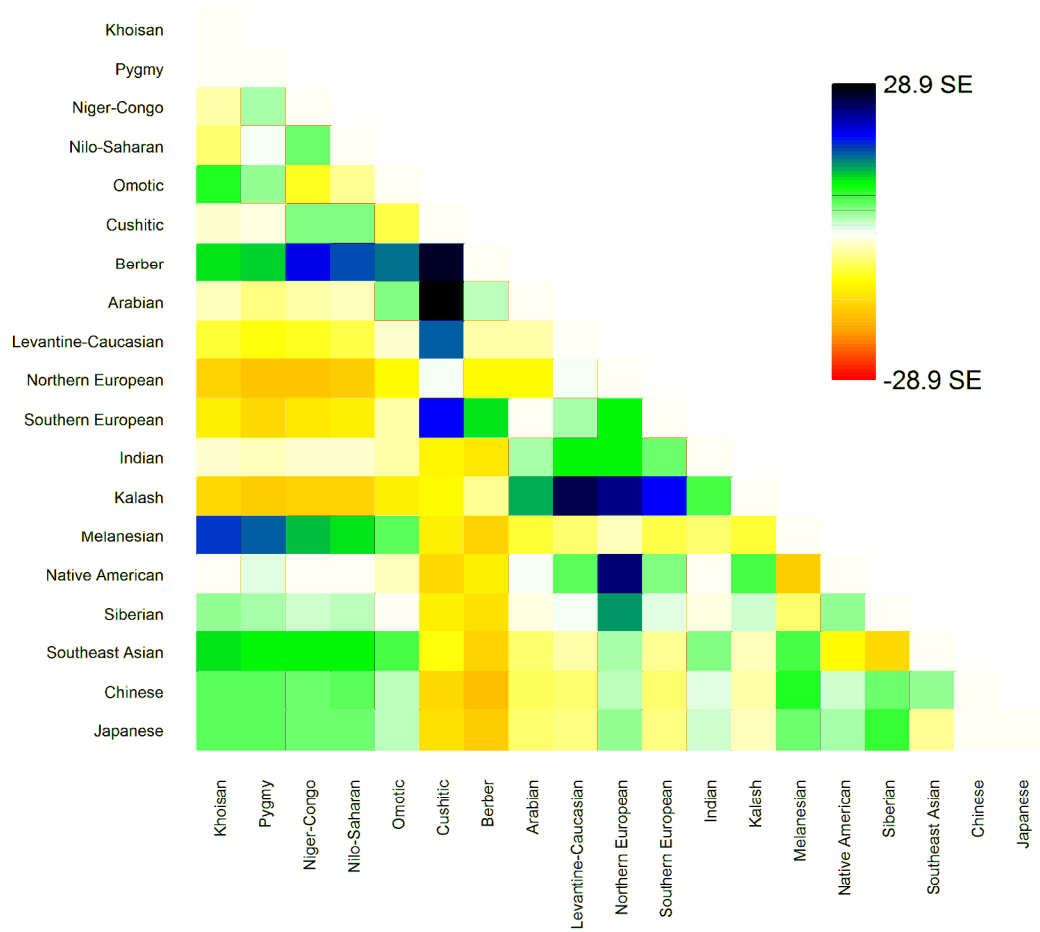

Supplementary Figure S1B. Residual plot corresponding to Figure 3.

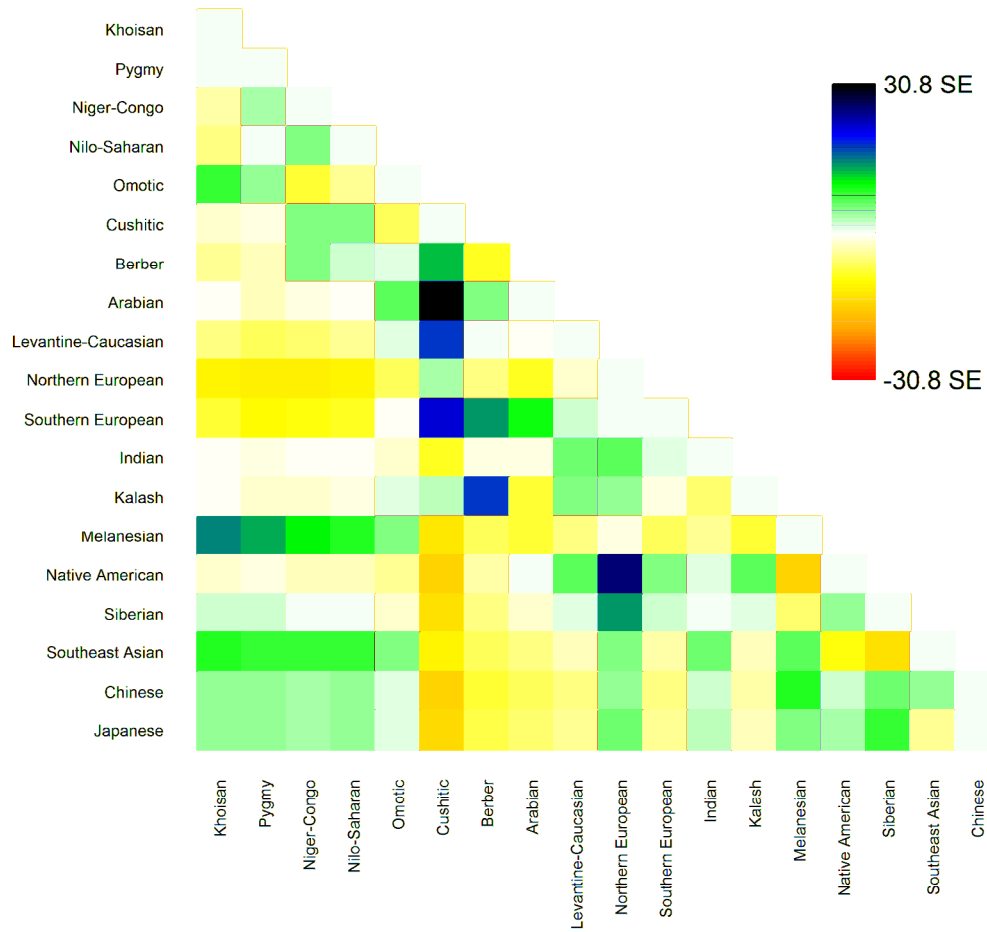

Supplementary Figure S1C. Residual plot corresponding to Figure 4.

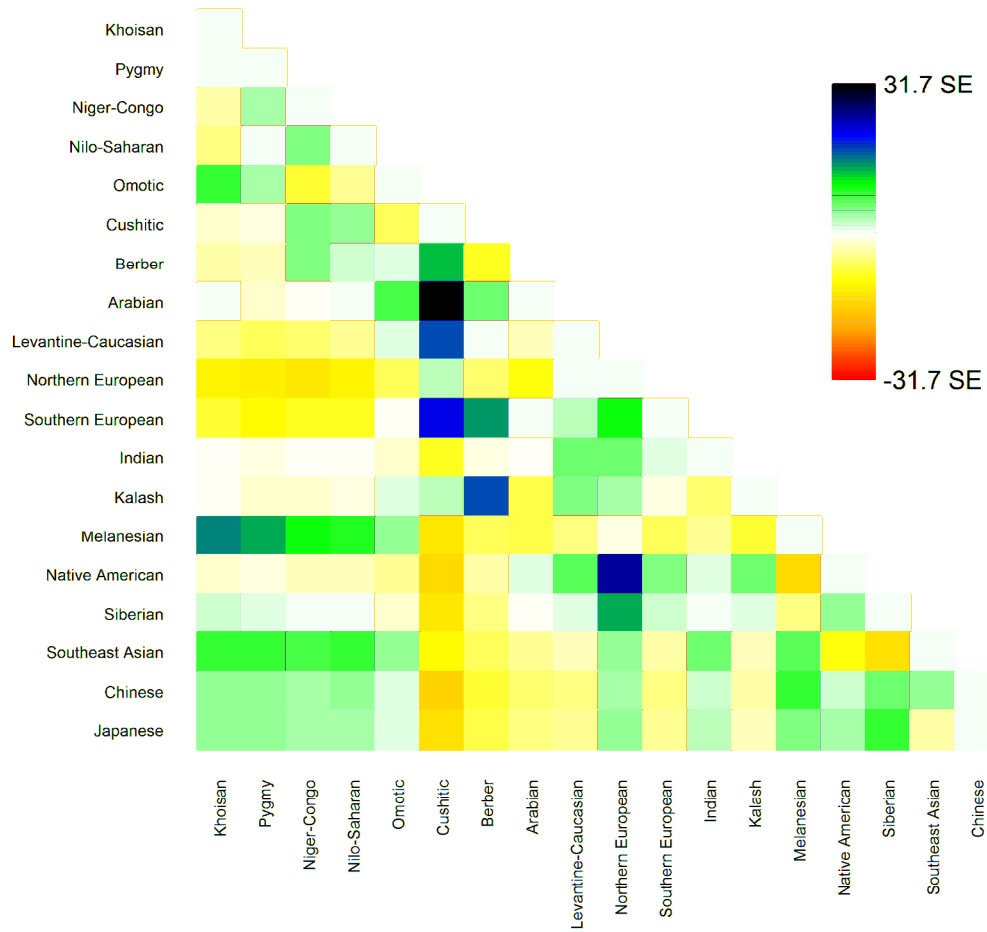

Supplementary Figure S1D. Residual plot corresponding to Figure 5.

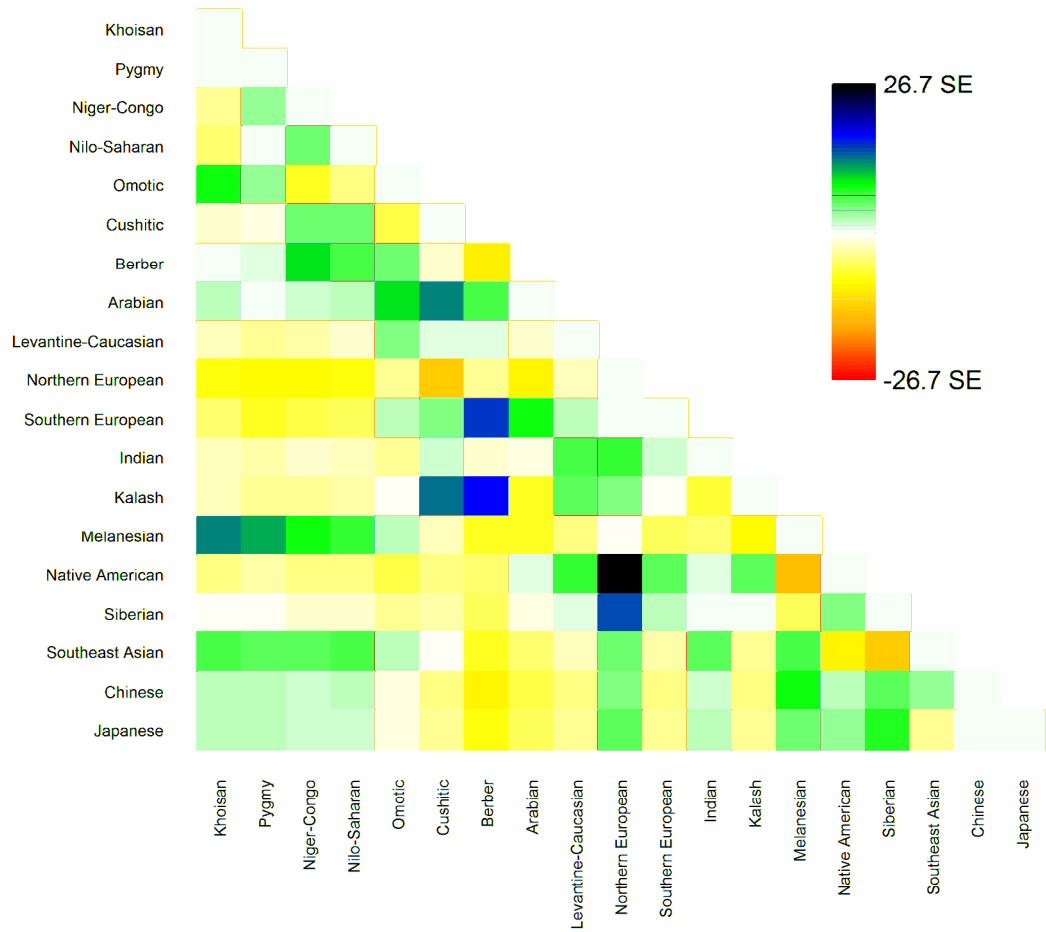

Supplementary Figure S1E. Residual plot corresponding to Figure 6.

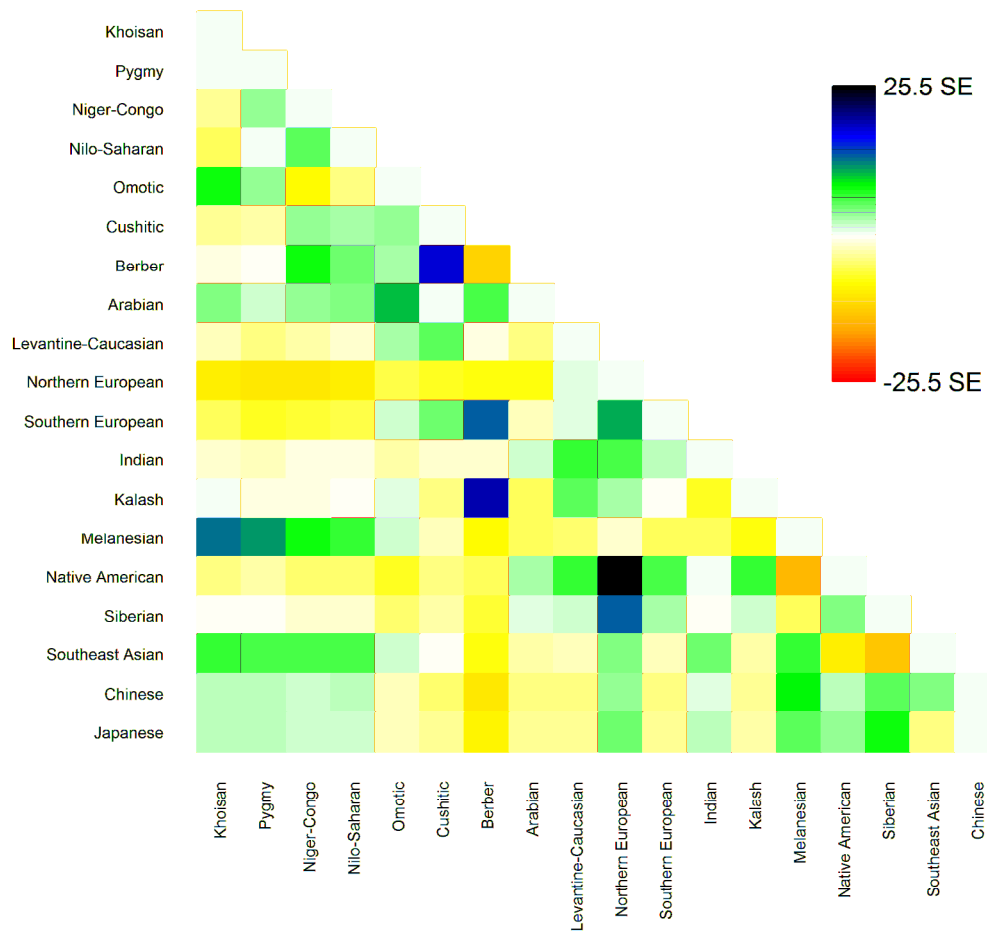

Supplementary Figure S1F. Residual plot corresponding to Figure 7.

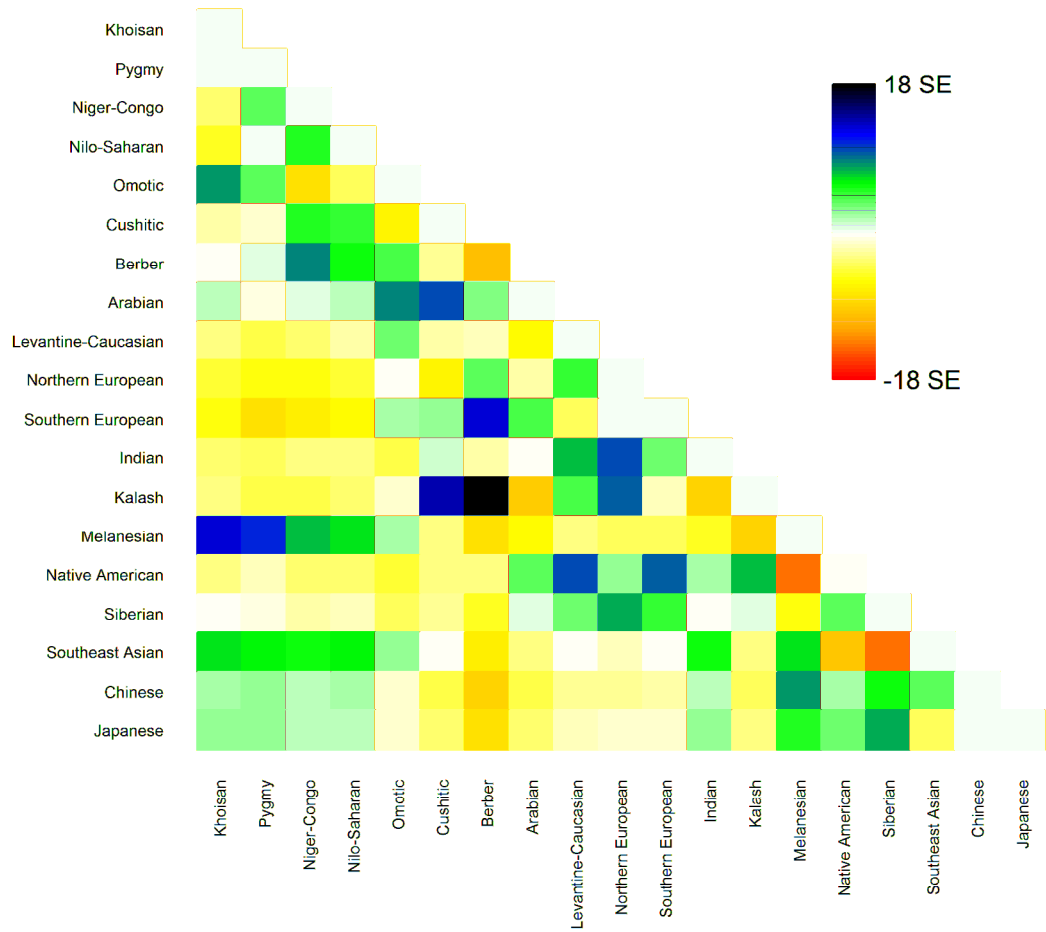

Supplementary Figure S1G. Residual plot corresponding to Figure 8.



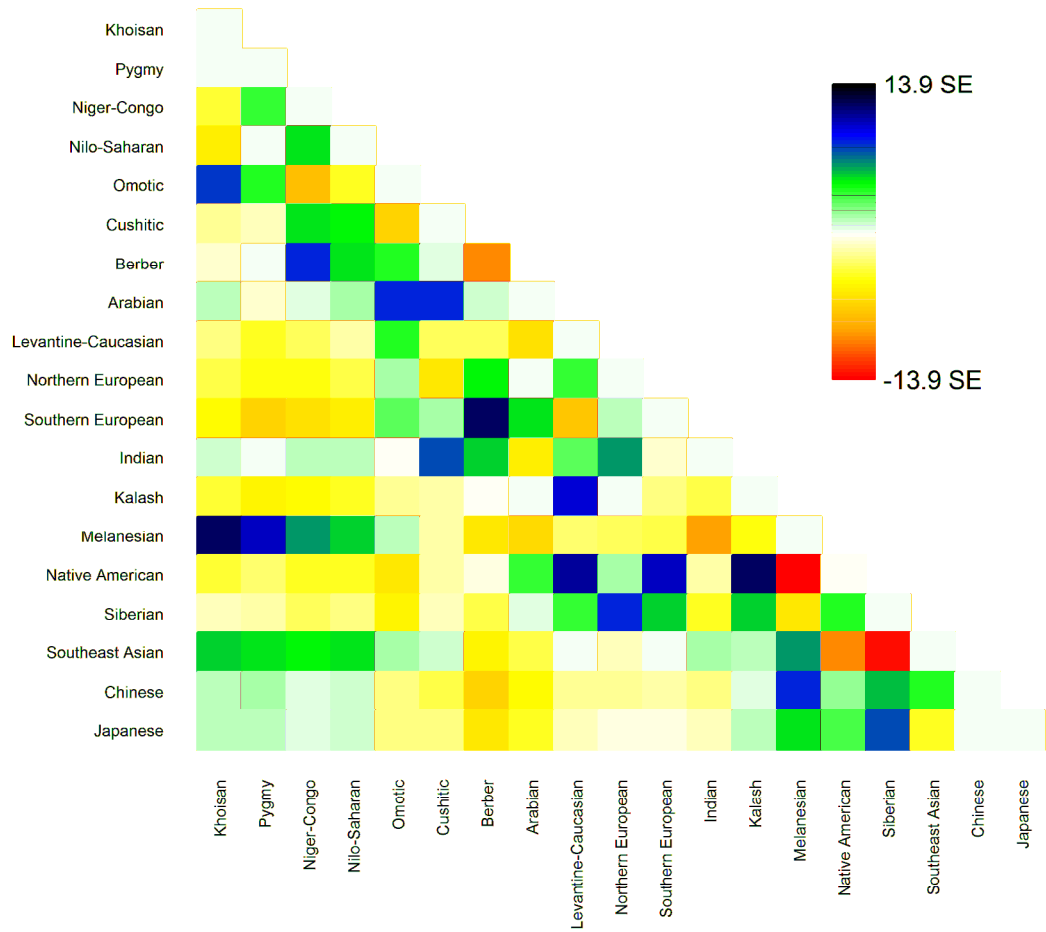

Supplementary Figure S1H. Residual plot corresponding to Figure 9.

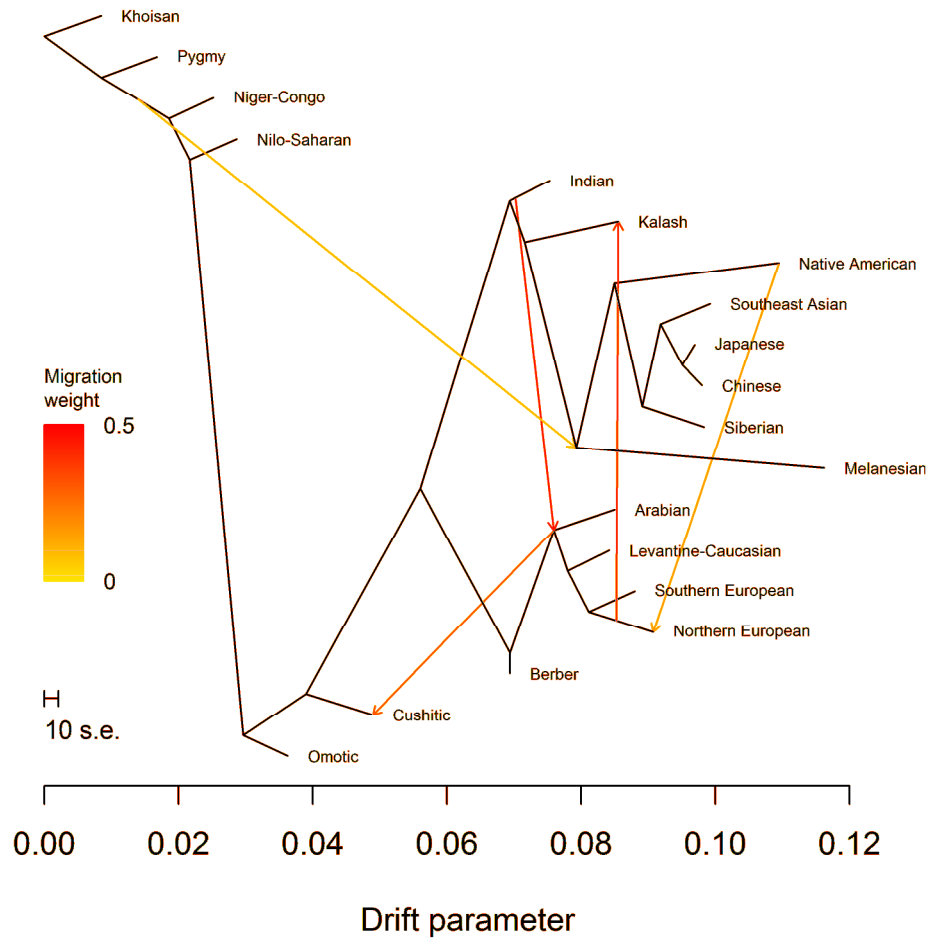

Supplementary Figure S2A. Five migration events. The fifth event suggests gene flow from a point between Khoisan/Pygmy and Niger-Congo/Nilo-Saharan ancestries to East Asia, possibly reflecting Y DNA haplogroups C and/or D.

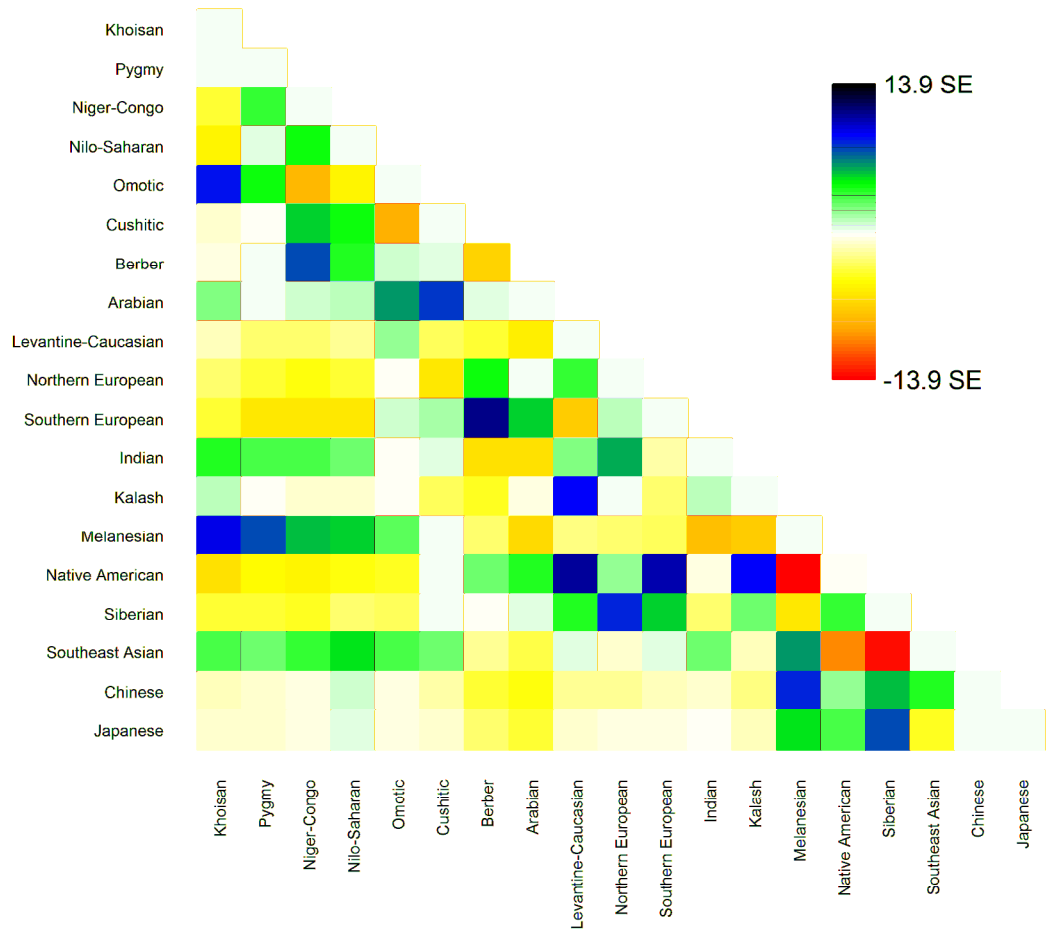

Supplementary Figure S2B. Residual plot corresponding to Supplementary Figure S2A.

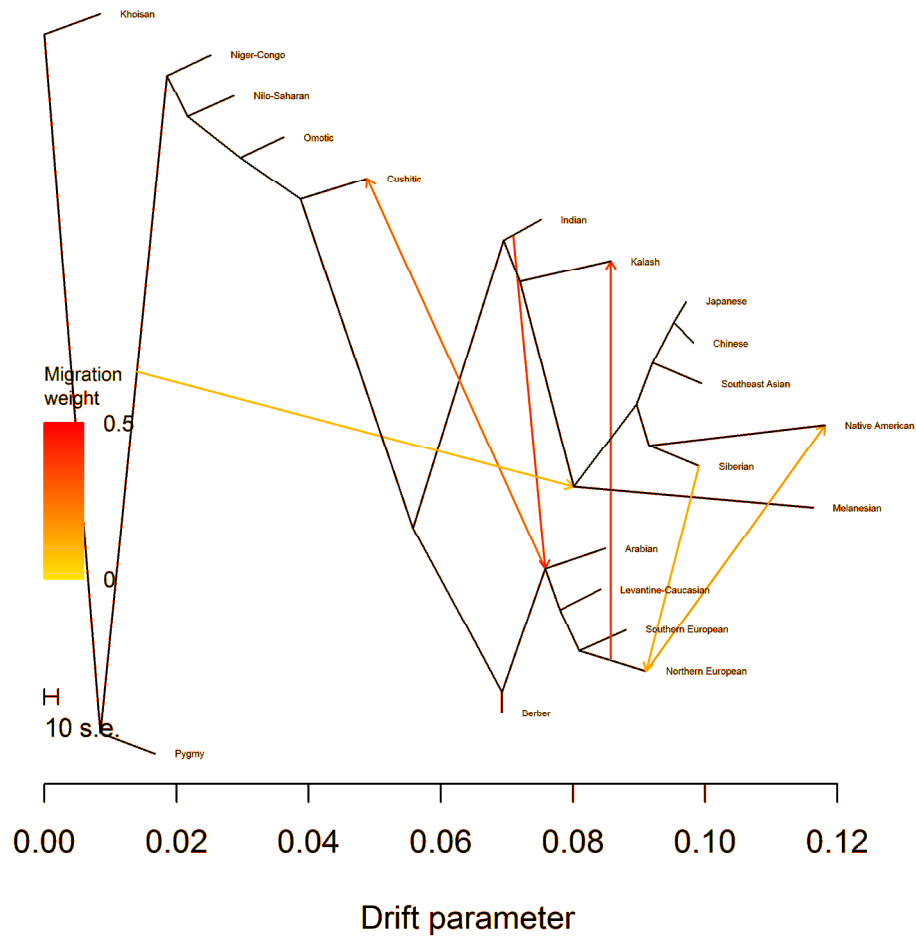

Supplementary Figure S2C. Six migration events. The sixth event suggests gene flow from Siberian to Northern European ancestry, likely reflecting Y DNA haplogroup N.

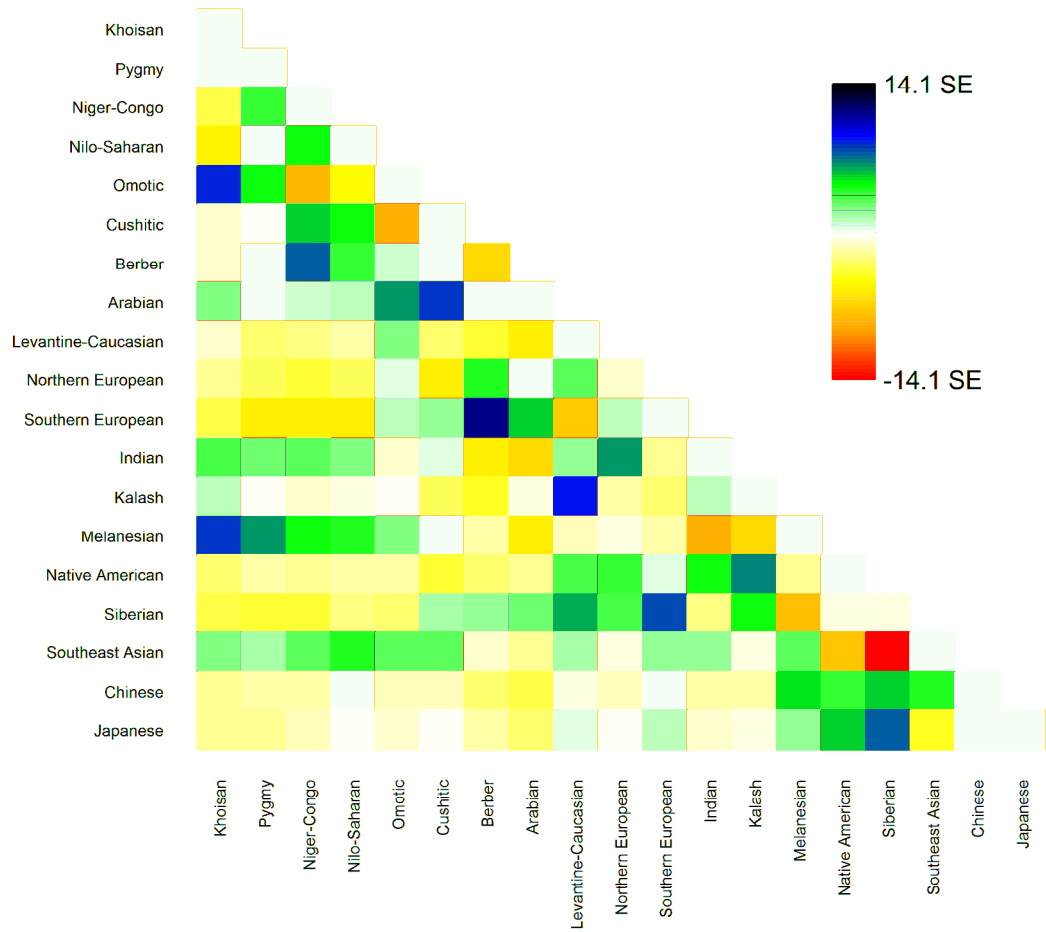

Supplementary Figure S2D. Residual plot corresponding to Supplementary Figure S2C.

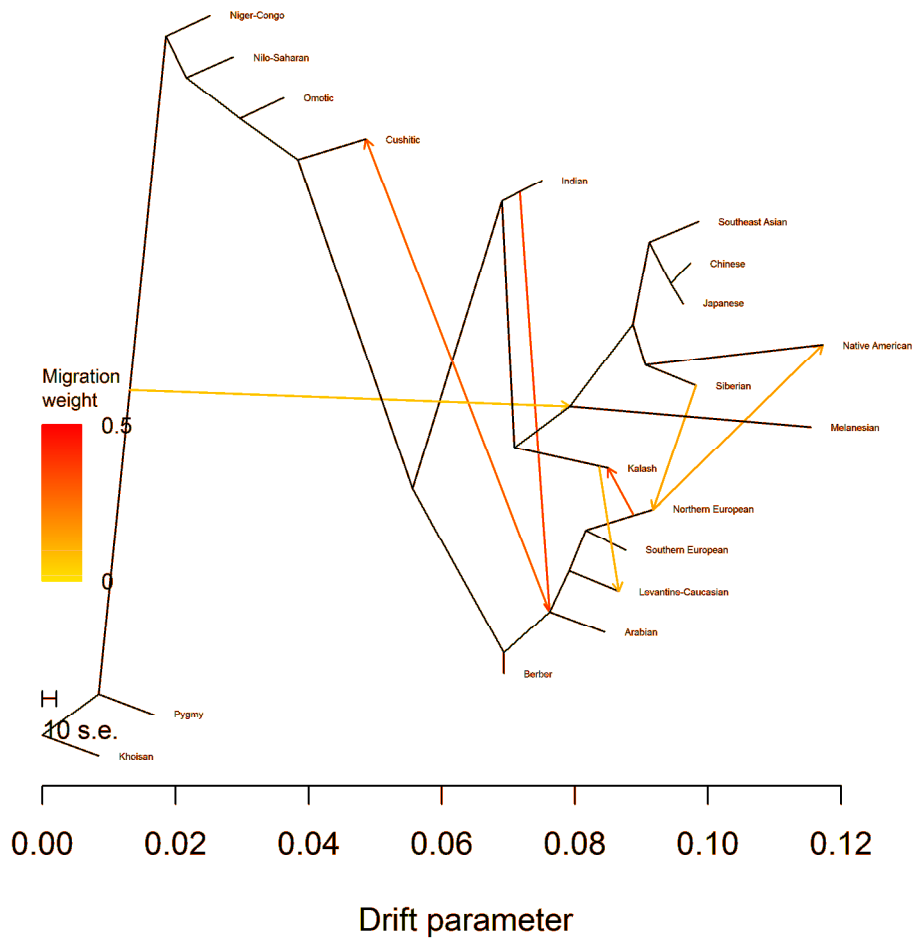

Supplementary Figure S2E. Seven migration events. The seventh event suggests gene flow between Levantine-Caucasian and Kalash ancestries, possibly reflecting Y DNA haplogroup G.

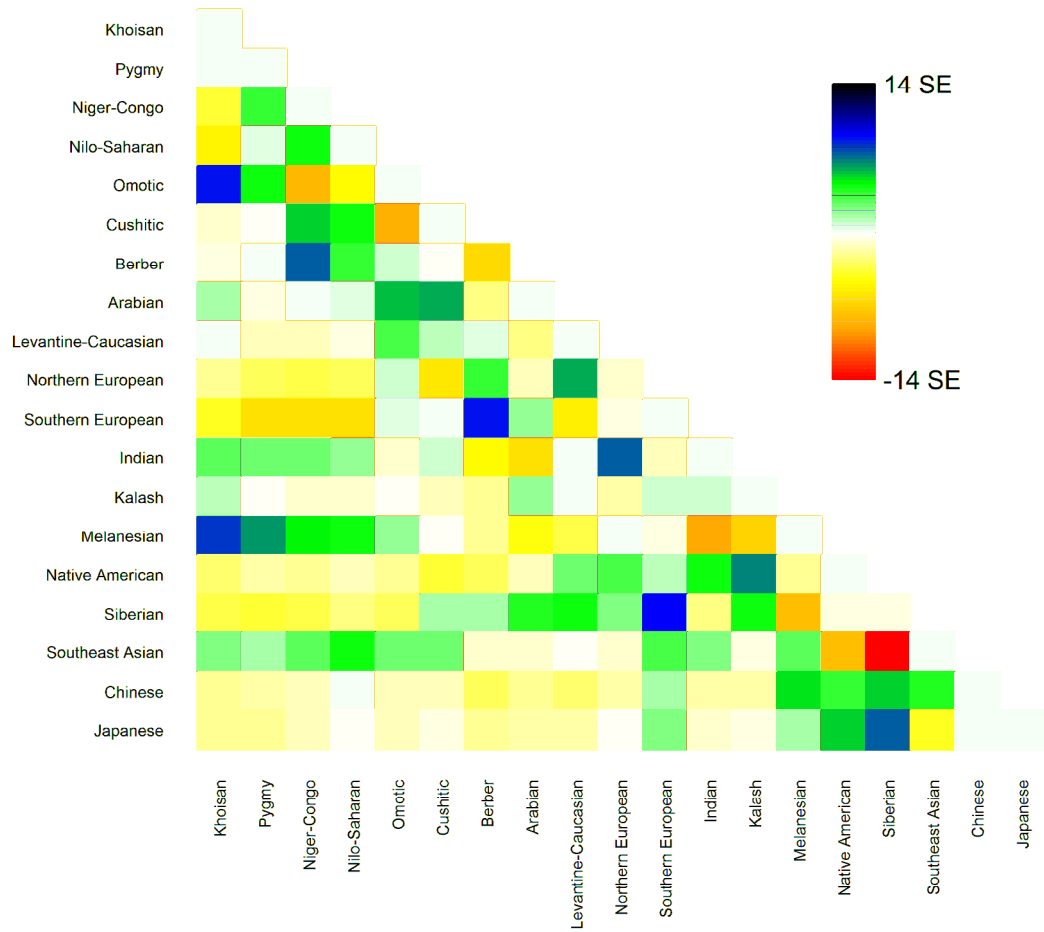

Supplementary Figure S2F. Residual plot corresponding to Supplementary Figure S2E.

### Supplementary Text: Derivation of $f_3$ and $f_4$ statistics

Consider two putative parental populations  $A$  and  $B$  and a putative admixed population  $X$ . Let the sample sizes in units of alleles be  $n_A$ ,  $n_B$ , and  $n_X$ , respectively. At a marker, let the true population allele frequencies be  $p_A$ ,  $p_B$ , and  $p_X$ , respectively. Let the corresponding sample estimates be  $\hat{p}_A$ ,  $\hat{p}_B$ , and  $\hat{p}_X$ , respectively. The test statistic is defined as

$f_3 = (p_X - p_A)(p_X - p_B)$ <sup>1,2</sup>. Under the null hypothesis, the phylogenetic topology is an unrooted star topology (Supplementary Figure S3) and the three allele frequencies are mutually uncorrelated.

Supplementary Figure S3.

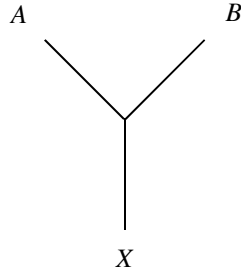

#### An Unbiased Estimator of $f_3$

By definition,  $f_3 = (p_X - p_A)(p_X - p_B) = p_X^2 - p_X p_A - p_X p_B + p_A p_B$ . Substituting the three sample estimates yields  $\hat{f}_3 = \hat{p}_X^2 - \hat{p}_X \hat{p}_A - \hat{p}_X \hat{p}_B + \hat{p}_A \hat{p}_B$ . By the linearity property of expected values,  $E(\hat{f}_3) = E(\hat{p}_X^2) - E(\hat{p}_X \hat{p}_A) - E(\hat{p}_X \hat{p}_B) + E(\hat{p}_A \hat{p}_B)$ . Taking each of these four terms one at a time,

$$E(\hat{p}_X^2) = E(\hat{p}_X)E(\hat{p}_X) + \text{Var}(\hat{p}_X),$$



$$E(\hat{p}_X \hat{p}_A) = E(\hat{p}_X)E(\hat{p}_A) + \text{Cov}(\hat{p}_X, \hat{p}_A),$$

$$E(\hat{p}_X \hat{p}_B) = E(\hat{p}_X)E(\hat{p}_B) + \text{Cov}(\hat{p}_X, \hat{p}_B), \text{ and}$$

$$E(\hat{p}_A \hat{p}_B) = E(\hat{p}_A)E(\hat{p}_B) + \text{Cov}(\hat{p}_A, \hat{p}_B).$$

Under the null hypothesis, the three covariances are zero, so that

$$E(\hat{f}_3) = p_X^2 + \text{Var}(\hat{p}_X) - p_X p_A - p_X p_B + p_A p_B = f_3 + \text{Var}(\hat{p}_X).$$

An unbiased estimator of  $f_3$  is therefore  $\hat{f}_3 - \text{Var}(\hat{p}_X)$ .

### The Variance of $f_3$

For a binomially distributed random variable  $Y \sim \text{Bin}(n, p)$  with sample size  $n$  and probability

$p$ , the first four cumulants are

$$\kappa_1 = np,$$

$$\kappa_2 = np(1-p),$$

$$\kappa_3 = np(1-p)(1-2p), \text{ and}$$

$$\kappa_4 = np(1-p)(1-6p(1-p)).$$

In terms of the cumulants, the raw moments  $\mu'_r = E(Y^r)$  are

$$\mu'_1 = \kappa_1,$$

$$\mu'_2 = \kappa_2 + \kappa_1^2,$$

$$\mu'_3 = \kappa_3 + 3\kappa_2\kappa_1 + \kappa_1^3, \text{ and}$$

$$\mu'_4 = \kappa_4 + 4\kappa_3\kappa_1 + 3\kappa_2^2 + 6\kappa_2\kappa_1^2 + \kappa_1^4.$$

Since  $\mu'_r = E(Y^r) = E((np)^r) = n^r E(p^r)$ ,  $E(p^r) = \frac{\mu'_r}{n^r}$ .

By the properties of variance,

$$\begin{aligned} \text{Var}(f_3) &= \text{Var}(p_X^2) + \text{Var}(p_X p_A) + \text{Var}(p_X p_B) + \text{Var}(p_A p_B) \\ &\quad - 2\text{Cov}(p_X^2, p_X p_A) - 2\text{Cov}(p_X^2, p_X p_B) + 2\text{Cov}(p_X^2, p_A p_B) \\ &\quad + 2\text{Cov}(p_X p_A, p_X p_B) - 2\text{Cov}(p_X p_A, p_A p_B) - 2\text{Cov}(p_X p_B, p_A p_B) \end{aligned}$$

We now define each of these ten (co)variances in terms of the raw moments:

$$\text{Var}(p_X^2) = E[(p_X^2)^2] - [E(p_X^2)]^2 = \frac{\mu'_4[X]}{n_X^4} - \left(\frac{\mu'_2[X]}{n_X^2}\right)^2,$$

$$\text{Var}(p_X p_A) = E(p_X^2)E(p_A^2) - [E(p_X)]^2 [E(p_A)]^2 = \frac{\mu'_2[X]}{n_X^2} \frac{\mu'_2[A]}{n_A^2} - \left(\frac{\mu'_1[X]}{n_X}\right)^2 \left(\frac{\mu'_1[A]}{n_A}\right)^2,$$

$$\text{Var}(p_X p_B) = E(p_X^2)E(p_B^2) - [E(p_X)]^2 [E(p_B)]^2 = \frac{\mu'_2[X]}{n_X^2} \frac{\mu'_2[B]}{n_B^2} - \left(\frac{\mu'_1[X]}{n_X}\right)^2 \left(\frac{\mu'_1[B]}{n_B}\right)^2,$$

$$\text{Var}(p_A p_B) = E(p_A^2)E(p_B^2) - [E(p_A)]^2 [E(p_B)]^2 = \frac{\mu'_2[A]}{n_A^2} \frac{\mu'_2[B]}{n_B^2} - \left(\frac{\mu'_1[A]}{n_A}\right)^2 \left(\frac{\mu'_1[B]}{n_B}\right)^2,$$

$$\text{Cov}(p_X^2, p_X p_A) = E(p_X^2 p_X p_A) - E(p_X^2)E(p_X p_A) = \frac{\mu'_3[X]}{n_X^3} \frac{\mu'_1[A]}{n_A} - \frac{\mu'_2[X]}{n_X^2} \frac{\mu'_1[X]}{n_X} \frac{\mu'_1[A]}{n_A},$$

$$\text{Cov}(p_X^2, p_X p_B) = E(p_X^2 p_X p_B) - E(p_X^2)E(p_X p_B) = \frac{\mu'_3[X]}{n_X^3} \frac{\mu'_1[B]}{n_B} - \frac{\mu'_2[X]}{n_X^2} \frac{\mu'_1[X]}{n_X} \frac{\mu'_1[B]}{n_B},$$

$$\text{Cov}(p_X^2, p_A p_B) = E(p_X^2 p_A p_B) - E(p_X^2)E(p_A p_B) = E(p_X^2)E(p_A p_B) - E(p_X^2)E(p_A p_B) = 0,$$

$$\text{Cov}(p_X p_A, p_X p_B) = E(p_X^2 p_A p_B) - E(p_X p_A)E(p_X p_B) = \frac{\mu'_1[A]}{n_A} \frac{\mu'_1[B]}{n_B} \left( \frac{\mu'_2[X]}{n_X^2} - \left(\frac{\mu'_1[X]}{n_X}\right)^2 \right),$$

$$\text{Cov}(p_X p_A, p_A p_B) = E(p_A^2 p_X p_B) - E(p_X p_A)E(p_A p_B) = \frac{\mu'_1[X]}{n_X} \frac{\mu'_1[B]}{n_B} \left( \frac{\mu'_2[A]}{n_A^2} - \left(\frac{\mu'_1[A]}{n_A}\right)^2 \right),$$

and

$$\text{Cov}(p_X p_B, p_A p_B) = E(p_B^2 p_X p_A) - E(p_X p_B) E(p_A p_B) = \frac{\mu'_1[X]}{n_X} \frac{\mu'_1[A]}{n_A} \left( \frac{\mu'_2[B]}{n_B^2} - \left( \frac{\mu'_1[B]}{n_B} \right)^2 \right).$$

Finally, raw sample moments are unbiased estimates of the raw population moments. Therefore, an unbiased estimate of the population variance can be obtained by substitution with the sample allele frequencies and sample sizes.

### The $f_4$ Statistic

Supplementary Figure S4.

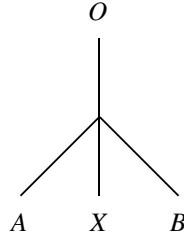

Consider three ingroup populations  $A$ ,  $B$ ,  $X$ , and an outgroup population  $O$  (Supplementary Figure S4). At a marker, let the true population allele frequencies be  $p_A$ ,  $p_B$ ,  $p_X$ , and  $p_O$ , respectively. Let the sample sizes in units of alleles be  $n_A$ ,  $n_B$ ,  $n_X$ , and  $n_O$ , respectively. Let the sample allele frequencies be  $\hat{p}_A$ ,  $\hat{p}_B$ ,  $\hat{p}_X$ , and  $\hat{p}_O$ , respectively. The test statistic is defined as

$f_4 = (p_O - p_A)(p_X - p_B) = p_O p_X - p_A p_X - p_O p_B + p_A p_B$ <sup>1,2</sup>. Under the null hypothesis of the unresolved star topology (Supplementary Figure S4),

$$\text{Cov}(p_O, p_X) = \text{Cov}(p_A, p_X) = \text{Cov}(p_O, p_B) = \text{Cov}(p_A, p_B) = 0.$$

Substituting sample estimates yields  $\hat{f}_4 = \hat{p}_O \hat{p}_X - \hat{p}_A \hat{p}_X - \hat{p}_O \hat{p}_B + \hat{p}_A \hat{p}_B$ . By the linearity property of expected values,  $E(\hat{f}_4) = E(\hat{p}_O \hat{p}_X) - E(\hat{p}_A \hat{p}_X) - E(\hat{p}_O \hat{p}_B) + E(\hat{p}_A \hat{p}_B)$ . Taking each term one at a time,

$$E(\hat{p}_O \hat{p}_X) = E(\hat{p}_O)E(\hat{p}_X) + \text{Cov}(\hat{p}_O, \hat{p}_X),$$

$$E(\hat{p}_A \hat{p}_X) = E(\hat{p}_A)E(\hat{p}_X) + \text{Cov}(\hat{p}_A, \hat{p}_X),$$

$$E(\hat{p}_O \hat{p}_B) = E(\hat{p}_O)E(\hat{p}_B) + \text{Cov}(\hat{p}_O, \hat{p}_B), \text{ and}$$

$$E(\hat{p}_A \hat{p}_B) = E(\hat{p}_A)E(\hat{p}_B) + \text{Cov}(\hat{p}_A, \hat{p}_B).$$

Under the null hypothesis,  $E(\hat{f}_4) = p_O p_X - p_A p_X - p_O p_B + p_A p_B = f_4$ , showing that  $\hat{f}_4$  is unbiased.

By the properties of variance,

$$\begin{aligned} \text{Var}(f_4) &= \text{Var}(p_O p_X) + \text{Var}(p_A p_X) + \text{Var}(p_O p_B) + \text{Var}(p_A p_B) \\ &\quad - 2\text{Cov}(p_O p_X, p_A p_X) - 2\text{Cov}(p_O p_X, p_O p_B) + 2\text{Cov}(p_O p_X, p_A p_B) \\ &\quad + 2\text{Cov}(p_A p_X, p_O p_B) - 2\text{Cov}(p_A p_X, p_A p_B) - 2\text{Cov}(p_O p_B, p_A p_B). \end{aligned}$$

The ten (co)variances are:

$$\text{Var}(p_O p_X) = E(p_O^2)E(p_X^2) - [E(p_O)]^2 [E(p_X)]^2 = \frac{\mu'_2[O]}{n_O^2} \frac{\mu'_2[X]}{n_X^2} - \left( \frac{\mu'_1[O]}{n_O} \right)^2 \left( \frac{\mu'_1[X]}{n_X} \right)^2,$$

$$\text{Var}(p_A p_X) = E(p_A^2)E(p_X^2) - [E(p_A)]^2 [E(p_X)]^2 = \frac{\mu'_2[A]}{n_A^2} \frac{\mu'_2[X]}{n_X^2} - \left( \frac{\mu'_1[A]}{n_A} \right)^2 \left( \frac{\mu'_1[X]}{n_X} \right)^2,$$

$$\text{Var}(p_O p_B) = E(p_O^2)E(p_B^2) - [E(p_O)]^2 [E(p_B)]^2 = \frac{\mu'_2[O]}{n_O^2} \frac{\mu'_2[B]}{n_B^2} - \left( \frac{\mu'_1[O]}{n_O} \right)^2 \left( \frac{\mu'_1[B]}{n_B} \right)^2,$$

$$\text{Var}(p_A p_B) = E(p_A^2)E(p_B^2) - [E(p_A)]^2 [E(p_B)]^2 = \frac{\mu'_2[A]}{n_A^2} \frac{\mu'_2[B]}{n_B^2} - \left( \frac{\mu'_1[A]}{n_A} \right)^2 \left( \frac{\mu'_1[B]}{n_B} \right)^2,$$

$$\text{Cov}(p_O p_X, p_A p_X) = E(p_O)E(p_A) \text{Var}(p_X) = \frac{\mu'_1[O]}{n_O} \frac{\mu'_1[A]}{n_A} \frac{\kappa_2[X]}{n_X^2},$$

$$\text{Cov}(p_O p_X, p_O p_B) = E(p_X)E(p_B) \text{Var}(p_O) = \frac{\mu'_1[X]}{n_X} \frac{\mu'_1[B]}{n_B} \frac{\kappa_2[O]}{n_O^2},$$

$$\text{Cov}(p_O p_X, p_A p_B) = E(p_O p_X p_A p_B) - E(p_O p_X)E(p_A p_B) = 0,$$

$$\text{Cov}(p_A p_X, p_O p_B) = E(p_A p_X p_O p_B) - E(p_A p_X)E(p_O p_B) = 0,$$

$$\text{Cov}(p_A p_X, p_A p_B) = E(p_X)E(p_B) \text{Var}(p_A) = \frac{\mu'_1[X]}{n_X} \frac{\mu'_1[B]}{n_B} \frac{\kappa_2[A]}{n_A^2},$$

and

$$\text{Cov}(p_O p_B, p_A p_B) = E(p_O)E(p_A) \text{Var}(p_B) = \frac{\mu'_1[O]}{n_O} \frac{\mu'_1[A]}{n_A} \frac{\kappa_2[B]}{n_B^2}.$$

As with the  $f_3$  statistic, raw sample moments are unbiased estimates of the raw population moments. Therefore, an unbiased estimate of the population variance can be obtained by substitution with the sample allele frequencies and sample sizes.

### Combining Markers

Assume markers are uncorrelated. To account for variance within markers as well as between markers, we calculate a  $z$ -score per marker and then combine  $z$ -scores. Specifically, let

$$z_l = \frac{f_{3_l}}{\sqrt{\text{Var}(f_{3_l})}} \text{ and } z_c = \sum_{l=1}^L z_l w_l, \text{ in which } L \text{ markers are assigned equal weight such that}$$

$w_l = \frac{1}{\sqrt{L}}$ . Then,  $z_c$  follows the standard normal distribution. Admixture in the history of  $X$  is

expected to lead to  $z_c < 0$ , which implies a one-tailed test.

Similarly, let  $z_l = \frac{f_{4_l}}{\sqrt{\text{Var}(f_{4_l})}}$  and  $z_c = \sum_{l=1}^L z_l w_l$ , in which  $L$  markers are assigned equal weight

such that  $w_l = \frac{1}{\sqrt{L}}$ . Then,  $z_c$  follows the standard normal distribution.

### Estimation of Mixture Proportions

Consider an admixed population  $X$  with a mixture proportion  $\alpha$  from parental population  $B$  and  $\beta = 1 - \alpha$  from parental population  $C$ . Further, suppose population  $A$  is a sibling to population  $B$  and population  $O$  is an outgroup. Reich *et al.*<sup>1</sup> proposed an estimator of the

mixture proportion  $\alpha = \frac{\sum f_4(A, O, X, C)}{\sum f_4(A, O, B, C)}$ , in which  $f_4(A, O, X, C) = (p_A - p_O)(p_X - p_C)$  and

$f_4(A, O, B, C) = (p_A - p_O)(p_B - p_C)$  for each marker and the summations are over all markers.

### Supplementary References

1. Reich D, Thangaraj K, Patterson N, Price AL, Singh L. Reconstructing Indian population history. *Nature* **461**, 489-494 (2009).
2. Patterson N, *et al.* Ancient admixture in human history. *Genetics* **192**, 1065-1093 (2012).

Supplementary Table S1. Sample description.

| Region | Sample                 | Longitude <sup>1</sup> | Latitude <sup>2</sup> | Sample Size | Reference (PMID) |
|--------|------------------------|------------------------|-----------------------|-------------|------------------|
| Africa | !Xun                   | 17.6667                | -14.6667              | 17          | 22997136         |
| Africa | !Xun                   | 17.6667                | -14.6667              | 8           | 23516368         |
| Africa | /Gui and //Gana        | 24.5019889             | -23.3408495           | 9           | 22997136         |
| Africa | ≠Khomani               | 20.78333333            | -26.98333333          | 32          | 22997136         |
| Africa | Agaw                   | 41                     | 12                    | 10          | 22726845         |
| Africa | Algeria                | 3.216666667            | 36.76666667           | 19          | 22253600         |
| Africa | amaXhosa               | 27                     | -32                   | 15          | 23516368         |
| Africa | Amhara                 | 39                     | 10                    | 24          | 22726845         |
| Africa | Amhara                 | 39                     | 10                    | 7           | 20531471         |
| Africa | Angolan !Xun           | 19                     | -17                   | 4           | 23516368         |
| Africa | Anuak                  | 34                     | 8                     | 22          | 22726845         |
| Africa | Ari Blacksmith         | 37                     | 6                     | 11          | 22726845         |
| Africa | Ari Cultivator         | 37                     | 6                     | 21          | 22726845         |
| Africa | Bamoun                 | 5.5                    | 10.8                  | 18          | 20080753         |
| Africa | Bantu Kenya            | 37                     | -3                    | 10          | 18292342         |
| Africa | Bantu South Africa     | 25.2                   | -25.8                 | 6           | 18292342         |
| Africa | Basters                | 17.08333333            | -23.31666667          | 30          | 23516368         |
| Africa | Biaka Pygmy            | 17                     | 4                     | 21          | 18292342         |
| Africa | Brong                  | 7.5                    | -2                    | 8           | 20080753         |
| Africa | Bulala                 | 13                     | 18                    | 15          | 20080753         |
| Africa | Coloured Colesberg     | 25.1                   | -30.71666667          | 18          | 22997136         |
| Africa | Coloured District 6    | 18.43416667            | -33.93277778          | 8           | 23516368         |
| Africa | Coloured Eastern Cape  | 27                     | -32                   | 7           | 23516368         |
| Africa | Coloured Northern Cape | 22                     | -30                   | 10          | 23516368         |
| Africa | Coloured Wellington    | 18.98333333            | -33.63333333          | 17          | 22997136         |
| Africa | Egypt                  | 31.21666667            | 30.03333333           | 19          | 22253600         |
| Africa | Egypt                  | 30                     | 26                    | 12          | 20531471         |
| Africa | Ethiopia Jew           | 38.74                  | 9.03                  | 12          | 20531471         |
| Africa | Ethiopian Somali       | 42                     | 9                     | 8           | 22726845         |
| Africa | Fang                   | 2.5                    | 13                    | 15          | 20080753         |
| Africa | Gumuz                  | 35.73305556            | 10.63888889           | 16          | 22726845         |
| Africa | Hausa                  | 9.1                    | 7.5                   | 12          | 20080753         |
| Africa | Ju/'hoan               | 20.5022                | -19.5931              | 3           | 23516368         |
| Africa | Ju/'hoansi             | 20.5022                | -19.5931              | 2           | 22997136         |
| Africa | Kaba                   | 8                      | 16.8                  | 16          | 20080753         |
| Africa | Karretjie              | 25.1                   | -30.71666667          | 16          | 22997136         |
| Africa | Khwe                   | 24.275                 | -17.50388889          | 16          | 22997136         |
| Africa | Kongo                  | -5.5                   | 15                    | 9           | 20080753         |
| Africa | Libya                  | 20.06666667            | 32.11666667           | 17          | 22253600         |
| Africa | LWK                    | 34.58333333            | 0.5                   | 87          | 23128226         |
| Africa | Mada                   | 10.8                   | 14.1                  | 12          | 20080753         |

|         |                 |              |              |    |          |
|---------|-----------------|--------------|--------------|----|----------|
| Africa  | Mandenka        | -12          | 12           | 21 | 18292342 |
| Africa  | Mbuti Pygmy     | 29           | 1            | 10 | 18292342 |
| Africa  | MKK             | 35.28333333  | 0.516666667  | 93 | 20811451 |
| Africa  | Morocco         | -6           | 32           | 10 | 20531471 |
| Africa  | Morocco Jew     | -6           | 32           | 15 | 20531471 |
| Africa  | Mozabite        | 3            | 32           | 28 | 18292342 |
| Africa  | Nama            | 17.85        | -22.57       | 19 | 22997136 |
| Africa  | North Morocco   | -6.84165     | 34.020882    | 18 | 22253600 |
| Africa  | Oromo           | 37           | 8            | 7  | 20531471 |
| Africa  | Oromo           | 37           | 8            | 21 | 22726845 |
| Africa  | Sahrawi         | -13          | 27           | 18 | 22253600 |
| Africa  | San             | 20           | -21          | 2  | 18292342 |
| Africa  | SE Bantu        | 27.93333333  | -29.46666667 | 18 | 22997136 |
| Africa  | Somali          | 42           | 9            | 22 | 22726845 |
| Africa  | South Morocco   | -9.6         | 30.43333333  | 16 | 22253600 |
| Africa  | Sudanese        | 31.6         | 4.85         | 20 | 22726845 |
| Africa  | SW Bantu        | 17.85        | -22.57       | 11 | 22997136 |
| Africa  | Tigray          | 38           | 9            | 5  | 20531471 |
| Africa  | Tunisia         | 10.18333333  | 36.8         | 18 | 22253600 |
| Africa  | Tygray          | 38           | 9            | 20 | 22726845 |
| Africa  | Wolayta         | 37           | 6            | 6  | 22726845 |
| Africa  | Yoruba          | 5            | 8            | 21 | 18292342 |
| Africa  | YRI             | 3.916666667  | 7.396388889  | 88 | 23128226 |
| America | ASW             | -97.41666667 | 35.21666667  | 57 | 23128226 |
| America | CEU             | -111.6608333 | 40.24444444  | 85 | 23128226 |
| America | CLM             | -75.57513611 | 6.235925     | 60 | 23128226 |
| America | Colombian       | -68          | 3            | 2  | 18292342 |
| America | Karitiana       | -63          | -10          | 2  | 18292342 |
| America | Maya            | -91          | 19           | 18 | 18292342 |
| America | MXL             | -99.36666667 | 19.05        | 60 | 23128226 |
| America | Pima            | -108         | 29           | 2  | 18292342 |
| America | PUR             | -67.13972222 | 18.20111111  | 55 | 23128226 |
| America | Surui           | -62          | -11          | 1  | 18292342 |
| Asia    | Arunthathiyar   | 80.27        | 13.09        | 4  | 20531471 |
| Asia    | Balochi         | 66.5         | 30.5         | 24 | 18292342 |
| Asia    | Brahui          | 66.5         | 30.5         | 24 | 18292342 |
| Asia    | Burusho         | 74           | 36.5         | 23 | 18292342 |
| Asia    | Cambodian       | 105          | 12           | 8  | 18292342 |
| Asia    | CHB             | 116.3916667  | 39.91388889  | 97 | 23128226 |
| Asia    | CHS             | 114.1        | 22.55        | 92 | 23128226 |
| Asia    | Dai             | 100          | 21           | 10 | 18292342 |
| Asia    | Daur            | 124          | 48.5         | 9  | 18292342 |
| Asia    | Han North China | 114          | 39           | 10 | 18292342 |



|          |                   |              |             |    |          |
|----------|-------------------|--------------|-------------|----|----------|
| Asia     | Han South China   | 114          | 36          | 34 | 18292342 |
| Asia     | Hazara            | 70           | 33.5        | 22 | 18292342 |
| Asia     | Hezhen            | 133.5        | 47.5        | 8  | 18292342 |
| Asia     | Japanese          | 138          | 38          | 28 | 18292342 |
| Asia     | JPT               | 139.6917     | 35.68950556 | 89 | 23128226 |
| Asia     | Kalash            | 71.5         | 36          | 23 | 18292342 |
| Asia     | Kochi Jew         | 76.28        | 9.97        | 4  | 20531471 |
| Asia     | Lahu              | 100          | 22          | 7  | 18292342 |
| Asia     | Makrani           | 64           | 26          | 25 | 18292342 |
| Asia     | Malaya            | 100          | 7           | 1  | 20531471 |
| Asia     | Miaozu            | 109          | 28          | 10 | 18292342 |
| Asia     | Mongolia          | 111          | 45          | 10 | 18292342 |
| Asia     | Mumbai Jew        | 72.82583333  | 18.975      | 4  | 20531471 |
| Asia     | Naxi              | 100          | 26          | 7  | 18292342 |
| Asia     | North Kannadi     | 76.972       | 8.5074      | 8  | 20531471 |
| Asia     | Oroqen            | 126.5        | 50.5        | 9  | 18292342 |
| Asia     | Paniya            | 76.972       | 8.5074      | 3  | 20531471 |
| Asia     | Pathan            | 70.5         | 33.5        | 22 | 18292342 |
| Asia     | She               | 119          | 27          | 9  | 18292342 |
| Asia     | Sindhi            | 69           | 25.5        | 24 | 18292342 |
| Asia     | Singapore Chinese | 103.8        | 1.3         | 96 | 19700652 |
| Asia     | Singapore Indian  | 103.8        | 1.3         | 83 | 19700652 |
| Asia     | Singapore Malay   | 103.8        | 1.3         | 89 | 19700652 |
| Asia     | Tu                | 101          | 36          | 10 | 18292342 |
| Asia     | Tujia             | 109          | 29          | 10 | 18292342 |
| Asia     | Uyгур             | 81           | 44          | 10 | 18292342 |
| Asia     | Uzbekistan        | 69.21666667  | 41.26666667 | 15 | 20531471 |
| Asia     | Uzbekistan Jew    | 69.21666667  | 41.26666667 | 2  | 20531471 |
| Asia     | Xibo              | 81.5         | 43.5        | 9  | 18292342 |
| Asia     | Yakut             | 129.5        | 63          | 25 | 18292342 |
| Asia     | Yizu              | 103          | 28          | 10 | 18292342 |
| Caucasus | Adygei            | 39           | 44          | 15 | 18292342 |
| Caucasus | Armenia           | 44.51666667  | 40.18333333 | 19 | 20531471 |
| Caucasus | Azerbaijan Jew    | 47.7         | 40.3        | 8  | 20531471 |
| Caucasus | Georgia           | 44.78333333  | 41.71666667 | 20 | 20531471 |
| Caucasus | Georgia Jew       | 44.78333333  | 41.71666667 | 4  | 20531471 |
| Caucasus | Lezgian           | 46.88333333  | 43.1        | 18 | 20531471 |
| Europe   | Ashkenazi East    | NA           | NA          | 9  | 20531471 |
| Europe   | Ashkenazi West    | NA           | NA          | 9  | 20531471 |
| Europe   | Basque            | 0            | 43          | 24 | 18292342 |
| Europe   | Basque            | -1.916944444 | 42.88194444 | 20 | 22253600 |
| Europe   | Belorussia        | 27.55        | 53.91666667 | 9  | 20531471 |
| Europe   | Bulgaria Jew      | 25.5         | 42.75       | 9  | 20531471 |

|             |               |             |             |    |          |
|-------------|---------------|-------------|-------------|----|----------|
| Europe      | Chuvash       | 47.1        | 55.55       | 17 | 20531471 |
| Europe      | FIN           | 24.9375     | 60.17083    | 93 | 23128226 |
| Europe      | French        | 2           | 46          | 28 | 18292342 |
| Europe      | GBR           | 0.73        | 51.19       | 88 | 23128226 |
| Europe      | Hungary       | 19.25       | 47.43333333 | 19 | 20531471 |
| Europe      | IBS           | -5.667607   | 40.961612   | 14 | 23128226 |
| Europe      | Lithuania     | 25.31666667 | 54.68333333 | 10 | 20531471 |
| Europe      | North Italian | 10          | 46          | 11 | 18292342 |
| Europe      | Orcadian      | -3          | 59          | 13 | 18292342 |
| Europe      | Romania       | 26.1        | 44.41666667 | 16 | 20531471 |
| Europe      | Romania Jew   | 26.1        | 44.41666667 | 3  | 20531471 |
| Europe      | Russian       | 40          | 61          | 24 | 18292342 |
| Europe      | Sardinian     | 9           | 40          | 27 | 18292342 |
| Europe      | Spain         | -3.7        | 40.43333333 | 12 | 20531471 |
| Europe      | TSI           | 11.25       | 43.78333333 | 98 | 23128226 |
| Europe      | Tuscan        | 11          | 43          | 6  | 18292342 |
| Middle East | Bedouin       | 35          | 31          | 45 | 18292342 |
| Middle East | Cyprus        | 33          | 35          | 12 | 20531471 |
| Middle East | Druze         | 35          | 32          | 41 | 18292342 |
| Middle East | Iran          | 53          | 32          | 19 | 20531471 |
| Middle East | Iran Jew      | 53          | 32          | 4  | 20531471 |
| Middle East | Iraq Jew      | 44          | 33          | 10 | 20531471 |
| Middle East | Jordan        | 35.93333333 | 31.95       | 20 | 20531471 |
| Middle East | Lebanon       | 35.53333333 | 33.9        | 75 | 23468648 |
| Middle East | Lebanon       | 35.53333333 | 33.9        | 7  | 20531471 |
| Middle East | Palestinian   | 35          | 32          | 44 | 18292342 |
| Middle East | Qatari        | 51.53333333 | 25.28666667 | 16 | 20579625 |
| Middle East | Samaritan     | 34.78333333 | 32.06666667 | 2  | 20531471 |
| Middle East | Saudi Arabia  | 45          | 24          | 20 | 20531471 |
| Middle East | Syria         | 36.3        | 33.5        | 16 | 20531471 |
| Middle East | Turkey        | 30          | 40          | 19 | 20531471 |
| Middle East | Turkey Jew    | 30          | 40          | 10 | 20531471 |
| Middle East | Yemen         | 44.20638889 | 15.34833333 | 8  | 20531471 |
| Middle East | Yemen Jew     | 44.20638889 | 15.34833333 | 15 | 20531471 |
| Oceania     | Melanesian    | 155         | -6          | 5  | 18292342 |
| Oceania     | Papuan        | 143         | -4          | 2  | 18292342 |

<sup>1</sup> Positive values indicate east and negative values indicate west.

<sup>2</sup> Positive values indicate north and negative values indicate south.

Supplementary Table 2.  $f_3$  statistics.

| Parent Ancestry <i>A</i> | Parent Ancestry <i>B</i> | Test Ancestry <i>X</i> | Z-score | Unadjusted <i>P</i> -value | Adjusted <i>P</i> -value |
|--------------------------|--------------------------|------------------------|---------|----------------------------|--------------------------|
| Southern European        | Niger-Congo              | Berber                 | -129.54 | 0                          | 0                        |
| Southern European        | Niger-Congo              | Cushitic               | -124.39 | 0                          | 0                        |
| Southern European        | Khoisan                  | OmotiC                 | -102.52 | 0                          | 0                        |
| Southern European        | Khoisan                  | Cushitic               | -102.48 | 0                          | 0                        |
| Southern European        | Nilo-Saharan             | Berber                 | -98.02  | 0                          | 0                        |
| Niger-Congo              | Arabian                  | Cushitic               | -97.76  | 0                          | 0                        |
| Southern European        | Nilo-Saharan             | Cushitic               | -97.58  | 0                          | 0                        |
| Levantine-Caucasian      | Niger-Congo              | Cushitic               | -95.69  | 0                          | 0                        |
| Khoisan                  | Northern European        | OmotiC                 | -94.26  | 0                          | 0                        |
| Levantine-Caucasian      | Khoisan                  | OmotiC                 | -94.15  | 0                          | 0                        |
| Southern European        | Khoisan                  | Berber                 | -90.69  | 0                          | 0                        |
| Khoisan                  | Chinese                  | OmotiC                 | -85.40  | 0                          | 0                        |
| Niger-Congo              | Northern European        | Berber                 | -85.03  | 0                          | 0                        |
| Khoisan                  | Arabian                  | OmotiC                 | -84.74  | 0                          | 0                        |
| Levantine-Caucasian      | Khoisan                  | Cushitic               | -83.61  | 0                          | 0                        |
| Southern European        | Pygmy                    | Cushitic               | -80.98  | 0                          | 0                        |
| Levantine-Caucasian      | Niger-Congo              | Berber                 | -79.47  | 0                          | 0                        |
| Khoisan                  | Arabian                  | Cushitic               | -77.93  | 0                          | 0                        |
| Niger-Congo              | Northern European        | Cushitic               | -77.75  | 0                          | 0                        |
| Nilo-Saharan             | Arabian                  | Cushitic               | -74.33  | 0                          | 0                        |
| Southern European        | Pygmy                    | Berber                 | -73.43  | 0                          | 0                        |
| Khoisan                  | Northern European        | Cushitic               | -71.98  | 0                          | 0                        |
| Khoisan                  | Native American          | OmotiC                 | -71.53  | 0                          | 0                        |
| Southern European        | Pygmy                    | OmotiC                 | -70.16  | 0                          | 0                        |
| Levantine-Caucasian      | Nilo-Saharan             | Cushitic               | -69.53  | 0                          | 0                        |
| Niger-Congo              | Arabian                  | Berber                 | -68.42  | 0                          | 0                        |
| Khoisan                  | Japanese                 | OmotiC                 | -68.27  | 0                          | 0                        |
| Southeast Asian          | Khoisan                  | OmotiC                 | -66.99  | 0                          | 0                        |
| Khoisan                  | Indian                   | OmotiC                 | -65.11  | 0                          | 0                        |
| Khoisan                  | Northern European        | Berber                 | -62.90  | 0                          | 0                        |
| Levantine-Caucasian      | Pygmy                    | OmotiC                 | -62.41  | 0                          | 0                        |
| Pygmy                    | Arabian                  | Cushitic               | -61.39  | 0                          | 0                        |
| Berber                   | Khoisan                  | OmotiC                 | -60.79  | 0                          | 0                        |
| Levantine-Caucasian      | Pygmy                    | Cushitic               | -60.49  | 0                          | 0                        |
| Pygmy                    | Northern European        | OmotiC                 | -59.60  | 0                          | 0                        |
| Pygmy                    | Arabian                  | OmotiC                 | -58.20  | 0                          | 0                        |
| Khoisan                  | Siberian                 | OmotiC                 | -57.99  | 0                          | 0                        |
| Nilo-Saharan             | Northern European        | Cushitic               | -57.05  | 0                          | 0                        |
| Nilo-Saharan             | Northern European        | Berber                 | -57.00  | 0                          | 0                        |
| Khoisan                  | Kalash                   | OmotiC                 | -56.82  | 0                          | 0                        |
| Levantine-Caucasian      | Khoisan                  | Berber                 | -55.39  | 0                          | 0                        |
| Levantine-Caucasian      | Chinese                  | Indian                 | -50.91  | 0                          | 0                        |
| Niger-Congo              | Native American          | Indian                 | -50.43  | 0                          | 0                        |
| Southern European        | Chinese                  | Indian                 | -49.47  | 0                          | 0                        |
| Pygmy                    | Northern European        | Cushitic               | -49.18  | 0                          | 0                        |
| Levantine-Caucasian      | Nilo-Saharan             | Berber                 | -47.65  | 0                          | 0                        |
| Pygmy                    | Chinese                  | OmotiC                 | -47.34  | 0                          | 0                        |
| Southern European        | Niger-Congo              | OmotiC                 | -46.95  | 0                          | 0                        |
| Melanesian               | Khoisan                  | OmotiC                 | -45.32  | 0                          | 0                        |

|                     |                     |                   |        |           |           |
|---------------------|---------------------|-------------------|--------|-----------|-----------|
| Southern European   | Native American     | Northern European | -44.52 | 0         | 0         |
| Melanesian          | Southern European   | Indian            | -44.45 | 0         | 0         |
| Khoisan             | Chinese             | Nilo-Saharan      | -44.34 | 0         | 0         |
| Melanesian          | Niger-Congo         | Indian            | -43.75 | 0         | 0         |
| Melanesian          | Levantine-Caucasian | Indian            | -43.70 | 0         | 0         |
| Southern European   | OmotiC              | Berber            | -43.49 | 0         | 0         |
| Khoisan             | Arabian             | Berber            | -42.95 | 0         | 0         |
| Southern European   | Nilo-Saharan        | OmotiC            | -42.15 | 0         | 0         |
| Nilo-Saharan        | Arabian             | Berber            | -40.94 | 0         | 0         |
| Pygmy               | Northern European   | Berber            | -40.73 | 0         | 0         |
| Southern European   | Khoisan             | Nilo-Saharan      | -39.91 | 0         | 0         |
| Khoisan             | Native American     | Indian            | -39.32 | 0         | 0         |
| Pygmy               | Native American     | OmotiC            | -38.34 | 0         | 0         |
| Khoisan             | Northern European   | Nilo-Saharan      | -38.33 | 0         | 0         |
| Southeast Asian     | Levantine-Caucasian | Indian            | -38.30 | 0         | 0         |
| Japanese            | Pygmy               | OmotiC            | -38.00 | 0         | 0         |
| Southeast Asian     | Pygmy               | OmotiC            | -37.86 | 0         | 0         |
| Levantine-Caucasian | Niger-Congo         | OmotiC            | -37.33 | 2.99E-305 | 8.69E-302 |
| Levantine-Caucasian | Khoisan             | Nilo-Saharan      | -36.62 | 5.95E-294 | 1.73E-290 |
| Pygmy               | Indian              | OmotiC            | -36.57 | 4.71E-293 | 1.37E-289 |
| Levantine-Caucasian | Pygmy               | Berber            | -36.27 | 2.14E-288 | 6.21E-285 |
| Khoisan             | Cushitic            | OmotiC            | -36.20 | 3.53E-287 | 1.02E-283 |
| Niger-Congo         | Arabian             | OmotiC            | -35.89 | 2.02E-282 | 5.86E-279 |
| Niger-Congo         | Chinese             | Japanese          | -35.62 | 3.36E-278 | 9.76E-275 |
| Niger-Congo         | Native American     | OmotiC            | -35.47 | 6.64E-276 | 1.93E-272 |
| Southern European   | Chinese             | Japanese          | -35.45 | 1.43E-275 | 4.15E-272 |
| Niger-Congo         | Native American     | Berber            | -35.44 | 1.83E-275 | 5.32E-272 |
| Niger-Congo         | Northern European   | OmotiC            | -34.86 | 1.34E-266 | 3.89E-263 |
| Southern European   | Southeast Asian     | Indian            | -34.82 | 6.63E-266 | 1.93E-262 |
| Berber              | Pygmy               | OmotiC            | -34.24 | 3.12E-257 | 9.07E-254 |
| Chinese             | Northern European   | Japanese          | -34.19 | 2.00E-256 | 5.81E-253 |
| Pygmy               | Kalash              | OmotiC            | -34.07 | 9.84E-255 | 2.86E-251 |
| Niger-Congo         | Native American     | Cushitic          | -33.52 | 1.04E-246 | 3.03E-243 |
| Melanesian          | Niger-Congo         | OmotiC            | -33.44 | 1.69E-245 | 4.92E-242 |
| Niger-Congo         | Kalash              | Cushitic          | -33.11 | 1.23E-240 | 3.58E-237 |
| Levantine-Caucasian | Nilo-Saharan        | OmotiC            | -32.54 | 1.27E-232 | 3.68E-229 |
| Levantine-Caucasian | Chinese             | Japanese          | -32.11 | 1.85E-226 | 5.39E-223 |
| Pygmy               | Siberian            | OmotiC            | -32.08 | 3.64E-226 | 1.06E-222 |
| Melanesian          | Northern European   | Indian            | -31.71 | 5.45E-221 | 1.58E-217 |
| Levantine-Caucasian | Japanese            | Indian            | -31.57 | 4.56E-219 | 1.32E-215 |
| Nilo-Saharan        | Northern European   | OmotiC            | -31.50 | 4.10E-218 | 1.19E-214 |
| Khoisan             | Chinese             | Japanese          | -31.29 | 3.55E-215 | 1.03E-211 |
| Niger-Congo         | Chinese             | Indian            | -30.57 | 1.60E-205 | 4.64E-202 |
| Nilo-Saharan        | Arabian             | OmotiC            | -30.55 | 3.11E-205 | 9.04E-202 |
| Khoisan             | Chinese             | Pygmy             | -30.51 | 9.93E-205 | 2.89E-201 |
| Pygmy               | Arabian             | Berber            | -30.22 | 7.05E-201 | 2.05E-197 |
| Khoisan             | Chinese             | Indian            | -30.20 | 1.26E-200 | 3.67E-197 |
| Niger-Congo         | Chinese             | OmotiC            | -29.83 | 7.43E-196 | 2.16E-192 |
| Khoisan             | Native American     | Cushitic          | -28.86 | 1.89E-183 | 5.49E-180 |
| Nilo-Saharan        | Native American     | Indian            | -28.57 | 8.33E-180 | 2.42E-176 |
| Nilo-Saharan        | Chinese             | Japanese          | -28.02 | 4.74E-173 | 1.38E-169 |

|                     |                   |              |        |           |           |
|---------------------|-------------------|--------------|--------|-----------|-----------|
| Khoisan             | Chinese           | Cushitic     | -28.02 | 5.18E-173 | 1.50E-169 |
| Southern European   | Japanese          | Indian       | -27.96 | 2.62E-172 | 7.63E-169 |
| Niger-Congo         | Kalash            | Berber       | -26.34 | 3.46E-153 | 1.01E-149 |
| Chinese             | Arabian           | Japanese     | -26.10 | 1.94E-150 | 5.64E-147 |
| Nilo-Saharan        | Native American   | OmotiC       | -25.30 | 1.54E-141 | 4.49E-138 |
| Southern European   | Pygmy             | Nilo-Saharan | -25.28 | 2.99E-141 | 8.69E-138 |
| Chinese             | Arabian           | Indian       | -25.17 | 4.34E-140 | 1.26E-136 |
| Chinese             | Native American   | Japanese     | -25.15 | 7.24E-140 | 2.11E-136 |
| Khoisan             | Northern European | Pygmy        | -25.10 | 2.59E-139 | 7.54E-136 |
| Berber              | Khoisan           | Cushitic     | -25.09 | 3.45E-139 | 1.00E-135 |
| Melanesian          | Pygmy             | OmotiC       | -24.95 | 9.62E-138 | 2.80E-134 |
| Melanesian          | Niger-Congo       | Cushitic     | -24.60 | 6.96E-134 | 2.02E-130 |
| Khoisan             | Native American   | Nilo-Saharan | -24.17 | 2.20E-129 | 6.40E-126 |
| Southern European   | Khoisan           | Pygmy        | -24.04 | 5.69E-128 | 1.66E-124 |
| Khoisan             | Japanese          | Nilo-Saharan | -24.01 | 1.10E-127 | 3.21E-124 |
| Nilo-Saharan        | Chinese           | OmotiC       | -23.85 | 5.47E-126 | 1.59E-122 |
| Cushitic            | Chinese           | Japanese     | -23.46 | 4.71E-122 | 1.37E-118 |
| Khoisan             | Native American   | Pygmy        | -23.01 | 1.71E-117 | 4.99E-114 |
| Southeast Asian     | Niger-Congo       | OmotiC       | -22.93 | 1.08E-116 | 3.14E-113 |
| Berber              | Chinese           | Japanese     | -22.90 | 2.11E-116 | 6.13E-113 |
| Khoisan             | Kalash            | Cushitic     | -22.81 | 1.80E-115 | 5.24E-112 |
| Melanesian          | Nilo-Saharan      | OmotiC       | -22.52 | 1.29E-112 | 3.75E-109 |
| Melanesian          | Niger-Congo       | Berber       | -22.32 | 1.18E-110 | 3.44E-107 |
| Southeast Asian     | Khoisan           | Nilo-Saharan | -22.22 | 9.87E-110 | 2.87E-106 |
| Levantine-Caucasian | Khoisan           | Pygmy        | -22.18 | 2.71E-109 | 7.87E-106 |
| Niger-Congo         | Japanese          | OmotiC       | -21.70 | 9.63E-105 | 2.80E-101 |
| Melanesian          | Nilo-Saharan      | Indian       | -21.61 | 7.12E-104 | 2.07E-100 |
| Niger-Congo         | Chinese           | Nilo-Saharan | -21.57 | 1.70E-103 | 4.94E-100 |
| Levantine-Caucasian | Pygmy             | Nilo-Saharan | -21.54 | 3.46E-103 | 1.01E-99  |
| Melanesian          | Arabian           | Indian       | -21.42 | 4.81E-102 | 1.40E-98  |
| Southern European   | Khoisan           | Arabian      | -21.30 | 5.22E-101 | 1.52E-97  |
| Niger-Congo         | Chinese           | Cushitic     | -21.20 | 4.72E-100 | 1.37E-96  |
| Chinese             | Northern European | Indian       | -21.18 | 6.92E-100 | 2.01E-96  |
| Khoisan             | Native American   | Berber       | -20.77 | 3.77E-96  | 1.10E-92  |
| Pygmy               | Chinese           | Japanese     | -20.29 | 7.17E-92  | 2.08E-88  |
| Khoisan             | Arabian           | Nilo-Saharan | -20.29 | 8.60E-92  | 2.50E-88  |
| Southern European   | Khoisan           | Niger-Congo  | -20.25 | 1.93E-91  | 5.60E-88  |
| Niger-Congo         | Kalash            | OmotiC       | -20.20 | 4.52E-91  | 1.31E-87  |
| Southeast Asian     | Khoisan           | Pygmy        | -19.95 | 7.36E-89  | 2.14E-85  |
| Pygmy               | Northern European | Nilo-Saharan | -19.88 | 3.22E-88  | 9.37E-85  |
| Niger-Congo         | Siberian          | OmotiC       | -19.85 | 5.03E-88  | 1.46E-84  |
| Khoisan             | Japanese          | Pygmy        | -19.70 | 1.14E-86  | 3.33E-83  |
| Khoisan             | Northern European | Niger-Congo  | -19.26 | 5.61E-83  | 1.63E-79  |
| Chinese             | Indian            | Japanese     | -19.24 | 8.28E-83  | 2.41E-79  |
| Southern European   | OmotiC            | Cushitic     | -19.20 | 1.89E-82  | 5.48E-79  |
| Pygmy               | Chinese           | Nilo-Saharan | -18.91 | 5.03E-80  | 1.46E-76  |
| Southeast Asian     | Siberian          | Japanese     | -18.89 | 7.24E-80  | 2.11E-76  |
| Khoisan             | Chinese           | Niger-Congo  | -18.88 | 7.74E-80  | 2.25E-76  |
| Melanesian          | Niger-Congo       | Nilo-Saharan | -18.87 | 1.02E-79  | 2.97E-76  |
| Southern European   | Pygmy             | Niger-Congo  | -18.23 | 1.37E-74  | 3.99E-71  |
| Khoisan             | Native American   | Siberian     | -18.16 | 5.17E-74  | 1.50E-70  |

|                     |                     |                   |        |          |          |
|---------------------|---------------------|-------------------|--------|----------|----------|
| Niger-Congo         | Native American     | Japanese          | -17.73 | 1.25E-70 | 3.63E-67 |
| Chinese             | Northern European   | Siberian          | -17.40 | 3.92E-68 | 1.14E-64 |
| Nilo-Saharan        | Kalash              | Cushitic          | -17.24 | 6.38E-67 | 1.85E-63 |
| Levantine-Caucasian | Khoisan             | Niger-Congo       | -17.22 | 9.43E-67 | 2.74E-63 |
| Southeast Asian     | Arabian             | Indian            | -17.19 | 1.51E-66 | 4.39E-63 |
| Southern European   | Niger-Congo         | Arabian           | -17.14 | 3.43E-66 | 9.97E-63 |
| Niger-Congo         | Native American     | Siberian          | -16.78 | 1.71E-63 | 4.96E-60 |
| Omotic              | Northern European   | Berber            | -16.62 | 2.68E-62 | 7.79E-59 |
| Chinese             | Kalash              | Japanese          | -16.32 | 3.56E-60 | 1.04E-56 |
| Japanese            | Nilo-Saharan        | Omotic            | -16.07 | 2.07E-58 | 6.01E-55 |
| Southeast Asian     | Nilo-Saharan        | Omotic            | -15.85 | 7.03E-57 | 2.04E-53 |
| Khoisan             | Chinese             | Southeast Asian   | -15.83 | 9.85E-57 | 2.86E-53 |
| Chinese             | Omotic              | Japanese          | -15.81 | 1.29E-56 | 3.75E-53 |
| Pygmy               | Native American     | Indian            | -15.74 | 3.86E-56 | 1.12E-52 |
| Southeast Asian     | Native American     | Japanese          | -15.65 | 1.68E-55 | 4.87E-52 |
| Niger-Congo         | Native American     | Nilo-Saharan      | -15.59 | 3.96E-55 | 1.15E-51 |
| Nilo-Saharan        | Kalash              | Omotic            | -15.53 | 1.03E-54 | 2.99E-51 |
| Southeast Asian     | Niger-Congo         | Indian            | -15.23 | 1.07E-52 | 3.11E-49 |
| Melanesian          | Khoisan             | Pygmy             | -15.14 | 4.46E-52 | 1.30E-48 |
| Khoisan             | Arabian             | Pygmy             | -15.08 | 1.03E-51 | 3.01E-48 |
| Nilo-Saharan        | Native American     | Cushitic          | -15.08 | 1.11E-51 | 3.23E-48 |
| Southeast Asian     | Northern European   | Indian            | -14.94 | 9.47E-51 | 2.75E-47 |
| Southern European   | Chinese             | Northern European | -14.77 | 1.20E-49 | 3.48E-46 |
| Khoisan             | Indian              | Pygmy             | -14.39 | 2.83E-47 | 8.23E-44 |
| Khoisan             | Native American     | Japanese          | -14.38 | 3.66E-47 | 1.06E-43 |
| Berber              | Khoisan             | Nilo-Saharan      | -14.32 | 7.87E-47 | 2.29E-43 |
| Melanesian          | Cushitic            | Indian            | -14.26 | 2.07E-46 | 6.01E-43 |
| Melanesian          | Southern European   | Kalash            | -14.09 | 2.27E-45 | 6.59E-42 |
| Southern European   | Chinese             | Siberian          | -14.05 | 3.98E-45 | 1.16E-41 |
| Khoisan             | Indian              | Nilo-Saharan      | -13.71 | 4.45E-43 | 1.29E-39 |
| Nilo-Saharan        | Siberian            | Omotic            | -13.54 | 4.40E-42 | 1.28E-38 |
| Khoisan             | Siberian            | Pygmy             | -13.52 | 5.99E-42 | 1.74E-38 |
| Pygmy               | Arabian             | Nilo-Saharan      | -13.31 | 9.82E-41 | 2.86E-37 |
| Niger-Congo         | Siberian            | Cushitic          | -13.19 | 4.86E-40 | 1.41E-36 |
| Southern European   | Native American     | Indian            | -13.16 | 7.25E-40 | 2.11E-36 |
| Melanesian          | Levantine-Caucasian | Kalash            | -12.92 | 1.69E-38 | 4.91E-35 |
| Niger-Congo         | Chinese             | Southeast Asian   | -12.86 | 3.84E-38 | 1.12E-34 |
| Levantine-Caucasian | Pygmy               | Niger-Congo       | -12.72 | 2.22E-37 | 6.44E-34 |
| Southern European   | Niger-Congo         | Nilo-Saharan      | -12.68 | 3.63E-37 | 1.06E-33 |
| Niger-Congo         | Japanese            | Indian            | -12.57 | 1.45E-36 | 4.22E-33 |
| Cushitic            | Northern European   | Berber            | -11.99 | 2.01E-33 | 5.83E-30 |
| Melanesian          | Chinese             | Japanese          | -11.70 | 6.67E-32 | 1.94E-28 |
| Pygmy               | Cushitic            | Omotic            | -11.61 | 1.93E-31 | 5.62E-28 |
| Pygmy               | Northern European   | Niger-Congo       | -11.57 | 3.08E-31 | 8.97E-28 |
| Niger-Congo         | Siberian            | Indian            | -11.36 | 3.37E-30 | 9.81E-27 |
| Cushitic            | Native American     | Indian            | -11.32 | 5.41E-30 | 1.57E-26 |
| Chinese             | Siberian            | Japanese          | -11.30 | 6.44E-30 | 1.87E-26 |
| Khoisan             | Siberian            | Nilo-Saharan      | -11.28 | 8.44E-30 | 2.45E-26 |
| Japanese            | Arabian             | Indian            | -10.83 | 1.23E-27 | 3.57E-24 |
| Khoisan             | Japanese            | Indian            | -10.76 | 2.69E-27 | 7.83E-24 |
| Southeast Asian     | Khoisan             | Indian            | -10.47 | 5.82E-26 | 1.69E-22 |

|                     |                   |                   |        |          |          |
|---------------------|-------------------|-------------------|--------|----------|----------|
| Levantine-Caucasian | Niger-Congo       | Nilo-Saharan      | -10.36 | 1.91E-25 | 5.56E-22 |
| Melanesian          | Khoisan           | Indian            | -10.31 | 3.09E-25 | 8.99E-22 |
| Niger-Congo         | Indian            | OmotiC            | -10.03 | 5.72E-24 | 1.66E-20 |
| Nilo-Saharan        | Native American   | Berber            | -9.98  | 9.35E-24 | 2.72E-20 |
| Nilo-Saharan        | Indian            | OmotiC            | -9.85  | 3.54E-23 | 1.03E-19 |
| Levantine-Caucasian | Native American   | Indian            | -9.77  | 7.85E-23 | 2.28E-19 |
| Pygmy               | Kalash            | Cushitic          | -9.72  | 1.27E-22 | 3.70E-19 |
| Berber              | Khoisan           | Pygmy             | -9.67  | 1.94E-22 | 5.63E-19 |
| Khoisan             | Japanese          | Cushitic          | -9.67  | 2.02E-22 | 5.86E-19 |
| Berber              | Pygmy             | Cushitic          | -9.46  | 1.53E-21 | 4.44E-18 |
| Khoisan             | Native American   | Kalash            | -9.15  | 2.78E-20 | 8.08E-17 |
| Cushitic            | Chinese           | Indian            | -9.05  | 7.44E-20 | 2.16E-16 |
| Khoisan             | Kalash            | Pygmy             | -9.00  | 1.13E-19 | 3.30E-16 |
| Southern European   | Cushitic          | Berber            | -8.92  | 2.24E-19 | 6.51E-16 |
| Berber              | Niger-Congo       | Cushitic          | -8.91  | 2.57E-19 | 7.47E-16 |
| Niger-Congo         | Japanese          | Nilo-Saharan      | -8.72  | 1.37E-18 | 3.99E-15 |
| Southeast Asian     | Khoisan           | Cushitic          | -8.63  | 3.05E-18 | 8.86E-15 |
| Melanesian          | Southern European | Berber            | -8.62  | 3.28E-18 | 9.53E-15 |
| Japanese            | Northern European | Siberian          | -8.57  | 5.08E-18 | 1.48E-14 |
| Southeast Asian     | Pygmy             | Nilo-Saharan      | -8.53  | 7.48E-18 | 2.17E-14 |
| Southeast Asian     | Niger-Congo       | Nilo-Saharan      | -8.49  | 1.03E-17 | 2.99E-14 |
| Niger-Congo         | Northern European | Nilo-Saharan      | -8.37  | 2.80E-17 | 8.13E-14 |
| Niger-Congo         | Japanese          | Cushitic          | -8.28  | 5.92E-17 | 1.72E-13 |
| OmotiC              | Arabian           | Cushitic          | -8.17  | 1.52E-16 | 4.43E-13 |
| Niger-Congo         | Kalash            | Indian            | -8.16  | 1.61E-16 | 4.68E-13 |
| Nilo-Saharan        | Chinese           | Indian            | -8.09  | 3.06E-16 | 8.90E-13 |
| Khoisan             | Chinese           | Siberian          | -8.04  | 4.53E-16 | 1.32E-12 |
| Pygmy               | Native American   | Nilo-Saharan      | -7.87  | 1.71E-15 | 4.97E-12 |
| Khoisan             | Indian            | Cushitic          | -7.85  | 2.08E-15 | 6.05E-12 |
| Cushitic            | Native American   | Berber            | -7.77  | 3.88E-15 | 1.13E-11 |
| Khoisan             | Northern European | Indian            | -7.77  | 3.99E-15 | 1.16E-11 |
| Berber              | Khoisan           | Niger-Congo       | -7.73  | 5.41E-15 | 1.57E-11 |
| Khoisan             | Siberian          | Cushitic          | -7.72  | 5.97E-15 | 1.74E-11 |
| Khoisan             | Siberian          | Indian            | -7.69  | 7.11E-15 | 2.07E-11 |
| Japanese            | Pygmy             | Nilo-Saharan      | -7.66  | 9.05E-15 | 2.63E-11 |
| Melanesian          | Siberian          | Japanese          | -7.46  | 4.28E-14 | 1.24E-10 |
| Nilo-Saharan        | Kalash            | Berber            | -7.29  | 1.52E-13 | 4.42E-10 |
| Niger-Congo         | Siberian          | Japanese          | -7.20  | 2.93E-13 | 8.51E-10 |
| Melanesian          | Southern European | Northern European | -7.18  | 3.47E-13 | 1.01E-09 |
| Berber              | Pygmy             | Niger-Congo       | -7.11  | 5.89E-13 | 1.71E-09 |
| Khoisan             | Kalash            | Berber            | -7.10  | 6.25E-13 | 1.82E-09 |
| Levantine-Caucasian | Native American   | Northern European | -6.99  | 1.42E-12 | 4.14E-09 |
| Nilo-Saharan        | Native American   | Japanese          | -6.94  | 1.90E-12 | 5.52E-09 |
| Southeast Asian     | Siberian          | Chinese           | -6.66  | 1.33E-11 | 3.86E-08 |
| Berber              | Nilo-Saharan      | Cushitic          | -6.65  | 1.47E-11 | 4.27E-08 |
| Southeast Asian     | Niger-Congo       | Cushitic          | -6.62  | 1.82E-11 | 5.29E-08 |
| Levantine-Caucasian | Chinese           | Siberian          | -6.32  | 1.28E-10 | 3.73E-07 |
| Pygmy               | Native American   | Cushitic          | -6.21  | 2.73E-10 | 7.93E-07 |
| Pygmy               | Chinese           | Indian            | -6.02  | 8.82E-10 | 2.56E-06 |
| Levantine-Caucasian | OmotiC            | Berber            | -5.56  | 1.32E-08 | 3.84E-05 |
| Melanesian          | Native American   | Japanese          | -5.39  | 3.57E-08 | 1.04E-04 |

|                     |                   |                   |       |          |          |
|---------------------|-------------------|-------------------|-------|----------|----------|
| Nilo-Saharan        | Native American   | Siberian          | -5.35 | 4.42E-08 | 1.29E-04 |
| Melanesian          | Niger-Congo       | Japanese          | -5.24 | 8.09E-08 | 2.35E-04 |
| Pygmy               | Arabian           | Niger-Congo       | -5.21 | 9.61E-08 | 2.79E-04 |
| Niger-Congo         | Chinese           | Berber            | -5.17 | 1.16E-07 | 3.36E-04 |
| Pygmy               | Chinese           | Niger-Congo       | -5.14 | 1.40E-07 | 4.07E-04 |
| Southern European   | Native American   | Kalash            | -5.05 | 2.22E-07 | 6.46E-04 |
| Southern European   | Japanese          | Siberian          | -4.98 | 3.15E-07 | 9.15E-04 |
| Pygmy               | Indian            | Nilo-Saharan      | -4.96 | 3.56E-07 | 1.04E-03 |
| Khoisan             | Siberian          | Japanese          | -4.84 | 6.36E-07 | 1.85E-03 |
| Berber              | Pygmy             | Nilo-Saharan      | -4.83 | 6.89E-07 | 2.00E-03 |
| Khoisan             | Chinese           | Berber            | -4.80 | 7.85E-07 | 2.28E-03 |
| Melanesian          | Berber            | Indian            | -4.55 | 2.67E-06 | 7.76E-03 |
| Southern European   | Khoisan           | Indian            | -4.48 | 3.69E-06 | 0.0107   |
| Melanesian          | Nilo-Saharan      | Cushitic          | -4.44 | 4.46E-06 | 0.0130   |
| Berber              | Chinese           | Indian            | -4.39 | 5.72E-06 | 0.0166   |
| Khoisan             | Kalash            | Indian            | -4.38 | 5.86E-06 | 0.0170   |
| Niger-Congo         | Arabian           | Nilo-Saharan      | -4.33 | 7.39E-06 | 0.0215   |
| Nilo-Saharan        | Chinese           | Southeast Asian   | -4.23 | 1.17E-05 | 0.0340   |
| Khoisan             | Niger-Congo       | Pygmy             | -4.23 | 1.19E-05 | 0.0345   |
| Niger-Congo         | Siberian          | Nilo-Saharan      | -4.21 | 1.26E-05 | 0.0367   |
| Southern European   | Nilo-Saharan      | Arabian           | -3.98 | 3.42E-05 | 0.0995   |
| Arabian             | Native American   | Indian            | -3.96 | 3.69E-05 | 0.107    |
| Japanese            | Northern European | Indian            | -3.90 | 4.84E-05 | 0.141    |
| Southern European   | Chinese           | Berber            | -3.86 | 5.77E-05 | 0.168    |
| Niger-Congo         | Siberian          | Berber            | -3.62 | 1.48E-04 | 0.429    |
| Levantine-Caucasian | Siberian          | Indian            | -3.59 | 1.63E-04 | 0.473    |
| Khoisan             | Kalash            | Nilo-Saharan      | -3.56 | 1.86E-04 | 0.541    |
| Omotiic             | Native American   | Indian            | -3.56 | 1.87E-04 | 0.542    |
| Melanesian          | Khoisan           | Nilo-Saharan      | -3.51 | 2.24E-04 | 0.652    |
| Levantine-Caucasian | Omotiic           | Cushitic          | -3.05 | 1.14E-03 | 1        |
| Pygmy               | Chinese           | Cushitic          | -2.79 | 2.64E-03 | 1        |
| Levantine-Caucasian | Native American   | Kalash            | -2.60 | 4.72E-03 | 1        |
| Southern European   | Siberian          | Northern European | -2.15 | 0.0158   | 1        |
| Southeast Asian     | Khoisan           | Japanese          | -2.10 | 0.0177   | 1        |
| Chinese             | Arabian           | Siberian          | -2.04 | 0.0207   | 1        |
| Khoisan             | Arabian           | Niger-Congo       | -2.03 | 0.0210   | 1        |
| Khoisan             | Cushitic          | Nilo-Saharan      | -1.97 | 0.0245   | 1        |
| Khoisan             | Cushitic          | Pygmy             | -1.88 | 0.0300   | 1        |
| Pygmy               | Siberian          | Nilo-Saharan      | -1.79 | 0.0369   | 1        |
| Omotiic             | Arabian           | Berber            | -1.68 | 0.0469   | 1        |
| Southern European   | Pygmy             | Arabian           | -1.60 | 0.0546   | 1        |
| Nilo-Saharan        | Siberian          | Japanese          | -1.60 | 0.0546   | 1        |
| Berber              | Nilo-Saharan      | Omotiic           | -1.52 | 0.0644   | 1        |
| Melanesian          | Cushitic          | Berber            | -1.31 | 0.0946   | 1        |
| Niger-Congo         | Native American   | Kalash            | -1.21 | 0.112    | 1        |
| Nilo-Saharan        | Chinese           | Cushitic          | -1.07 | 0.143    | 1        |
| Pygmy               | Native American   | Siberian          | -0.84 | 0.199    | 1        |
| Niger-Congo         | Indian            | Cushitic          | -0.81 | 0.209    | 1        |
| Melanesian          | Khoisan           | Cushitic          | -0.66 | 0.253    | 1        |
| Khoisan             | Japanese          | Niger-Congo       | -0.10 | 0.460    | 1        |
| Southern European   | Japanese          | Northern European | 0.19  | 0.577    | 1        |



|                     |                   |                     |      |       |   |
|---------------------|-------------------|---------------------|------|-------|---|
| Khoisan             | Native American   | Niger-Congo         | 0.28 | 0.612 | 1 |
| Melanesian          | Nilo-Saharan      | Berber              | 0.41 | 0.658 | 1 |
| Levantine-Caucasian | Japanese          | Siberian            | 0.44 | 0.672 | 1 |
| Southern European   | Siberian          | Indian              | 0.50 | 0.691 | 1 |
| Khoisan             | Japanese          | Siberian            | 0.71 | 0.760 | 1 |
| Pygmy               | Indian            | Niger-Congo         | 0.79 | 0.784 | 1 |
| Southern European   | Chinese           | Southeast Asian     | 0.88 | 0.809 | 1 |
| Khoisan             | Indian            | Niger-Congo         | 0.88 | 0.810 | 1 |
| Melanesian          | Northern European | Kalash              | 0.97 | 0.833 | 1 |
| Pygmy               | Kalash            | Nilo-Saharan        | 0.98 | 0.837 | 1 |
| Nilo-Saharan        | Kalash            | Indian              | 0.98 | 0.837 | 1 |
| Niger-Congo         | Chinese           | Siberian            | 1.02 | 0.846 | 1 |
| Southeast Asian     | Niger-Congo       | Japanese            | 1.03 | 0.850 | 1 |
| Southeast Asian     | Cushitic          | Indian              | 1.17 | 0.878 | 1 |
| Pygmy               | Chinese           | Southeast Asian     | 1.23 | 0.890 | 1 |
| Khoisan             | Nilo-Saharan      | Pygmy               | 1.66 | 0.952 | 1 |
| Melanesian          | Niger-Congo       | Southeast Asian     | 1.99 | 0.976 | 1 |
| Pygmy               | Native American   | Berber              | 2.02 | 0.978 | 1 |
| Southeast Asian     | Native American   | Chinese             | 2.02 | 0.978 | 1 |
| Southern European   | Chinese           | Kalash              | 2.03 | 0.979 | 1 |
| Southeast Asian     | Berber            | Indian              | 2.31 | 0.990 | 1 |
| Southeast Asian     | Khoisan           | Niger-Congo         | 2.32 | 0.990 | 1 |
| Nilo-Saharan        | Siberian          | Indian              | 2.49 | 0.994 | 1 |
| Melanesian          | Native American   | Siberian            | 2.49 | 0.994 | 1 |
| Southeast Asian     | Nilo-Saharan      | Indian              | 2.62 | 0.996 | 1 |
| Chinese             | Kalash            | Indian              | 2.64 | 0.996 | 1 |
| Melanesian          | Japanese          | Chinese             | 2.75 | 0.997 | 1 |
| Southern European   | Khoisan           | Levantine-Caucasian | 2.80 | 0.997 | 1 |
| Melanesian          | Pygmy             | Nilo-Saharan        | 2.84 | 0.998 | 1 |
| Pygmy               | Native American   | Japanese            | 2.85 | 0.998 | 1 |
| Berber              | Native American   | Northern European   | 3.15 | 0.999 | 1 |
| Japanese            | Cushitic          | Indian              | 3.18 | 0.999 | 1 |
| Pygmy               | Cushitic          | Nilo-Saharan        | 3.18 | 0.999 | 1 |
| Cushitic            | Chinese           | Berber              | 3.18 | 0.999 | 1 |
| Japanese            | Arabian           | Siberian            | 3.37 | 1     | 1 |
| Levantine-Caucasian | Chinese           | Kalash              | 3.54 | 1     | 1 |
| Arabian             | Native American   | Northern European   | 3.57 | 1     | 1 |
| Omotc               | Northern European | Cushitic            | 3.69 | 1     | 1 |
| Southern European   | Niger-Congo       | Levantine-Caucasian | 3.72 | 1     | 1 |
| Melanesian          | Pygmy             | Indian              | 3.74 | 1     | 1 |
| Nilo-Saharan        | Siberian          | Cushitic            | 3.74 | 1     | 1 |
| Southeast Asian     | Japanese          | Chinese             | 3.86 | 1     | 1 |
| Levantine-Caucasian | Khoisan           | Indian              | 3.87 | 1     | 1 |
| Pygmy               | Kalash            | Berber              | 3.91 | 1     | 1 |
| Japanese            | Nilo-Saharan      | Indian              | 4.03 | 1     | 1 |
| Khoisan             | Japanese          | Southeast Asian     | 4.16 | 1     | 1 |
| Niger-Congo         | Japanese          | Chinese             | 4.34 | 1     | 1 |
| Melanesian          | Omotc             | Indian              | 4.51 | 1     | 1 |
| Khoisan             | Japanese          | Chinese             | 4.58 | 1     | 1 |
| Southern European   | Southeast Asian   | Northern European   | 4.59 | 1     | 1 |
| Japanese            | Pygmy             | Niger-Congo         | 4.59 | 1     | 1 |

|                     |                     |                 |      |   |   |
|---------------------|---------------------|-----------------|------|---|---|
| Melanesian          | Southern European   | Arabian         | 4.68 | 1 | 1 |
| Pygmy               | Siberian            | Japanese        | 4.76 | 1 | 1 |
| Niger-Congo         | Kalash              | Nilo-Saharan    | 4.83 | 1 | 1 |
| Japanese            | Pygmy               | Indian          | 4.91 | 1 | 1 |
| Southeast Asian     | Pygmy               | Niger-Congo     | 4.96 | 1 | 1 |
| Southeast Asian     | Kalash              | Indian          | 5.18 | 1 | 1 |
| Melanesian          | Arabian             | Kalash          | 5.22 | 1 | 1 |
| Niger-Congo         | Indian              | Nilo-Saharan    | 5.47 | 1 | 1 |
| Southeast Asian     | Pygmy               | Indian          | 5.52 | 1 | 1 |
| Pygmy               | Native American     | Niger-Congo     | 5.79 | 1 | 1 |
| Southern European   | Southeast Asian     | Japanese        | 5.81 | 1 | 1 |
| Niger-Congo         | Northern European   | Indian          | 5.82 | 1 | 1 |
| Pygmy               | Kalash              | Indian          | 5.95 | 1 | 1 |
| Pygmy               | Indian              | Cushitic        | 6.01 | 1 | 1 |
| Melanesian          | Kalash              | Indian          | 6.10 | 1 | 1 |
| Cushitic            | Chinese             | Southeast Asian | 6.13 | 1 | 1 |
| Levantine-Caucasian | Chinese             | Southeast Asian | 6.25 | 1 | 1 |
| Berber              | Chinese             | Siberian        | 6.30 | 1 | 1 |
| Arabian             | Native American     | Kalash          | 6.32 | 1 | 1 |
| Khoisan             | Northern European   | Arabian         | 6.43 | 1 | 1 |
| Melanesian          | Khoisan             | Berber          | 6.58 | 1 | 1 |
| Pygmy               | Siberian            | Indian          | 7.07 | 1 | 1 |
| Southern European   | Niger-Congo         | Indian          | 7.09 | 1 | 1 |
| Japanese            | Nilo-Saharan        | Chinese         | 7.29 | 1 | 1 |
| Southeast Asian     | Northern European   | Japanese        | 7.37 | 1 | 1 |
| Pygmy               | Chinese             | Siberian        | 7.47 | 1 | 1 |
| Niger-Congo         | Japanese            | Siberian        | 7.52 | 1 | 1 |
| Berber              | Native American     | Indian          | 7.53 | 1 | 1 |
| Southern European   | Southeast Asian     | Berber          | 7.68 | 1 | 1 |
| Southern European   | Japanese            | Berber          | 7.69 | 1 | 1 |
| Pygmy               | Cushitic            | Niger-Congo     | 7.77 | 1 | 1 |
| Southeast Asian     | Nilo-Saharan        | Japanese        | 7.78 | 1 | 1 |
| Niger-Congo         | Japanese            | Berber          | 7.83 | 1 | 1 |
| Niger-Congo         | Japanese            | Southeast Asian | 7.92 | 1 | 1 |
| Berber              | Japanese            | Indian          | 7.94 | 1 | 1 |
| Melanesian          | Niger-Congo         | Siberian        | 7.97 | 1 | 1 |
| Khoisan             | Native American     | Southeast Asian | 8.12 | 1 | 1 |
| Pygmy               | Siberian            | Cushitic        | 8.13 | 1 | 1 |
| Cushitic            | Chinese             | Siberian        | 8.14 | 1 | 1 |
| Japanese            | Pygmy               | Cushitic        | 8.34 | 1 | 1 |
| Khoisan             | Siberian            | Berber          | 8.38 | 1 | 1 |
| Japanese            | Pygmy               | Chinese         | 8.41 | 1 | 1 |
| Chinese             | Kalash              | Siberian        | 8.41 | 1 | 1 |
| Japanese            | Nilo-Saharan        | Cushitic        | 8.59 | 1 | 1 |
| Melanesian          | Southern European   | Siberian        | 8.71 | 1 | 1 |
| Southeast Asian     | Levantine-Caucasian | Japanese        | 8.77 | 1 | 1 |
| Arabian             | Siberian            | Indian          | 8.90 | 1 | 1 |
| Berber              | Niger-Congo         | Omotic          | 8.92 | 1 | 1 |
| Southeast Asian     | Pygmy               | Japanese        | 9.04 | 1 | 1 |
| Nilo-Saharan        | Indian              | Cushitic        | 9.11 | 1 | 1 |
| Melanesian          | Northern European   | Siberian        | 9.21 | 1 | 1 |

|                     |                     |                     |       |   |   |
|---------------------|---------------------|---------------------|-------|---|---|
| Melanesian          | Niger-Congo         | Kalash              | 9.29  | 1 | 1 |
| Southern European   | Southeast Asian     | Kalash              | 9.58  | 1 | 1 |
| Southeast Asian     | Levantine-Caucasian | Kalash              | 9.72  | 1 | 1 |
| Nilo-Saharan        | Native American     | Kalash              | 9.78  | 1 | 1 |
| Nilo-Saharan        | Chinese             | Siberian            | 9.80  | 1 | 1 |
| Melanesian          | Pygmy               | Cushitic            | 9.86  | 1 | 1 |
| Pygmy               | Kalash              | Niger-Congo         | 9.90  | 1 | 1 |
| Levantine-Caucasian | Japanese            | Kalash              | 9.91  | 1 | 1 |
| Levantine-Caucasian | Khoisan             | Arabian             | 9.94  | 1 | 1 |
| Chinese             | Arabian             | Southeast Asian     | 10.04 | 1 | 1 |
| Southeast Asian     | Pygmy               | Cushitic            | 10.06 | 1 | 1 |
| Cushitic            | Native American     | Kalash              | 10.13 | 1 | 1 |
| Pygmy               | Siberian            | Niger-Congo         | 10.16 | 1 | 1 |
| Melanesian          | Nilo-Saharan        | Japanese            | 10.21 | 1 | 1 |
| Chinese             | Omotc               | Southeast Asian     | 10.24 | 1 | 1 |
| Japanese            | Kalash              | Indian              | 10.29 | 1 | 1 |
| Melanesian          | Southeast Asian     | Japanese            | 10.38 | 1 | 1 |
| Southern European   | Japanese            | Kalash              | 10.42 | 1 | 1 |
| Southern European   | Native American     | Berber              | 10.43 | 1 | 1 |
| Melanesian          | Southern European   | Japanese            | 10.60 | 1 | 1 |
| Omotc               | Siberian            | Japanese            | 10.65 | 1 | 1 |
| Southern European   | Japanese            | Chinese             | 10.74 | 1 | 1 |
| Cushitic            | Native American     | Siberian            | 10.86 | 1 | 1 |
| Khoisan             | Cushitic            | Niger-Congo         | 10.92 | 1 | 1 |
| Omotc               | Native American     | Siberian            | 10.95 | 1 | 1 |
| Southeast Asian     | Nilo-Saharan        | Cushitic            | 11.00 | 1 | 1 |
| Khoisan             | Siberian            | Niger-Congo         | 11.06 | 1 | 1 |
| Southeast Asian     | Arabian             | Japanese            | 11.06 | 1 | 1 |
| Japanese            | Pygmy               | Siberian            | 11.06 | 1 | 1 |
| Cushitic            | Siberian            | Indian              | 11.15 | 1 | 1 |
| Khoisan             | Japanese            | Berber              | 11.39 | 1 | 1 |
| Berber              | Japanese            | Siberian            | 11.49 | 1 | 1 |
| Chinese             | Native American     | Siberian            | 11.57 | 1 | 1 |
| Pygmy               | Northern European   | Indian              | 11.92 | 1 | 1 |
| Southeast Asian     | Niger-Congo         | Berber              | 11.94 | 1 | 1 |
| Cushitic            | Siberian            | Berber              | 12.05 | 1 | 1 |
| Japanese            | Kalash              | Siberian            | 12.09 | 1 | 1 |
| Japanese            | Arabian             | Chinese             | 12.19 | 1 | 1 |
| Melanesian          | Siberian            | Chinese             | 12.20 | 1 | 1 |
| Chinese             | Northern European   | Southeast Asian     | 12.23 | 1 | 1 |
| Japanese            | Nilo-Saharan        | Siberian            | 12.30 | 1 | 1 |
| Japanese            | Cushitic            | Siberian            | 12.59 | 1 | 1 |
| Japanese            | Cushitic            | Berber              | 12.63 | 1 | 1 |
| Niger-Congo         | Native American     | Southeast Asian     | 12.71 | 1 | 1 |
| Japanese            | Omotc               | Chinese             | 12.80 | 1 | 1 |
| Pygmy               | Native American     | Kalash              | 12.83 | 1 | 1 |
| Southern European   | Pygmy               | Indian              | 12.97 | 1 | 1 |
| Levantine-Caucasian | Japanese            | Chinese             | 13.02 | 1 | 1 |
| Melanesian          | Southern European   | Levantine-Caucasian | 13.08 | 1 | 1 |
| Cushitic            | Native American     | Arabian             | 13.34 | 1 | 1 |
| Japanese            | Nilo-Saharan        | Southeast Asian     | 13.46 | 1 | 1 |

|                     |                     |                     |       |   |   |
|---------------------|---------------------|---------------------|-------|---|---|
| Chinese             | Omotc               | Indian              | 13.50 | 1 | 1 |
| Melanesian          | Niger-Congo         | Chinese             | 13.56 | 1 | 1 |
| Cushitic            | Native American     | Northern European   | 13.65 | 1 | 1 |
| Khoisan             | Kalash              | Niger-Congo         | 13.99 | 1 | 1 |
| Melanesian          | Khoisan             | Japanese            | 14.00 | 1 | 1 |
| Melanesian          | Northern European   | Japanese            | 14.15 | 1 | 1 |
| Southeast Asian     | Khoisan             | Berber              | 14.15 | 1 | 1 |
| Melanesian          | Arabian             | Berber              | 14.37 | 1 | 1 |
| Japanese            | Northern European   | Chinese             | 14.45 | 1 | 1 |
| Southeast Asian     | Cushitic            | Berber              | 14.49 | 1 | 1 |
| Cushitic            | Kalash              | Berber              | 14.54 | 1 | 1 |
| Levantine-Caucasian | Siberian            | Kalash              | 14.66 | 1 | 1 |
| Southern European   | Native American     | Siberian            | 14.71 | 1 | 1 |
| Melanesian          | Chinese             | Southeast Asian     | 14.77 | 1 | 1 |
| Japanese            | Pygmy               | Southeast Asian     | 14.89 | 1 | 1 |
| Japanese            | Cushitic            | Chinese             | 15.10 | 1 | 1 |
| Niger-Congo         | Native American     | Chinese             | 15.37 | 1 | 1 |
| Omotc               | Native American     | Japanese            | 15.83 | 1 | 1 |
| Melanesian          | Cushitic            | Kalash              | 15.89 | 1 | 1 |
| Melanesian          | Levantine-Caucasian | Berber              | 16.19 | 1 | 1 |
| Berber              | Chinese             | Southeast Asian     | 16.21 | 1 | 1 |
| Khoisan             | Northern European   | Kalash              | 16.34 | 1 | 1 |
| Melanesian          | Nilo-Saharan        | Southeast Asian     | 16.36 | 1 | 1 |
| Southern European   | Chinese             | Arabian             | 16.44 | 1 | 1 |
| Khoisan             | Northern European   | Levantine-Caucasian | 16.59 | 1 | 1 |
| Southern European   | Nilo-Saharan        | Levantine-Caucasian | 16.74 | 1 | 1 |
| Southeast Asian     | Native American     | Siberian            | 16.85 | 1 | 1 |
| Southern European   | Khoisan             | Northern European   | 16.86 | 1 | 1 |
| Southern European   | Siberian            | Kalash              | 17.06 | 1 | 1 |
| Southern European   | Pygmy               | Levantine-Caucasian | 17.07 | 1 | 1 |
| Melanesian          | Khoisan             | Kalash              | 17.29 | 1 | 1 |
| Berber              | Japanese            | Chinese             | 17.33 | 1 | 1 |
| Southeast Asian     | Berber              | Japanese            | 17.35 | 1 | 1 |
| Cushitic            | Siberian            | Japanese            | 17.47 | 1 | 1 |
| Nilo-Saharan        | Northern European   | Indian              | 17.62 | 1 | 1 |
| Nilo-Saharan        | Siberian            | Berber              | 17.65 | 1 | 1 |
| Omotc               | Native American     | Berber              | 17.66 | 1 | 1 |
| Omotc               | Siberian            | Indian              | 17.79 | 1 | 1 |
| Berber              | Native American     | Kalash              | 17.84 | 1 | 1 |
| Melanesian          | Berber              | Kalash              | 18.03 | 1 | 1 |
| Chinese             | Arabian             | Kalash              | 18.05 | 1 | 1 |
| Melanesian          | Khoisan             | Siberian            | 18.14 | 1 | 1 |
| Melanesian          | Levantine-Caucasian | Northern European   | 18.19 | 1 | 1 |
| Southeast Asian     | Khoisan             | Chinese             | 18.50 | 1 | 1 |
| Japanese            | Kalash              | Chinese             | 18.50 | 1 | 1 |
| Southern European   | Omotc               | Arabian             | 18.52 | 1 | 1 |
| Khoisan             | Native American     | Chinese             | 18.63 | 1 | 1 |
| Melanesian          | Levantine-Caucasian | Siberian            | 18.66 | 1 | 1 |
| Southern European   | Khoisan             | Kalash              | 18.77 | 1 | 1 |
| Chinese             | Omotc               | Siberian            | 18.88 | 1 | 1 |
| Southeast Asian     | Khoisan             | Siberian            | 18.90 | 1 | 1 |

|                     |                     |                     |       |   |   |
|---------------------|---------------------|---------------------|-------|---|---|
| Southeast Asian     | Cushitic            | Japanese            | 18.98 | 1 | 1 |
| Southeast Asian     | Northern European   | Siberian            | 19.02 | 1 | 1 |
| Melanesian          | Levantine-Caucasian | Japanese            | 19.03 | 1 | 1 |
| Melanesian          | Southern European   | Southeast Asian     | 19.08 | 1 | 1 |
| Southeast Asian     | Omotoc              | Indian              | 19.09 | 1 | 1 |
| Levantine-Caucasian | Cushitic            | Berber              | 19.10 | 1 | 1 |
| Melanesian          | Cushitic            | Arabian             | 19.13 | 1 | 1 |
| Southeast Asian     | Omotoc              | Japanese            | 19.20 | 1 | 1 |
| Melanesian          | Native American     | Chinese             | 19.35 | 1 | 1 |
| Melanesian          | Khoisan             | Southeast Asian     | 19.36 | 1 | 1 |
| Melanesian          | Pygmy               | Niger-Congo         | 19.42 | 1 | 1 |
| Japanese            | Omotoc              | Siberian            | 19.59 | 1 | 1 |
| Nilo-Saharan        | Chinese             | Berber              | 19.62 | 1 | 1 |
| Kalash              | Omotoc              | Berber              | 19.82 | 1 | 1 |
| Melanesian          | Nilo-Saharan        | Siberian            | 19.83 | 1 | 1 |
| Southern European   | Nilo-Saharan        | Indian              | 19.85 | 1 | 1 |
| Arabian             | Native American     | Siberian            | 19.87 | 1 | 1 |
| Melanesian          | Pygmy               | Berber              | 19.91 | 1 | 1 |
| Japanese            | Native American     | Siberian            | 19.94 | 1 | 1 |
| Southeast Asian     | Kalash              | Japanese            | 20.04 | 1 | 1 |
| Khoisan             | Indian              | Berber              | 20.07 | 1 | 1 |
| Pygmy               | Chinese             | Berber              | 20.11 | 1 | 1 |
| Southern European   | Niger-Congo         | Northern European   | 20.12 | 1 | 1 |
| Southern European   | Southeast Asian     | Siberian            | 20.13 | 1 | 1 |
| Japanese            | Omotoc              | Indian              | 20.33 | 1 | 1 |
| Southern European   | Chinese             | Levantine-Caucasian | 20.65 | 1 | 1 |
| Cushitic            | Native American     | Japanese            | 20.76 | 1 | 1 |
| Chinese             | Indian              | Southeast Asian     | 20.79 | 1 | 1 |
| Niger-Congo         | Indian              | Berber              | 20.87 | 1 | 1 |
| Levantine-Caucasian | Niger-Congo         | Indian              | 21.15 | 1 | 1 |
| Niger-Congo         | Native American     | Northern European   | 21.29 | 1 | 1 |
| Melanesian          | Nilo-Saharan        | Kalash              | 21.29 | 1 | 1 |
| Melanesian          | Southeast Asian     | Chinese             | 21.39 | 1 | 1 |
| Chinese             | Arabian             | Berber              | 21.53 | 1 | 1 |
| Japanese            | Indian              | Chinese             | 21.57 | 1 | 1 |
| Melanesian          | Native American     | Southeast Asian     | 21.60 | 1 | 1 |
| Omotoc              | Native American     | Kalash              | 21.73 | 1 | 1 |
| Niger-Congo         | Siberian            | Chinese             | 21.79 | 1 | 1 |
| Khoisan             | Siberian            | Southeast Asian     | 22.01 | 1 | 1 |
| Berber              | Siberian            | Indian              | 22.13 | 1 | 1 |
| Southeast Asian     | Niger-Congo         | Chinese             | 22.40 | 1 | 1 |
| Southern European   | Siberian            | Japanese            | 22.50 | 1 | 1 |
| Melanesian          | Niger-Congo         | Pygmy               | 22.67 | 1 | 1 |
| Arabian             | Native American     | Berber              | 22.68 | 1 | 1 |
| Omotoc              | Native American     | Cushitic            | 22.70 | 1 | 1 |
| Kalash              | Omotoc              | Indian              | 22.74 | 1 | 1 |
| Southern European   | Siberian            | Berber              | 22.78 | 1 | 1 |
| Southern European   | Japanese            | Southeast Asian     | 22.79 | 1 | 1 |
| Southeast Asian     | Arabian             | Kalash              | 22.84 | 1 | 1 |
| Kalash              | Omotoc              | Cushitic            | 22.88 | 1 | 1 |
| Levantine-Caucasian | Pygmy               | Indian              | 22.91 | 1 | 1 |

|                     |                     |                     |       |   |   |
|---------------------|---------------------|---------------------|-------|---|---|
| Japanese            | Omotc               | Southeast Asian     | 23.22 | 1 | 1 |
| Levantine-Caucasian | Khoisan             | Kalash              | 23.24 | 1 | 1 |
| Japanese            | Native American     | Chinese             | 23.36 | 1 | 1 |
| Melanesian          | Khoisan             | Niger-Congo         | 23.41 | 1 | 1 |
| Melanesian          | Japanese            | Southeast Asian     | 23.59 | 1 | 1 |
| Berber              | Native American     | Siberian            | 23.63 | 1 | 1 |
| Khoisan             | Omotc               | Pygmy               | 23.67 | 1 | 1 |
| Southern European   | Native American     | Levantine-Caucasian | 23.69 | 1 | 1 |
| Levantine-Caucasian | Siberian            | Japanese            | 23.71 | 1 | 1 |
| Indian              | Siberian            | Japanese            | 23.72 | 1 | 1 |
| Melanesian          | Arabian             | Japanese            | 23.75 | 1 | 1 |
| Nilo-Saharan        | Native American     | Southeast Asian     | 23.76 | 1 | 1 |
| Khoisan             | Chinese             | Kalash              | 23.79 | 1 | 1 |
| Chinese             | Kalash              | Southeast Asian     | 23.80 | 1 | 1 |
| Japanese            | Arabian             | Kalash              | 23.82 | 1 | 1 |
| Japanese            | Cushitic            | Southeast Asian     | 23.86 | 1 | 1 |
| Melanesian          | Arabian             | Siberian            | 24.00 | 1 | 1 |
| Cushitic            | Northern European   | Arabian             | 24.02 | 1 | 1 |
| Khoisan             | Siberian            | Chinese             | 24.12 | 1 | 1 |
| Pygmy               | Siberian            | Berber              | 24.22 | 1 | 1 |
| Berber              | Siberian            | Japanese            | 24.38 | 1 | 1 |
| Melanesian          | Cushitic            | Japanese            | 24.53 | 1 | 1 |
| Melanesian          | Pygmy               | Japanese            | 24.67 | 1 | 1 |
| Khoisan             | Siberian            | Kalash              | 24.67 | 1 | 1 |
| Levantine-Caucasian | Chinese             | Northern European   | 24.77 | 1 | 1 |
| Niger-Congo         | Northern European   | Levantine-Caucasian | 24.84 | 1 | 1 |
| Levantine-Caucasian | Niger-Congo         | Arabian             | 25.11 | 1 | 1 |
| Pygmy               | Native American     | Southeast Asian     | 25.24 | 1 | 1 |
| Melanesian          | Levantine-Caucasian | Southeast Asian     | 25.45 | 1 | 1 |
| Melanesian          | Omotc               | Berber              | 25.46 | 1 | 1 |
| Southeast Asian     | Pygmy               | Chinese             | 25.51 | 1 | 1 |
| Cushitic            | Kalash              | Levantine-Caucasian | 25.53 | 1 | 1 |
| Arabian             | Siberian            | Japanese            | 25.62 | 1 | 1 |
| Levantine-Caucasian | Siberian            | Northern European   | 25.77 | 1 | 1 |
| Melanesian          | Northern European   | Southeast Asian     | 25.83 | 1 | 1 |
| Nilo-Saharan        | Cushitic            | Omotc               | 25.96 | 1 | 1 |
| Levantine-Caucasian | Native American     | Siberian            | 26.06 | 1 | 1 |
| Cushitic            | Native American     | Levantine-Caucasian | 26.14 | 1 | 1 |
| Berber              | Omotc               | Cushitic            | 26.16 | 1 | 1 |
| Melanesian          | Cushitic            | Siberian            | 26.23 | 1 | 1 |
| Niger-Congo         | Northern European   | Arabian             | 26.53 | 1 | 1 |
| Southeast Asian     | Levantine-Caucasian | Siberian            | 26.70 | 1 | 1 |
| Nilo-Saharan        | Siberian            | Chinese             | 26.75 | 1 | 1 |
| Kalash              | Native American     | Indian              | 26.90 | 1 | 1 |
| Melanesian          | Levantine-Caucasian | Arabian             | 26.97 | 1 | 1 |
| Southeast Asian     | Arabian             | Berber              | 27.09 | 1 | 1 |
| Southern European   | Pygmy               | Northern European   | 27.14 | 1 | 1 |
| Southern European   | Native American     | Arabian             | 27.16 | 1 | 1 |
| Levantine-Caucasian | Japanese            | Southeast Asian     | 27.21 | 1 | 1 |
| Southern European   | Southeast Asian     | Arabian             | 27.22 | 1 | 1 |
| Berber              | Niger-Congo         | Nilo-Saharan        | 27.29 | 1 | 1 |

|                     |                     |                     |       |   |   |
|---------------------|---------------------|---------------------|-------|---|---|
| Kalash              | Siberian            | Indian              | 27.33 | 1 | 1 |
| Melanesian          | Omotc               | Cushitic            | 27.43 | 1 | 1 |
| Arabian             | Siberian            | Kalash              | 27.44 | 1 | 1 |
| Pygmy               | Northern European   | Arabian             | 27.55 | 1 | 1 |
| Khoisan             | Native American     | Arabian             | 27.61 | 1 | 1 |
| Cushitic            | Kalash              | Arabian             | 27.83 | 1 | 1 |
| Melanesian          | Siberian            | Southeast Asian     | 27.84 | 1 | 1 |
| Niger-Congo         | Siberian            | Southeast Asian     | 27.97 | 1 | 1 |
| Levantine-Caucasian | Pygmy               | Arabian             | 28.02 | 1 | 1 |
| Nilo-Saharan        | Native American     | Chinese             | 28.09 | 1 | 1 |
| Melanesian          | Cushitic            | Southeast Asian     | 28.12 | 1 | 1 |
| Southeast Asian     | Northern European   | Chinese             | 28.15 | 1 | 1 |
| Niger-Congo         | Cushitic            | Nilo-Saharan        | 28.18 | 1 | 1 |
| Southern European   | Southeast Asian     | Chinese             | 28.26 | 1 | 1 |
| Pygmy               | Northern European   | Kalash              | 28.26 | 1 | 1 |
| Japanese            | Arabian             | Southeast Asian     | 28.26 | 1 | 1 |
| Japanese            | Nilo-Saharan        | Berber              | 28.36 | 1 | 1 |
| Melanesian          | Berber              | Arabian             | 28.64 | 1 | 1 |
| Southeast Asian     | Nilo-Saharan        | Chinese             | 28.65 | 1 | 1 |
| Melanesian          | Pygmy               | Southeast Asian     | 28.69 | 1 | 1 |
| Japanese            | Arabian             | Berber              | 28.80 | 1 | 1 |
| Chinese             | Northern European   | Kalash              | 28.90 | 1 | 1 |
| Southeast Asian     | Arabian             | Siberian            | 29.05 | 1 | 1 |
| Melanesian          | Pygmy               | Siberian            | 29.06 | 1 | 1 |
| Southeast Asian     | Niger-Congo         | Siberian            | 29.09 | 1 | 1 |
| Southern European   | Japanese            | Arabian             | 29.12 | 1 | 1 |
| Khoisan             | Native American     | Northern European   | 29.13 | 1 | 1 |
| Southeast Asian     | Pygmy               | Siberian            | 29.17 | 1 | 1 |
| Melanesian          | Nilo-Saharan        | Chinese             | 29.39 | 1 | 1 |
| Pygmy               | Siberian            | Chinese             | 29.49 | 1 | 1 |
| Southern European   | Pygmy               | Kalash              | 29.54 | 1 | 1 |
| Chinese             | Indian              | Siberian            | 29.56 | 1 | 1 |
| Japanese            | Pygmy               | Berber              | 29.64 | 1 | 1 |
| Melanesian          | Omotc               | Japanese            | 29.90 | 1 | 1 |
| Niger-Congo         | Omotc               | Nilo-Saharan        | 30.05 | 1 | 1 |
| Cushitic            | Indian              | Berber              | 30.35 | 1 | 1 |
| Melanesian          | Pygmy               | Kalash              | 30.65 | 1 | 1 |
| Native American     | Siberian            | Japanese            | 30.71 | 1 | 1 |
| Southeast Asian     | Chinese             | Japanese            | 30.77 | 1 | 1 |
| Southeast Asian     | Pygmy               | Berber              | 30.79 | 1 | 1 |
| Niger-Congo         | Kalash              | Levantine-Caucasian | 30.79 | 1 | 1 |
| Southeast Asian     | Northern European   | Kalash              | 30.83 | 1 | 1 |
| Southeast Asian     | Indian              | Japanese            | 30.92 | 1 | 1 |
| Pygmy               | Northern European   | Levantine-Caucasian | 30.97 | 1 | 1 |
| Melanesian          | Northern European   | Berber              | 31.11 | 1 | 1 |
| Southeast Asian     | Nilo-Saharan        | Berber              | 31.25 | 1 | 1 |
| Southeast Asian     | Levantine-Caucasian | Chinese             | 31.47 | 1 | 1 |
| Pygmy               | Native American     | Chinese             | 31.63 | 1 | 1 |
| Melanesian          | Berber              | Siberian            | 31.67 | 1 | 1 |
| Japanese            | Indian              | Siberian            | 31.67 | 1 | 1 |
| Nilo-Saharan        | Northern European   | Levantine-Caucasian | 31.80 | 1 | 1 |

|                     |                   |                     |       |   |   |
|---------------------|-------------------|---------------------|-------|---|---|
| Berber              | Kalash            | Levantine-Caucasian | 31.80 | 1 | 1 |
| Southeast Asian     | Arabian           | Chinese             | 31.83 | 1 | 1 |
| Southeast Asian     | Khoisan           | Kalash              | 31.86 | 1 | 1 |
| Levantine-Caucasian | Nilo-Saharan      | Indian              | 32.04 | 1 | 1 |
| Chinese             | Omotc             | Cushitic            | 32.09 | 1 | 1 |
| Cushitic            | Chinese           | Arabian             | 32.15 | 1 | 1 |
| Melanesian          | Berber            | Japanese            | 32.43 | 1 | 1 |
| Khoisan             | Japanese          | Kalash              | 32.47 | 1 | 1 |
| Niger-Congo         | Cushitic          | Omotc               | 32.48 | 1 | 1 |
| Khoisan             | Arabian           | Indian              | 32.50 | 1 | 1 |
| Melanesian          | Arabian           | Southeast Asian     | 32.51 | 1 | 1 |
| Southern European   | Southeast Asian   | Levantine-Caucasian | 32.65 | 1 | 1 |
| Southern European   | Nilo-Saharan      | Northern European   | 32.95 | 1 | 1 |
| Southern European   | Cushitic          | Arabian             | 33.02 | 1 | 1 |
| Melanesian          | Niger-Congo       | Arabian             | 33.07 | 1 | 1 |
| Berber              | Native American   | Levantine-Caucasian | 33.09 | 1 | 1 |
| Melanesian          | Japanese          | Siberian            | 33.15 | 1 | 1 |
| Kalash              | Siberian          | Japanese            | 33.18 | 1 | 1 |
| Berber              | Japanese          | Southeast Asian     | 33.25 | 1 | 1 |
| Arabian             | Native American   | Levantine-Caucasian | 33.34 | 1 | 1 |
| Melanesian          | Arabian           | Levantine-Caucasian | 33.35 | 1 | 1 |
| Nilo-Saharan        | Siberian          | Southeast Asian     | 33.39 | 1 | 1 |
| Northern European   | Siberian          | Indian              | 33.39 | 1 | 1 |
| Pygmy               | Siberian          | Southeast Asian     | 33.44 | 1 | 1 |
| Nilo-Saharan        | Northern European | Arabian             | 33.48 | 1 | 1 |
| Melanesian          | Omotc             | Southeast Asian     | 33.65 | 1 | 1 |
| Japanese            | Northern European | Southeast Asian     | 33.71 | 1 | 1 |
| Southern European   | Japanese          | Levantine-Caucasian | 33.97 | 1 | 1 |
| Niger-Congo         | Native American   | Arabian             | 34.09 | 1 | 1 |
| Cushitic            | Siberian          | Arabian             | 34.16 | 1 | 1 |
| Melanesian          | Omotc             | Kalash              | 34.17 | 1 | 1 |
| Omotc               | Siberian          | Cushitic            | 34.19 | 1 | 1 |
| Indian              | Native American   | Siberian            | 34.42 | 1 | 1 |
| Melanesian          | Southern European | Chinese             | 34.45 | 1 | 1 |
| Japanese            | Northern European | Kalash              | 34.57 | 1 | 1 |
| Southeast Asian     | Omotc             | Chinese             | 34.58 | 1 | 1 |
| Levantine-Caucasian | Japanese          | Northern European   | 34.60 | 1 | 1 |
| Melanesian          | Chinese           | Siberian            | 34.84 | 1 | 1 |
| Levantine-Caucasian | Chinese           | Berber              | 34.89 | 1 | 1 |
| Cushitic            | Northern European | Levantine-Caucasian | 34.89 | 1 | 1 |
| Melanesian          | Arabian           | Northern European   | 34.95 | 1 | 1 |
| Southern European   | Native American   | Japanese            | 35.04 | 1 | 1 |
| Khoisan             | Kalash            | Arabian             | 35.10 | 1 | 1 |
| Berber              | Chinese           | Kalash              | 35.20 | 1 | 1 |
| Pygmy               | Indian            | Berber              | 35.29 | 1 | 1 |
| Levantine-Caucasian | Nilo-Saharan      | Arabian             | 35.41 | 1 | 1 |
| Berber              | Native American   | Arabian             | 35.41 | 1 | 1 |
| Melanesian          | Omotc             | Siberian            | 35.44 | 1 | 1 |
| Southeast Asian     | Nilo-Saharan      | Siberian            | 35.50 | 1 | 1 |
| Omotc               | Siberian          | Berber              | 35.66 | 1 | 1 |
| Arabian             | Siberian          | Berber              | 35.78 | 1 | 1 |



|                     |                     |                     |       |   |   |
|---------------------|---------------------|---------------------|-------|---|---|
| Northern European   | Siberian            | Japanese            | 35.85 | 1 | 1 |
| Southeast Asian     | Berber              | Siberian            | 35.96 | 1 | 1 |
| Nilo-Saharan        | Indian              | Berber              | 35.97 | 1 | 1 |
| Omotiic             | Siberian            | Chinese             | 36.31 | 1 | 1 |
| Cushitic            | Siberian            | Kalash              | 36.32 | 1 | 1 |
| Southeast Asian     | Berber              | Chinese             | 36.39 | 1 | 1 |
| Khoisan             | Nilo-Saharan        | Niger-Congo         | 36.57 | 1 | 1 |
| Melanesian          | Northern European   | Chinese             | 36.69 | 1 | 1 |
| Southeast Asian     | Kalash              | Siberian            | 36.70 | 1 | 1 |
| Niger-Congo         | Siberian            | Kalash              | 36.83 | 1 | 1 |
| Levantine-Caucasian | Pygmy               | Kalash              | 37.27 | 1 | 1 |
| Melanesian          | Berber              | Northern European   | 37.29 | 1 | 1 |
| Berber              | Siberian            | Kalash              | 37.32 | 1 | 1 |
| Melanesian          | Cushitic            | Levantine-Caucasian | 37.39 | 1 | 1 |
| Cushitic            | Chinese             | Kalash              | 37.39 | 1 | 1 |
| Japanese            | Omotiic             | Cushitic            | 37.51 | 1 | 1 |
| Arabian             | Native American     | Japanese            | 37.54 | 1 | 1 |
| Khoisan             | Kalash              | Levantine-Caucasian | 37.68 | 1 | 1 |
| Southeast Asian     | Kalash              | Chinese             | 37.76 | 1 | 1 |
| Berber              | Siberian            | Northern European   | 37.79 | 1 | 1 |
| Pygmy               | Siberian            | Kalash              | 37.80 | 1 | 1 |
| Southern European   | Siberian            | Arabian             | 38.07 | 1 | 1 |
| Melanesian          | Kalash              | Siberian            | 38.18 | 1 | 1 |
| Melanesian          | Khoisan             | Chinese             | 38.57 | 1 | 1 |
| Southeast Asian     | Cushitic            | Chinese             | 38.58 | 1 | 1 |
| Melanesian          | Berber              | Levantine-Caucasian | 38.71 | 1 | 1 |
| Niger-Congo         | Kalash              | Arabian             | 38.87 | 1 | 1 |
| Melanesian          | Berber              | Southeast Asian     | 38.87 | 1 | 1 |
| Southeast Asian     | Omotiic             | Cushitic            | 38.90 | 1 | 1 |
| Southeast Asian     | Berber              | Kalash              | 38.91 | 1 | 1 |
| Southeast Asian     | Levantine-Caucasian | Northern European   | 39.01 | 1 | 1 |
| Omotiic             | Northern European   | Levantine-Caucasian | 39.03 | 1 | 1 |
| Japanese            | Kalash              | Southeast Asian     | 39.12 | 1 | 1 |
| Berber              | Native American     | Japanese            | 39.16 | 1 | 1 |
| Nilo-Saharan        | Kalash              | Levantine-Caucasian | 39.35 | 1 | 1 |
| Berber              | Japanese            | Kalash              | 39.51 | 1 | 1 |
| Southern European   | Niger-Congo         | Kalash              | 39.62 | 1 | 1 |
| Southeast Asian     | Cushitic            | Siberian            | 39.80 | 1 | 1 |
| Chinese             | Omotiic             | Berber              | 40.01 | 1 | 1 |
| Melanesian          | Levantine-Caucasian | Chinese             | 40.13 | 1 | 1 |
| Kalash              | Native American     | Siberian            | 40.31 | 1 | 1 |
| Japanese            | Indian              | Southeast Asian     | 40.32 | 1 | 1 |
| Omotiic             | Native American     | Southeast Asian     | 40.62 | 1 | 1 |
| Niger-Congo         | Northern European   | Kalash              | 40.63 | 1 | 1 |
| Indian              | Omotiic             | Cushitic            | 40.69 | 1 | 1 |
| Melanesian          | Nilo-Saharan        | Niger-Congo         | 40.76 | 1 | 1 |
| Nilo-Saharan        | Native American     | Northern European   | 40.80 | 1 | 1 |
| Japanese            | Cushitic            | Kalash              | 40.97 | 1 | 1 |
| Japanese            | Cushitic            | Arabian             | 41.01 | 1 | 1 |
| Melanesian          | Indian              | Japanese            | 41.20 | 1 | 1 |
| Melanesian          | Kalash              | Japanese            | 41.59 | 1 | 1 |

|                     |                     |                     |       |   |   |
|---------------------|---------------------|---------------------|-------|---|---|
| Southern European   | Omotc               | Levantine-Caucasian | 41.62 | 1 | 1 |
| Native American     | Northern European   | Kalash              | 41.87 | 1 | 1 |
| Khoisan             | Nilo-Saharan        | Omotc               | 41.91 | 1 | 1 |
| Omotc               | Northern European   | Arabian             | 41.99 | 1 | 1 |
| Nilo-Saharan        | Siberian            | Kalash              | 42.14 | 1 | 1 |
| Levantine-Caucasian | Native American     | Berber              | 42.37 | 1 | 1 |
| Pygmy               | Chinese             | Kalash              | 42.41 | 1 | 1 |
| Southeast Asian     | Cushitic            | Kalash              | 42.48 | 1 | 1 |
| Southern European   | Siberian            | Levantine-Caucasian | 42.50 | 1 | 1 |
| Berber              | Chinese             | Arabian             | 42.51 | 1 | 1 |
| Pygmy               | Kalash              | Levantine-Caucasian | 42.55 | 1 | 1 |
| Southeast Asian     | Levantine-Caucasian | Berber              | 42.57 | 1 | 1 |
| Omotc               | Siberian            | Southeast Asian     | 42.68 | 1 | 1 |
| Southeast Asian     | Omotc               | Siberian            | 42.70 | 1 | 1 |
| Cushitic            | Arabian             | Berber              | 42.80 | 1 | 1 |
| Native American     | Northern European   | Siberian            | 42.95 | 1 | 1 |
| Arabian             | Siberian            | Northern European   | 42.95 | 1 | 1 |
| Indian              | Native American     | Japanese            | 43.13 | 1 | 1 |
| Nilo-Saharan        | Northern European   | Kalash              | 43.15 | 1 | 1 |
| Levantine-Caucasian | Japanese            | Berber              | 43.17 | 1 | 1 |
| Native American     | Northern European   | Indian              | 43.17 | 1 | 1 |
| Melanesian          | Nilo-Saharan        | Pygmy               | 43.37 | 1 | 1 |
| Pygmy               | Arabian             | Indian              | 43.43 | 1 | 1 |
| Melanesian          | Pygmy               | Khoisan             | 43.48 | 1 | 1 |
| Southeast Asian     | Cushitic            | Arabian             | 44.17 | 1 | 1 |
| Japanese            | Omotc               | Berber              | 44.20 | 1 | 1 |
| Khoisan             | Native American     | Levantine-Caucasian | 44.28 | 1 | 1 |
| Melanesian          | Northern European   | Levantine-Caucasian | 44.29 | 1 | 1 |
| Levantine-Caucasian | Native American     | Japanese            | 44.50 | 1 | 1 |
| Niger-Congo         | Native American     | Levantine-Caucasian | 44.71 | 1 | 1 |
| Southern European   | Nilo-Saharan        | Kalash              | 44.84 | 1 | 1 |
| Kalash              | Omotc               | Levantine-Caucasian | 44.85 | 1 | 1 |
| Melanesian          | Cushitic            | Omotc               | 44.93 | 1 | 1 |
| Nilo-Saharan        | Chinese             | Niger-Congo         | 44.96 | 1 | 1 |
| Cushitic            | Kalash              | Indian              | 45.03 | 1 | 1 |
| Nilo-Saharan        | Native American     | Niger-Congo         | 45.10 | 1 | 1 |
| Pygmy               | Kalash              | Arabian             | 45.15 | 1 | 1 |
| Melanesian          | Niger-Congo         | Northern European   | 45.30 | 1 | 1 |
| Omotc               | Native American     | Chinese             | 45.31 | 1 | 1 |
| Khoisan             | Arabian             | Kalash              | 45.40 | 1 | 1 |
| Chinese             | Arabian             | Northern European   | 45.59 | 1 | 1 |
| Khoisan             | Indian              | Kalash              | 45.79 | 1 | 1 |
| Niger-Congo         | Native American     | Pygmy               | 45.87 | 1 | 1 |
| Japanese            | Siberian            | Chinese             | 45.89 | 1 | 1 |
| Berber              | Chinese             | Northern European   | 45.93 | 1 | 1 |
| Melanesian          | Pygmy               | Chinese             | 46.02 | 1 | 1 |
| Pygmy               | Nilo-Saharan        | Niger-Congo         | 46.16 | 1 | 1 |
| Pygmy               | Native American     | Northern European   | 46.18 | 1 | 1 |
| Southeast Asian     | Omotc               | Berber              | 46.23 | 1 | 1 |
| Northern European   | Siberian            | Kalash              | 46.36 | 1 | 1 |
| Southern European   | Nilo-Saharan        | Niger-Congo         | 46.38 | 1 | 1 |

|                     |                   |                     |       |   |   |
|---------------------|-------------------|---------------------|-------|---|---|
| Melanesian          | Cushitic          | Chinese             | 46.44 | 1 | 1 |
| Southeast Asian     | Berber            | Arabian             | 46.50 | 1 | 1 |
| Omotc               | Native American   | Northern European   | 46.52 | 1 | 1 |
| Levantine-Caucasian | Omotc             | Arabian             | 46.59 | 1 | 1 |
| Cushitic            | Northern European | Southern European   | 46.63 | 1 | 1 |
| Japanese            | Pygmy             | Kalash              | 46.63 | 1 | 1 |
| Nilo-Saharan        | Kalash            | Arabian             | 46.66 | 1 | 1 |
| Melanesian          | Cushitic          | Northern European   | 46.81 | 1 | 1 |
| Melanesian          | Indian            | Southeast Asian     | 46.87 | 1 | 1 |
| Melanesian          | Northern European | Arabian             | 47.11 | 1 | 1 |
| Berber              | Siberian          | Arabian             | 47.23 | 1 | 1 |
| Southeast Asian     | Pygmy             | Kalash              | 47.30 | 1 | 1 |
| Chinese             | Arabian           | Levantine-Caucasian | 47.56 | 1 | 1 |
| Melanesian          | Omotc             | Chinese             | 47.62 | 1 | 1 |
| Nilo-Saharan        | Native American   | Arabian             | 47.62 | 1 | 1 |
| Cushitic            | Siberian          | Chinese             | 47.67 | 1 | 1 |
| Niger-Congo         | Arabian           | Indian              | 47.70 | 1 | 1 |
| Melanesian          | Southeast Asian   | Siberian            | 47.84 | 1 | 1 |
| Khoisan             | Northern European | Southern European   | 47.85 | 1 | 1 |
| Omotc               | Northern European | Indian              | 47.86 | 1 | 1 |
| Omotc               | Siberian          | Kalash              | 47.99 | 1 | 1 |
| Melanesian          | Indian            | Siberian            | 48.46 | 1 | 1 |
| Levantine-Caucasian | Chinese           | Arabian             | 48.56 | 1 | 1 |
| Melanesian          | Nilo-Saharan      | Arabian             | 48.57 | 1 | 1 |
| Berber              | Japanese          | Arabian             | 48.63 | 1 | 1 |
| Melanesian          | Kalash            | Southeast Asian     | 48.82 | 1 | 1 |
| Berber              | Native American   | Southern European   | 48.89 | 1 | 1 |
| Melanesian          | Khoisan           | Arabian             | 48.97 | 1 | 1 |
| Niger-Congo         | Chinese           | Kalash              | 49.10 | 1 | 1 |
| Cushitic            | Native American   | Southeast Asian     | 49.21 | 1 | 1 |
| Levantine-Caucasian | Khoisan           | Northern European   | 49.38 | 1 | 1 |
| Levantine-Caucasian | Niger-Congo       | Kalash              | 49.50 | 1 | 1 |
| Southern European   | Kalash            | Levantine-Caucasian | 49.55 | 1 | 1 |
| Levantine-Caucasian | Cushitic          | Arabian             | 49.65 | 1 | 1 |
| Pygmy               | Omotc             | Nilo-Saharan        | 49.71 | 1 | 1 |
| Indian              | Omotc             | Berber              | 49.74 | 1 | 1 |
| Melanesian          | Niger-Congo       | Levantine-Caucasian | 49.82 | 1 | 1 |
| Berber              | Chinese           | Levantine-Caucasian | 49.92 | 1 | 1 |
| Southern European   | Kalash            | Northern European   | 50.04 | 1 | 1 |
| Melanesian          | Arabian           | Chinese             | 50.10 | 1 | 1 |
| Khoisan             | Arabian           | Levantine-Caucasian | 50.10 | 1 | 1 |
| Kalash              | Omotc             | Arabian             | 50.34 | 1 | 1 |
| Melanesian          | Berber            | Southern European   | 50.34 | 1 | 1 |
| Pygmy               | Native American   | Arabian             | 50.60 | 1 | 1 |
| Niger-Congo         | Kalash            | Northern European   | 50.62 | 1 | 1 |
| Berber              | Kalash            | Arabian             | 50.64 | 1 | 1 |
| Kalash              | Arabian           | Levantine-Caucasian | 50.82 | 1 | 1 |
| Southern European   | Indian            | Kalash              | 51.05 | 1 | 1 |
| Khoisan             | Kalash            | Northern European   | 51.08 | 1 | 1 |
| Nilo-Saharan        | Northern European | Niger-Congo         | 51.45 | 1 | 1 |
| Levantine-Caucasian | Siberian          | Berber              | 51.50 | 1 | 1 |

|                     |                     |                     |       |   |   |
|---------------------|---------------------|---------------------|-------|---|---|
| Berber              | Siberian            | Levantine-Caucasian | 51.54 | 1 | 1 |
| Berber              | Japanese            | Northern European   | 51.67 | 1 | 1 |
| Japanese            | Nilo-Saharan        | Niger-Congo         | 51.85 | 1 | 1 |
| Southeast Asian     | Niger-Congo         | Kalash              | 52.01 | 1 | 1 |
| Niger-Congo         | Japanese            | Kalash              | 52.02 | 1 | 1 |
| Cushitic            | Indian              | Arabian             | 52.06 | 1 | 1 |
| Southeast Asian     | Indian              | Chinese             | 52.17 | 1 | 1 |
| Southeast Asian     | Arabian             | Levantine-Caucasian | 52.26 | 1 | 1 |
| Melanesian          | Arabian             | Southern European   | 52.31 | 1 | 1 |
| Japanese            | Arabian             | Northern European   | 52.34 | 1 | 1 |
| Levantine-Caucasian | Nilo-Saharan        | Kalash              | 52.54 | 1 | 1 |
| Melanesian          | Native American     | Indian              | 52.61 | 1 | 1 |
| Southeast Asian     | Berber              | Northern European   | 52.75 | 1 | 1 |
| Southern European   | Indian              | Northern European   | 52.78 | 1 | 1 |
| Southeast Asian     | Nilo-Saharan        | Niger-Congo         | 52.82 | 1 | 1 |
| Japanese            | Arabian             | Levantine-Caucasian | 52.88 | 1 | 1 |
| Nilo-Saharan        | Siberian            | Niger-Congo         | 52.97 | 1 | 1 |
| Arabian             | Siberian            | Levantine-Caucasian | 53.14 | 1 | 1 |
| Cushitic            | Siberian            | Southeast Asian     | 53.38 | 1 | 1 |
| Pygmy               | Arabian             | Kalash              | 53.42 | 1 | 1 |
| Melanesian          | Indian              | Kalash              | 53.77 | 1 | 1 |
| Omotc               | Native American     | Arabian             | 53.80 | 1 | 1 |
| Southeast Asian     | Berber              | Levantine-Caucasian | 53.89 | 1 | 1 |
| Berber              | Indian              | Levantine-Caucasian | 54.03 | 1 | 1 |
| Southeast Asian     | Arabian             | Northern European   | 54.31 | 1 | 1 |
| Levantine-Caucasian | Nilo-Saharan        | Niger-Congo         | 54.84 | 1 | 1 |
| Cushitic            | Siberian            | Levantine-Caucasian | 55.02 | 1 | 1 |
| Pygmy               | Native American     | Khoisan             | 55.04 | 1 | 1 |
| Berber              | Japanese            | Levantine-Caucasian | 55.05 | 1 | 1 |
| Cushitic            | Native American     | Southern European   | 55.14 | 1 | 1 |
| Levantine-Caucasian | Native American     | Arabian             | 55.21 | 1 | 1 |
| Chinese             | Native American     | Southeast Asian     | 55.23 | 1 | 1 |
| Berber              | Kalash              | Northern European   | 55.32 | 1 | 1 |
| Pygmy               | Arabian             | Levantine-Caucasian | 55.41 | 1 | 1 |
| Melanesian          | Berber              | Chinese             | 55.57 | 1 | 1 |
| Omotc               | Northern European   | Kalash              | 55.57 | 1 | 1 |
| Melanesian          | Levantine-Caucasian | Southern European   | 55.62 | 1 | 1 |
| Melanesian          | Southern European   | Cushitic            | 55.74 | 1 | 1 |
| Melanesian          | Berber              | Cushitic            | 55.83 | 1 | 1 |
| Melanesian          | Omotc               | Nilo-Saharan        | 55.84 | 1 | 1 |
| Berber              | Kalash              | Southern European   | 56.05 | 1 | 1 |
| Indian              | Native American     | Kalash              | 56.18 | 1 | 1 |
| Southeast Asian     | Levantine-Caucasian | Arabian             | 56.24 | 1 | 1 |
| Niger-Congo         | Arabian             | Levantine-Caucasian | 56.33 | 1 | 1 |
| Southern European   | Indian              | Berber              | 56.59 | 1 | 1 |
| Nilo-Saharan        | Chinese             | Kalash              | 56.84 | 1 | 1 |
| Pygmy               | Indian              | Kalash              | 57.22 | 1 | 1 |
| Cushitic            | Chinese             | Levantine-Caucasian | 57.24 | 1 | 1 |
| Japanese            | Nilo-Saharan        | Kalash              | 57.32 | 1 | 1 |
| Southern European   | Indian              | Levantine-Caucasian | 57.41 | 1 | 1 |
| Nilo-Saharan        | Arabian             | Indian              | 57.54 | 1 | 1 |

|                     |                   |                     |       |   |   |
|---------------------|-------------------|---------------------|-------|---|---|
| Nilo-Saharan        | Kalash            | Niger-Congo         | 57.62 | 1 | 1 |
| Cushitic            | Native American   | Chinese             | 57.63 | 1 | 1 |
| Levantine-Caucasian | Japanese          | Arabian             | 57.76 | 1 | 1 |
| Melanesian          | Omotc             | Arabian             | 57.78 | 1 | 1 |
| Khoisan             | Niger-Congo       | Nilo-Saharan        | 57.84 | 1 | 1 |
| Berber              | Indian            | Arabian             | 57.87 | 1 | 1 |
| Pygmy               | Kalash            | Northern European   | 57.87 | 1 | 1 |
| Berber              | Siberian          | Chinese             | 58.42 | 1 | 1 |
| Southeast Asian     | Nilo-Saharan      | Kalash              | 58.47 | 1 | 1 |
| Southern European   | Pygmy             | Khoisan             | 58.58 | 1 | 1 |
| Cushitic            | Siberian          | Northern European   | 58.66 | 1 | 1 |
| Nilo-Saharan        | Kalash            | Northern European   | 58.98 | 1 | 1 |
| Arabian             | Siberian          | Chinese             | 58.99 | 1 | 1 |
| Kalash              | Native American   | Japanese            | 58.99 | 1 | 1 |
| Arabian             | Native American   | Southern European   | 59.01 | 1 | 1 |
| Khoisan             | Siberian          | Arabian             | 59.07 | 1 | 1 |
| Southern European   | Siberian          | Chinese             | 59.16 | 1 | 1 |
| Southern European   | Omotc             | Northern European   | 59.17 | 1 | 1 |
| Melanesian          | Cushitic          | Southern European   | 59.23 | 1 | 1 |
| Melanesian          | Arabian           | Cushitic            | 59.35 | 1 | 1 |
| Pygmy               | Chinese           | Khoisan             | 59.35 | 1 | 1 |
| Nilo-Saharan        | Native American   | Levantine-Caucasian | 59.38 | 1 | 1 |
| Indian              | Siberian          | Chinese             | 59.41 | 1 | 1 |
| Levantine-Caucasian | Siberian          | Chinese             | 59.44 | 1 | 1 |
| Melanesian          | Pygmy             | Arabian             | 59.46 | 1 | 1 |
| Chinese             | Omotc             | Kalash              | 59.72 | 1 | 1 |
| Southern European   | Omotc             | Indian              | 59.74 | 1 | 1 |
| Levantine-Caucasian | Indian            | Kalash              | 59.84 | 1 | 1 |
| Berber              | Nilo-Saharan      | Niger-Congo         | 59.97 | 1 | 1 |
| Nilo-Saharan        | Arabian           | Niger-Congo         | 59.99 | 1 | 1 |
| Southeast Asian     | Omotc             | Kalash              | 60.35 | 1 | 1 |
| Japanese            | Omotc             | Kalash              | 60.68 | 1 | 1 |
| Southeast Asian     | Pygmy             | Khoisan             | 61.13 | 1 | 1 |
| Niger-Congo         | Siberian          | Pygmy               | 61.15 | 1 | 1 |
| Nilo-Saharan        | Indian            | Niger-Congo         | 61.41 | 1 | 1 |
| Khoisan             | Omotc             | Nilo-Saharan        | 61.65 | 1 | 1 |
| Melanesian          | Native American   | Kalash              | 61.84 | 1 | 1 |
| Khoisan             | Chinese           | Arabian             | 61.85 | 1 | 1 |
| Levantine-Caucasian | Pygmy             | Northern European   | 61.87 | 1 | 1 |
| Pygmy               | Native American   | Levantine-Caucasian | 62.04 | 1 | 1 |
| Indian              | Arabian           | Kalash              | 62.08 | 1 | 1 |
| Japanese            | Pygmy             | Khoisan             | 62.11 | 1 | 1 |
| Omotc               | Native American   | Levantine-Caucasian | 62.20 | 1 | 1 |
| Levantine-Caucasian | Siberian          | Arabian             | 62.36 | 1 | 1 |
| Nilo-Saharan        | Native American   | Pygmy               | 62.48 | 1 | 1 |
| Niger-Congo         | Chinese           | Pygmy               | 62.72 | 1 | 1 |
| Pygmy               | Northern European | Southern European   | 62.90 | 1 | 1 |
| Berber              | Indian            | Kalash              | 63.04 | 1 | 1 |
| Berber              | Siberian          | Southern European   | 63.22 | 1 | 1 |
| Pygmy               | Siberian          | Khoisan             | 63.59 | 1 | 1 |
| Southeast Asian     | Niger-Congo       | Pygmy               | 63.79 | 1 | 1 |

|                     |                     |                     |       |   |   |
|---------------------|---------------------|---------------------|-------|---|---|
| Japanese            | Cushitic            | Levantine-Caucasian | 63.86 | 1 | 1 |
| Cushitic            | Native American     | Omotc               | 63.97 | 1 | 1 |
| Niger-Congo         | Northern European   | Southern European   | 64.00 | 1 | 1 |
| Kalash              | Omotc               | Northern European   | 64.01 | 1 | 1 |
| Southern European   | Siberian            | Southeast Asian     | 64.19 | 1 | 1 |
| Indian              | Northern European   | Kalash              | 64.40 | 1 | 1 |
| Omotc               | Native American     | Nilo-Saharan        | 64.53 | 1 | 1 |
| Southeast Asian     | Indian              | Siberian            | 64.58 | 1 | 1 |
| Arabian             | Northern European   | Berber              | 64.69 | 1 | 1 |
| Levantine-Caucasian | Pygmy               | Khoisan             | 64.72 | 1 | 1 |
| Niger-Congo         | Japanese            | Pygmy               | 64.74 | 1 | 1 |
| Pygmy               | Arabian             | Khoisan             | 64.78 | 1 | 1 |
| Nilo-Saharan        | Arabian             | Levantine-Caucasian | 64.88 | 1 | 1 |
| Melanesian          | Kalash              | Chinese             | 64.90 | 1 | 1 |
| Cushitic            | Kalash              | Northern European   | 65.03 | 1 | 1 |
| Melanesian          | Nilo-Saharan        | Northern European   | 65.05 | 1 | 1 |
| Melanesian          | Nilo-Saharan        | Levantine-Caucasian | 65.20 | 1 | 1 |
| Levantine-Caucasian | Omotc               | Indian              | 65.41 | 1 | 1 |
| Pygmy               | Northern European   | Khoisan             | 65.55 | 1 | 1 |
| Chinese             | Northern European   | Berber              | 65.83 | 1 | 1 |
| Levantine-Caucasian | Niger-Congo         | Northern European   | 65.90 | 1 | 1 |
| Pygmy               | Omotc               | Niger-Congo         | 66.07 | 1 | 1 |
| Southern European   | Omotc               | Kalash              | 66.34 | 1 | 1 |
| Pygmy               | Kalash              | Khoisan             | 66.44 | 1 | 1 |
| Berber              | Siberian            | Southeast Asian     | 66.56 | 1 | 1 |
| Melanesian          | Northern European   | Southern European   | 66.89 | 1 | 1 |
| Southeast Asian     | Cushitic            | Levantine-Caucasian | 66.96 | 1 | 1 |
| Cushitic            | Indian              | Levantine-Caucasian | 66.97 | 1 | 1 |
| Kalash              | Siberian            | Chinese             | 66.98 | 1 | 1 |
| Niger-Congo         | Arabian             | Kalash              | 66.98 | 1 | 1 |
| Cushitic            | Indian              | Kalash              | 66.99 | 1 | 1 |
| Berber              | Chinese             | Southern European   | 67.10 | 1 | 1 |
| Arabian             | Siberian            | Southeast Asian     | 67.11 | 1 | 1 |
| Southeast Asian     | Northern European   | Berber              | 67.15 | 1 | 1 |
| Cushitic            | Kalash              | Southern European   | 67.20 | 1 | 1 |
| Southern European   | Indian              | Arabian             | 67.34 | 1 | 1 |
| Melanesian          | Indian              | Chinese             | 67.55 | 1 | 1 |
| Levantine-Caucasian | Siberian            | Southeast Asian     | 67.79 | 1 | 1 |
| Levantine-Caucasian | Omotc               | Kalash              | 67.84 | 1 | 1 |
| Southeast Asian     | Berber              | Southern European   | 68.23 | 1 | 1 |
| Chinese             | Omotc               | Nilo-Saharan        | 68.86 | 1 | 1 |
| Berber              | Northern European   | Southern European   | 68.98 | 1 | 1 |
| Indian              | Arabian             | Levantine-Caucasian | 69.24 | 1 | 1 |
| Omotc               | Northern European   | Southern European   | 69.30 | 1 | 1 |
| Niger-Congo         | Kalash              | Pygmy               | 69.36 | 1 | 1 |
| Levantine-Caucasian | Khoisan             | Southern European   | 69.37 | 1 | 1 |
| Cushitic            | Chinese             | Omotc               | 69.40 | 1 | 1 |
| Indian              | Arabian             | Berber              | 69.41 | 1 | 1 |
| Khoisan             | Niger-Congo         | Omotc               | 69.42 | 1 | 1 |
| Niger-Congo         | Indian              | Kalash              | 69.57 | 1 | 1 |
| Melanesian          | Levantine-Caucasian | Cushitic            | 69.61 | 1 | 1 |

|                   |                   |                     |       |   |   |
|-------------------|-------------------|---------------------|-------|---|---|
| Native American   | Siberian          | Chinese             | 69.65 | 1 | 1 |
| Southern European | Native American   | Southeast Asian     | 70.03 | 1 | 1 |
| Berber            | Japanese          | Southern European   | 70.07 | 1 | 1 |
| Melanesian        | Khoisan           | Levantine-Caucasian | 70.23 | 1 | 1 |
| Southern European | Kalash            | Berber              | 70.42 | 1 | 1 |
| Berber            | Native American   | Southeast Asian     | 70.51 | 1 | 1 |
| Berber            | Kalash            | Indian              | 71.00 | 1 | 1 |
| Japanese          | Native American   | Southeast Asian     | 71.00 | 1 | 1 |
| Nilo-Saharan      | Arabian           | Kalash              | 71.11 | 1 | 1 |
| Indian            | Siberian          | Southeast Asian     | 71.14 | 1 | 1 |
| Melanesian        | OmotiC            | Levantine-Caucasian | 71.18 | 1 | 1 |
| Melanesian        | Khoisan           | Northern European   | 71.52 | 1 | 1 |
| Indian            | OmotiC            | Kalash              | 71.62 | 1 | 1 |
| Nilo-Saharan      | Northern European | Southern European   | 71.65 | 1 | 1 |
| Pygmy             | Indian            | Khoisan             | 71.70 | 1 | 1 |
| Japanese          | OmotiC            | Nilo-Saharan        | 71.88 | 1 | 1 |
| Kalash            | Arabian           | Berber              | 72.03 | 1 | 1 |
| Southeast Asian   | Berber            | Cushitic            | 72.11 | 1 | 1 |
| Arabian           | Northern European | Southern European   | 72.18 | 1 | 1 |
| OmotiC            | Siberian          | Nilo-Saharan        | 72.30 | 1 | 1 |
| Niger-Congo       | Siberian          | Arabian             | 72.31 | 1 | 1 |
| Khoisan           | Japanese          | Arabian             | 72.34 | 1 | 1 |
| Southeast Asian   | OmotiC            | Nilo-Saharan        | 72.35 | 1 | 1 |
| Nilo-Saharan      | Indian            | Kalash              | 72.48 | 1 | 1 |
| Japanese          | Northern European | Berber              | 72.52 | 1 | 1 |
| Arabian           | Native American   | Southeast Asian     | 72.53 | 1 | 1 |
| Melanesian        | OmotiC            | Pygmy               | 72.85 | 1 | 1 |
| Native American   | Northern European | Japanese            | 73.29 | 1 | 1 |
| Pygmy             | Nilo-Saharan      | OmotiC              | 73.34 | 1 | 1 |
| Pygmy             | Siberian          | Arabian             | 73.38 | 1 | 1 |
| Chinese           | Arabian           | Southern European   | 73.43 | 1 | 1 |
| Kalash            | Native American   | Northern European   | 73.50 | 1 | 1 |
| Berber            | Khoisan           | Arabian             | 73.60 | 1 | 1 |
| Cushitic          | Chinese           | Northern European   | 73.65 | 1 | 1 |
| Melanesian        | OmotiC            | Northern European   | 73.72 | 1 | 1 |
| Berber            | Chinese           | Cushitic            | 73.76 | 1 | 1 |
| Khoisan           | Arabian           | Southern European   | 74.00 | 1 | 1 |
| Southern European | Arabian           | Berber              | 74.32 | 1 | 1 |
| Southeast Asian   | Khoisan           | Arabian             | 74.43 | 1 | 1 |
| Southeast Asian   | Cushitic          | OmotiC              | 74.48 | 1 | 1 |
| OmotiC            | Siberian          | Arabian             | 74.49 | 1 | 1 |
| Japanese          | Cushitic          | OmotiC              | 74.61 | 1 | 1 |
| Berber            | Indian            | Northern European   | 74.74 | 1 | 1 |
| Kalash            | Siberian          | Southeast Asian     | 75.16 | 1 | 1 |
| Southern European | Kalash            | Arabian             | 75.26 | 1 | 1 |
| Berber            | Native American   | Cushitic            | 75.32 | 1 | 1 |
| Khoisan           | Siberian          | Northern European   | 75.39 | 1 | 1 |
| Southeast Asian   | Arabian           | Southern European   | 75.59 | 1 | 1 |
| Arabian           | Siberian          | Southern European   | 75.74 | 1 | 1 |
| Melanesian        | Pygmy             | Levantine-Caucasian | 75.81 | 1 | 1 |
| Northern European | Siberian          | Chinese             | 75.90 | 1 | 1 |

|                     |                     |                     |       |   |   |
|---------------------|---------------------|---------------------|-------|---|---|
| Khoisan             | Indian              | Arabian             | 76.10 | 1 | 1 |
| Khoisan             | Kalash              | Southern European   | 76.37 | 1 | 1 |
| Melanesian          | Pygmy               | Northern European   | 76.94 | 1 | 1 |
| Arabian             | Northern European   | Levantine-Caucasian | 76.98 | 1 | 1 |
| Melanesian          | Kalash              | Berber              | 77.07 | 1 | 1 |
| Levantine-Caucasian | Nilo-Saharan        | Northern European   | 77.17 | 1 | 1 |
| Nilo-Saharan        | Siberian            | Pygmy               | 77.33 | 1 | 1 |
| Japanese            | Arabian             | Southern European   | 77.35 | 1 | 1 |
| Japanese            | Cushitic            | Northern European   | 77.51 | 1 | 1 |
| Berber              | Indian              | Southern European   | 77.55 | 1 | 1 |
| Indian              | Native American     | Southeast Asian     | 77.57 | 1 | 1 |
| Omotiic             | Arabian             | Levantine-Caucasian | 77.61 | 1 | 1 |
| Berber              | Japanese            | Cushitic            | 77.83 | 1 | 1 |
| Southern European   | Levantine-Caucasian | Berber              | 78.03 | 1 | 1 |
| Khoisan             | Arabian             | Northern European   | 78.19 | 1 | 1 |
| Berber              | Native American     | Chinese             | 78.44 | 1 | 1 |
| Kalash              | Arabian             | Indian              | 78.46 | 1 | 1 |
| Niger-Congo         | Siberian            | Northern European   | 78.53 | 1 | 1 |
| Cushitic            | Siberian            | Omotiic             | 79.05 | 1 | 1 |
| Nilo-Saharan        | Siberian            | Arabian             | 79.09 | 1 | 1 |
| Nilo-Saharan        | Chinese             | Pygmy               | 79.32 | 1 | 1 |
| Melanesian          | Kalash              | Northern European   | 79.39 | 1 | 1 |
| Southeast Asian     | Nilo-Saharan        | Pygmy               | 79.46 | 1 | 1 |
| Southern European   | Niger-Congo         | Pygmy               | 79.48 | 1 | 1 |
| Melanesian          | Siberian            | Indian              | 79.52 | 1 | 1 |
| Khoisan             | Siberian            | Levantine-Caucasian | 79.63 | 1 | 1 |
| Niger-Congo         | Kalash              | Southern European   | 79.82 | 1 | 1 |
| Nilo-Saharan        | Cushitic            | Niger-Congo         | 79.87 | 1 | 1 |
| Levantine-Caucasian | Native American     | Southeast Asian     | 80.10 | 1 | 1 |
| Berber              | Pygmy               | Khoisan             | 80.12 | 1 | 1 |
| Melanesian          | Berber              | Omotiic             | 80.62 | 1 | 1 |
| Japanese            | Nilo-Saharan        | Pygmy               | 80.68 | 1 | 1 |
| Melanesian          | Niger-Congo         | Southern European   | 80.71 | 1 | 1 |
| Khoisan             | Native American     | Southern European   | 80.72 | 1 | 1 |
| Pygmy               | Arabian             | Southern European   | 80.74 | 1 | 1 |
| Niger-Congo         | Arabian             | Pygmy               | 81.06 | 1 | 1 |
| Southeast Asian     | Arabian             | Cushitic            | 81.29 | 1 | 1 |
| Niger-Congo         | Northern European   | Pygmy               | 81.47 | 1 | 1 |
| Kalash              | Arabian             | Northern European   | 81.64 | 1 | 1 |
| Southeast Asian     | Northern European   | Levantine-Caucasian | 81.67 | 1 | 1 |
| Pygmy               | Arabian             | Northern European   | 81.73 | 1 | 1 |
| Arabian             | Native American     | Chinese             | 81.76 | 1 | 1 |
| Levantine-Caucasian | Pygmy               | Southern European   | 81.97 | 1 | 1 |
| Indian              | Siberian            | Kalash              | 82.03 | 1 | 1 |
| Southern European   | Native American     | Chinese             | 82.03 | 1 | 1 |
| Pygmy               | Kalash              | Southern European   | 82.31 | 1 | 1 |
| Cushitic            | Siberian            | Southern European   | 82.32 | 1 | 1 |
| Pygmy               | Chinese             | Arabian             | 82.35 | 1 | 1 |
| Berber              | Siberian            | Cushitic            | 82.67 | 1 | 1 |
| Pygmy               | Siberian            | Northern European   | 82.82 | 1 | 1 |
| Chinese             | Arabian             | Cushitic            | 82.83 | 1 | 1 |



|                     |                   |                     |       |   |   |
|---------------------|-------------------|---------------------|-------|---|---|
| Southeast Asian     | Cushitic          | Northern European   | 82.96 | 1 | 1 |
| Chinese             | Northern European | Levantine-Caucasian | 83.18 | 1 | 1 |
| Melanesian          | Kalash            | Levantine-Caucasian | 83.25 | 1 | 1 |
| Khoisan             | Kalash            | Siberian            | 83.55 | 1 | 1 |
| Levantine-Caucasian | Arabian           | Berber              | 83.63 | 1 | 1 |
| OmotiC              | Siberian          | Northern European   | 84.14 | 1 | 1 |
| Southern European   | Cushitic          | Levantine-Caucasian | 84.25 | 1 | 1 |
| Northern European   | Siberian          | Southeast Asian     | 84.25 | 1 | 1 |
| Nilo-Saharan        | Kalash            | Pygmy               | 84.31 | 1 | 1 |
| Levantine-Caucasian | Niger-Congo       | Pygmy               | 84.38 | 1 | 1 |
| Niger-Congo         | Pygmy             | Nilo-Saharan        | 84.63 | 1 | 1 |
| Southern European   | Kalash            | Indian              | 84.65 | 1 | 1 |
| Niger-Congo         | Indian            | Pygmy               | 85.07 | 1 | 1 |
| Kalash              | OmotiC            | Southern European   | 85.08 | 1 | 1 |
| Berber              | Northern European | Levantine-Caucasian | 85.57 | 1 | 1 |
| Berber              | Khoisan           | Indian              | 85.67 | 1 | 1 |
| Levantine-Caucasian | Native American   | Southern European   | 86.06 | 1 | 1 |
| OmotiC              | Arabian           | Kalash              | 86.13 | 1 | 1 |
| OmotiC              | Arabian           | Indian              | 86.27 | 1 | 1 |
| Cushitic            | Northern European | Kalash              | 86.35 | 1 | 1 |
| Indian              | Native American   | Chinese             | 86.46 | 1 | 1 |
| Niger-Congo         | Arabian           | Southern European   | 86.50 | 1 | 1 |
| Melanesian          | Kalash            | Arabian             | 86.69 | 1 | 1 |
| Melanesian          | Southern European | OmotiC              | 86.81 | 1 | 1 |
| Kalash              | Northern European | Levantine-Caucasian | 86.83 | 1 | 1 |
| Khoisan             | Cushitic          | Berber              | 86.86 | 1 | 1 |
| Kalash              | OmotiC            | Nilo-Saharan        | 86.87 | 1 | 1 |
| Khoisan             | OmotiC            | Niger-Congo         | 86.91 | 1 | 1 |
| Japanese            | Pygmy             | Arabian             | 86.98 | 1 | 1 |
| Niger-Congo         | Native American   | Southern European   | 87.51 | 1 | 1 |
| Chinese             | OmotiC            | Arabian             | 87.55 | 1 | 1 |
| Japanese            | Arabian           | Cushitic            | 87.88 | 1 | 1 |
| Indian              | OmotiC            | Nilo-Saharan        | 87.96 | 1 | 1 |
| OmotiC              | Siberian          | Levantine-Caucasian | 87.96 | 1 | 1 |
| Kalash              | Native American   | Southeast Asian     | 88.11 | 1 | 1 |
| Niger-Congo         | Siberian          | Levantine-Caucasian | 88.11 | 1 | 1 |
| Arabian             | Native American   | Cushitic            | 88.21 | 1 | 1 |
| Nilo-Saharan        | Kalash            | Southern European   | 88.32 | 1 | 1 |
| Berber              | Pygmy             | Arabian             | 88.33 | 1 | 1 |
| Pygmy               | Cushitic          | Khoisan             | 88.38 | 1 | 1 |
| Pygmy               | Siberian          | Levantine-Caucasian | 88.56 | 1 | 1 |
| Kalash              | Arabian           | Southern European   | 88.56 | 1 | 1 |
| Japanese            | Northern European | Levantine-Caucasian | 88.84 | 1 | 1 |
| Southern European   | Nilo-Saharan      | Pygmy               | 88.87 | 1 | 1 |
| Berber              | Khoisan           | Kalash              | 89.09 | 1 | 1 |
| Pygmy               | Indian            | Arabian             | 89.10 | 1 | 1 |
| OmotiC              | Northern European | Nilo-Saharan        | 89.15 | 1 | 1 |
| Khoisan             | Chinese           | Levantine-Caucasian | 89.29 | 1 | 1 |
| Southeast Asian     | Pygmy             | Arabian             | 89.66 | 1 | 1 |
| Melanesian          | Khoisan           | Native American     | 89.69 | 1 | 1 |
| Nilo-Saharan        | Siberian          | Northern European   | 89.79 | 1 | 1 |

|                     |                     |                     |       |   |   |
|---------------------|---------------------|---------------------|-------|---|---|
| Niger-Congo         | Omotoc              | Pygmy               | 89.85 | 1 | 1 |
| Melanesian          | Northern European   | Native American     | 89.87 | 1 | 1 |
| Japanese            | Omotoc              | Arabian             | 89.88 | 1 | 1 |
| Niger-Congo         | Arabian             | Northern European   | 90.15 | 1 | 1 |
| Berber              | Levantine-Caucasian | Arabian             | 90.26 | 1 | 1 |
| Northern European   | Siberian            | Berber              | 90.61 | 1 | 1 |
| Melanesian          | Northern European   | Cushitic            | 90.73 | 1 | 1 |
| Levantine-Caucasian | Niger-Congo         | Southern European   | 90.75 | 1 | 1 |
| Pygmy               | Kalash              | Siberian            | 90.78 | 1 | 1 |
| Levantine-Caucasian | Omotoc              | Northern European   | 90.81 | 1 | 1 |
| Melanesian          | Niger-Congo         | Khoisan             | 90.92 | 1 | 1 |
| Melanesian          | Arabian             | Omotoc              | 90.98 | 1 | 1 |
| Southeast Asian     | Omotoc              | Arabian             | 91.50 | 1 | 1 |
| Levantine-Caucasian | Native American     | Chinese             | 91.51 | 1 | 1 |
| Nilo-Saharan        | Northern European   | Pygmy               | 91.62 | 1 | 1 |
| Berber              | Northern European   | Arabian             | 91.96 | 1 | 1 |
| Khoisan             | Indian              | Levantine-Caucasian | 91.99 | 1 | 1 |
| Niger-Congo         | Chinese             | Arabian             | 92.31 | 1 | 1 |
| Indian              | Omotoc              | Arabian             | 92.33 | 1 | 1 |
| Cushitic            | Omotoc              | Nilo-Saharan        | 92.49 | 1 | 1 |
| Southern European   | Southeast Asian     | Cushitic            | 92.56 | 1 | 1 |
| Omotoc              | Native American     | Southern European   | 92.59 | 1 | 1 |
| Melanesian          | Pygmy               | Native American     | 92.59 | 1 | 1 |
| Southern European   | Chinese             | Cushitic            | 92.74 | 1 | 1 |
| Cushitic            | Chinese             | Southern European   | 93.10 | 1 | 1 |
| Khoisan             | Siberian            | Native American     | 93.14 | 1 | 1 |
| Melanesian          | Niger-Congo         | Native American     | 93.20 | 1 | 1 |
| Omotoc              | Native American     | Pygmy               | 93.22 | 1 | 1 |
| Southern European   | Omotoc              | Nilo-Saharan        | 93.23 | 1 | 1 |
| Melanesian          | Siberian            | Kalash              | 93.37 | 1 | 1 |
| Kalash              | Siberian            | Northern European   | 93.45 | 1 | 1 |
| Melanesian          | Levantine-Caucasian | Omotoc              | 94.00 | 1 | 1 |
| Southeast Asian     | Northern European   | Arabian             | 94.14 | 1 | 1 |
| Chinese             | Northern European   | Arabian             | 94.33 | 1 | 1 |
| Levantine-Caucasian | Omotoc              | Nilo-Saharan        | 94.45 | 1 | 1 |
| Levantine-Caucasian | Siberian            | Southern European   | 94.71 | 1 | 1 |
| Chinese             | Indian              | Kalash              | 94.79 | 1 | 1 |
| Nilo-Saharan        | Arabian             | Southern European   | 94.86 | 1 | 1 |
| Melanesian          | Nilo-Saharan        | Southern European   | 94.89 | 1 | 1 |
| Melanesian          | Omotoc              | Niger-Congo         | 94.99 | 1 | 1 |
| Melanesian          | Southern European   | Native American     | 95.00 | 1 | 1 |
| Nilo-Saharan        | Arabian             | Pygmy               | 95.05 | 1 | 1 |
| Pygmy               | Native American     | Southern European   | 95.27 | 1 | 1 |
| Nilo-Saharan        | Siberian            | Levantine-Caucasian | 95.39 | 1 | 1 |
| Japanese            | Indian              | Kalash              | 95.47 | 1 | 1 |
| Melanesian          | Omotoc              | Southern European   | 95.54 | 1 | 1 |
| Niger-Congo         | Japanese            | Arabian             | 95.60 | 1 | 1 |
| Levantine-Caucasian | Chinese             | Southern European   | 95.61 | 1 | 1 |
| Japanese            | Cushitic            | Southern European   | 95.63 | 1 | 1 |
| Khoisan             | Japanese            | Levantine-Caucasian | 95.66 | 1 | 1 |
| Southeast Asian     | Levantine-Caucasian | Southern European   | 95.69 | 1 | 1 |

|                     |                     |                     |        |   |   |
|---------------------|---------------------|---------------------|--------|---|---|
| Kalash              | Northern European   | Indian              | 95.89  | 1 | 1 |
| Native American     | Northern European   | Berber              | 96.11  | 1 | 1 |
| Levantine-Caucasian | Nilo-Saharan        | Pygmy               | 96.44  | 1 | 1 |
| Melanesian          | Khoisan             | Southern European   | 96.53  | 1 | 1 |
| Khoisan             | Chinese             | Northern European   | 96.68  | 1 | 1 |
| Arabian             | Siberian            | Cushitic            | 96.79  | 1 | 1 |
| Southeast Asian     | Khoisan             | Levantine-Caucasian | 97.04  | 1 | 1 |
| Southeast Asian     | Indian              | Kalash              | 97.06  | 1 | 1 |
| Pygmy               | Cushitic            | Berber              | 97.19  | 1 | 1 |
| Pygmy               | Siberian            | Native American     | 97.23  | 1 | 1 |
| Berber              | Omotic              | Arabian             | 97.26  | 1 | 1 |
| Indian              | Arabian             | Northern European   | 97.51  | 1 | 1 |
| Kalash              | Native American     | Chinese             | 97.66  | 1 | 1 |
| Melanesian          | Southeast Asian     | Indian              | 97.68  | 1 | 1 |
| Indian              | Northern European   | Levantine-Caucasian | 97.71  | 1 | 1 |
| Pygmy               | Omotic              | Khoisan             | 97.75  | 1 | 1 |
| Melanesian          | Chinese             | Indian              | 97.91  | 1 | 1 |
| Nilo-Saharan        | Chinese             | Arabian             | 97.93  | 1 | 1 |
| Southern European   | Japanese            | Cushitic            | 97.96  | 1 | 1 |
| Southeast Asian     | Cushitic            | Southern European   | 98.00  | 1 | 1 |
| Berber              | Pygmy               | Indian              | 98.09  | 1 | 1 |
| Nilo-Saharan        | Indian              | Pygmy               | 98.09  | 1 | 1 |
| Berber              | Omotic              | Nilo-Saharan        | 98.18  | 1 | 1 |
| Melanesian          | Nilo-Saharan        | Native American     | 98.52  | 1 | 1 |
| Southeast Asian     | Niger-Congo         | Arabian             | 98.56  | 1 | 1 |
| Native American     | Siberian            | Southeast Asian     | 98.92  | 1 | 1 |
| Levantine-Caucasian | Japanese            | Southern European   | 98.98  | 1 | 1 |
| Levantine-Caucasian | Omotic              | Southern European   | 99.02  | 1 | 1 |
| Khoisan             | Japanese            | Northern European   | 99.11  | 1 | 1 |
| Berber              | Pygmy               | Kalash              | 99.20  | 1 | 1 |
| Melanesian          | Japanese            | Indian              | 99.32  | 1 | 1 |
| Khoisan             | Northern European   | Siberian            | 99.46  | 1 | 1 |
| Khoisan             | Kalash              | Japanese            | 99.58  | 1 | 1 |
| Nilo-Saharan        | Arabian             | Northern European   | 99.73  | 1 | 1 |
| Pygmy               | Indian              | Levantine-Caucasian | 99.97  | 1 | 1 |
| Nilo-Saharan        | Native American     | Southern European   | 99.99  | 1 | 1 |
| Levantine-Caucasian | Nilo-Saharan        | Southern European   | 100.02 | 1 | 1 |
| Southern European   | Native American     | Cushitic            | 100.02 | 1 | 1 |
| Japanese            | Nilo-Saharan        | Arabian             | 100.09 | 1 | 1 |
| Omotic              | Arabian             | Nilo-Saharan        | 100.18 | 1 | 1 |
| Melanesian          | Pygmy               | Southern European   | 100.55 | 1 | 1 |
| Melanesian          | Levantine-Caucasian | Native American     | 101.05 | 1 | 1 |
| Indian              | Omotic              | Levantine-Caucasian | 101.07 | 1 | 1 |
| Chinese             | Kalash              | Northern European   | 101.15 | 1 | 1 |
| Japanese            | Northern European   | Arabian             | 101.22 | 1 | 1 |
| Omotic              | Arabian             | Southern European   | 101.38 | 1 | 1 |
| Southeast Asian     | Kalash              | Northern European   | 101.76 | 1 | 1 |
| Southeast Asian     | Nilo-Saharan        | Arabian             | 102.19 | 1 | 1 |
| Cushitic            | Northern European   | Indian              | 102.22 | 1 | 1 |
| Southeast Asian     | Khoisan             | Northern European   | 102.34 | 1 | 1 |
| Levantine-Caucasian | Kalash              | Indian              | 102.35 | 1 | 1 |

|                     |                     |                     |        |   |   |
|---------------------|---------------------|---------------------|--------|---|---|
| Southeast Asian     | Japanese            | Siberian            | 102.65 | 1 | 1 |
| Melanesian          | Omotoc              | Native American     | 102.76 | 1 | 1 |
| Berber              | Khoisan             | Levantine-Caucasian | 103.06 | 1 | 1 |
| Berber              | Cushitic            | Arabian             | 103.39 | 1 | 1 |
| Melanesian          | Cushitic            | Native American     | 103.47 | 1 | 1 |
| Kalash              | Native American     | Levantine-Caucasian | 103.49 | 1 | 1 |
| Pygmy               | Chinese             | Levantine-Caucasian | 103.64 | 1 | 1 |
| Melanesian          | Kalash              | Native American     | 103.69 | 1 | 1 |
| Cushitic            | Omotoc              | Berber              | 103.81 | 1 | 1 |
| Japanese            | Kalash              | Northern European   | 103.88 | 1 | 1 |
| Melanesian          | Siberian            | Native American     | 104.01 | 1 | 1 |
| Melanesian          | Arabian             | Native American     | 104.01 | 1 | 1 |
| Northern European   | Siberian            | Levantine-Caucasian | 104.25 | 1 | 1 |
| Nilo-Saharan        | Indian              | Arabian             | 104.29 | 1 | 1 |
| Omotoc              | Siberian            | Pygmy               | 104.30 | 1 | 1 |
| Niger-Congo         | Indian              | Arabian             | 104.33 | 1 | 1 |
| Japanese            | Pygmy               | Levantine-Caucasian | 104.43 | 1 | 1 |
| Pygmy               | Kalash              | Japanese            | 104.52 | 1 | 1 |
| Niger-Congo         | Kalash              | Siberian            | 104.75 | 1 | 1 |
| Khoisan             | Indian              | Siberian            | 104.81 | 1 | 1 |
| Southern European   | Levantine-Caucasian | Arabian             | 104.98 | 1 | 1 |
| Niger-Congo         | Pygmy               | Omotoc              | 105.04 | 1 | 1 |
| Levantine-Caucasian | Kalash              | Northern European   | 105.09 | 1 | 1 |
| Khoisan             | Indian              | Northern European   | 105.25 | 1 | 1 |
| Japanese            | Omotoc              | Levantine-Caucasian | 105.64 | 1 | 1 |
| Khoisan             | Kalash              | Southeast Asian     | 105.67 | 1 | 1 |
| Southeast Asian     | Levantine-Caucasian | Cushitic            | 105.98 | 1 | 1 |
| Kalash              | Native American     | Berber              | 106.00 | 1 | 1 |
| Levantine-Caucasian | Indian              | Northern European   | 106.22 | 1 | 1 |
| Southeast Asian     | Omotoc              | Pygmy               | 106.30 | 1 | 1 |
| Southeast Asian     | Pygmy               | Levantine-Caucasian | 106.34 | 1 | 1 |
| Chinese             | Omotoc              | Levantine-Caucasian | 106.48 | 1 | 1 |
| Levantine-Caucasian | Indian              | Berber              | 106.64 | 1 | 1 |
| Southeast Asian     | Kalash              | Berber              | 106.65 | 1 | 1 |
| Nilo-Saharan        | Omotoc              | Niger-Congo         | 106.74 | 1 | 1 |
| Melanesian          | Northern European   | Omotoc              | 106.89 | 1 | 1 |
| Berber              | Levantine-Caucasian | Southern European   | 106.97 | 1 | 1 |
| Chinese             | Omotoc              | Pygmy               | 106.99 | 1 | 1 |
| Cushitic            | Indian              | Northern European   | 107.06 | 1 | 1 |
| Japanese            | Pygmy               | Northern European   | 107.08 | 1 | 1 |
| Indian              | Arabian             | Southern European   | 107.11 | 1 | 1 |
| Japanese            | Omotoc              | Pygmy               | 107.27 | 1 | 1 |
| Nilo-Saharan        | Kalash              | Siberian            | 107.31 | 1 | 1 |
| Melanesian          | Berber              | Native American     | 107.32 | 1 | 1 |
| Khoisan             | Japanese            | Native American     | 107.35 | 1 | 1 |
| Levantine-Caucasian | Chinese             | Cushitic            | 107.38 | 1 | 1 |
| Southeast Asian     | Omotoc              | Levantine-Caucasian | 107.44 | 1 | 1 |
| Pygmy               | Northern European   | Siberian            | 107.45 | 1 | 1 |
| Chinese             | Kalash              | Berber              | 107.52 | 1 | 1 |
| Berber              | Indian              | Cushitic            | 107.60 | 1 | 1 |
| Berber              | Niger-Congo         | Pygmy               | 107.69 | 1 | 1 |

|                     |                   |                     |        |   |   |
|---------------------|-------------------|---------------------|--------|---|---|
| Southern European   | Berber            | Arabian             | 108.11 | 1 | 1 |
| Chinese             | Siberian          | Southeast Asian     | 108.19 | 1 | 1 |
| Japanese            | Omotc             | Northern European   | 108.68 | 1 | 1 |
| Omotc               | Native American   | Niger-Congo         | 108.70 | 1 | 1 |
| Southern European   | Khoisan           | Siberian            | 108.93 | 1 | 1 |
| Southern European   | Northern European | Berber              | 109.27 | 1 | 1 |
| Berber              | Nilo-Saharan      | Arabian             | 109.28 | 1 | 1 |
| Melanesian          | Nilo-Saharan      | Khoisan             | 109.30 | 1 | 1 |
| Southern European   | Siberian          | Cushitic            | 109.32 | 1 | 1 |
| Pygmy               | Kalash            | Southeast Asian     | 109.34 | 1 | 1 |
| Native American     | Northern European | Southeast Asian     | 109.46 | 1 | 1 |
| Niger-Congo         | Cushitic          | Berber              | 109.60 | 1 | 1 |
| Southeast Asian     | Pygmy             | Northern European   | 109.60 | 1 | 1 |
| Pygmy               | Chinese           | Northern European   | 109.62 | 1 | 1 |
| Native American     | Northern European | Levantine-Caucasian | 109.99 | 1 | 1 |
| Cushitic            | Indian            | Omotc               | 110.01 | 1 | 1 |
| Berber              | Nilo-Saharan      | Pygmy               | 110.17 | 1 | 1 |
| Southeast Asian     | Kalash            | Levantine-Caucasian | 110.30 | 1 | 1 |
| Japanese            | Kalash            | Berber              | 110.33 | 1 | 1 |
| Cushitic            | Indian            | Southern European   | 110.64 | 1 | 1 |
| Kalash              | Siberian          | Levantine-Caucasian | 110.70 | 1 | 1 |
| Japanese            | Pygmy             | Native American     | 110.72 | 1 | 1 |
| Cushitic            | Kalash            | Omotc               | 110.75 | 1 | 1 |
| Melanesian          | Indian            | Berber              | 110.97 | 1 | 1 |
| Levantine-Caucasian | Japanese          | Cushitic            | 111.23 | 1 | 1 |
| Chinese             | Omotc             | Northern European   | 111.37 | 1 | 1 |
| Omotc               | Arabian           | Northern European   | 111.49 | 1 | 1 |
| Melanesian          | Southeast Asian   | Kalash              | 111.60 | 1 | 1 |
| Chinese             | Kalash            | Levantine-Caucasian | 111.67 | 1 | 1 |
| Kalash              | Siberian          | Berber              | 111.95 | 1 | 1 |
| Berber              | Native American   | Omotc               | 111.98 | 1 | 1 |
| Khoisan             | Siberian          | Southern European   | 112.02 | 1 | 1 |
| Berber              | Pygmy             | Levantine-Caucasian | 112.39 | 1 | 1 |
| Arabian             | Northern European | Kalash              | 112.52 | 1 | 1 |
| Niger-Congo         | Cushitic          | Pygmy               | 112.66 | 1 | 1 |
| Indian              | Northern European | Berber              | 112.92 | 1 | 1 |
| Japanese            | Kalash            | Levantine-Caucasian | 112.99 | 1 | 1 |
| Melanesian          | Japanese          | Kalash              | 112.99 | 1 | 1 |
| Pygmy               | Indian            | Siberian            | 113.15 | 1 | 1 |
| Melanesian          | Cushitic          | Nilo-Saharan        | 113.19 | 1 | 1 |
| Berber              | Arabian           | Southern European   | 113.23 | 1 | 1 |
| Berber              | Kalash            | Cushitic            | 113.28 | 1 | 1 |
| Southeast Asian     | Omotc             | Northern European   | 113.37 | 1 | 1 |
| Niger-Congo         | Indian            | Levantine-Caucasian | 113.65 | 1 | 1 |
| Levantine-Caucasian | Indian            | Arabian             | 113.66 | 1 | 1 |
| Omotc               | Siberian          | Native American     | 113.71 | 1 | 1 |
| Melanesian          | Chinese           | Kalash              | 113.71 | 1 | 1 |
| Nilo-Saharan        | Siberian          | Native American     | 113.90 | 1 | 1 |
| Northern European   | Siberian          | Arabian             | 113.91 | 1 | 1 |
| Levantine-Caucasian | Cushitic          | Southern European   | 113.91 | 1 | 1 |
| Niger-Congo         | Siberian          | Native American     | 113.94 | 1 | 1 |

|                     |                     |                     |        |   |   |
|---------------------|---------------------|---------------------|--------|---|---|
| Melanesian          | Kalash              | Southern European   | 114.00 | 1 | 1 |
| Kalash              | Native American     | Arabian             | 114.44 | 1 | 1 |
| Southeast Asian     | Berber              | Omotc               | 114.49 | 1 | 1 |
| Pygmy               | Indian              | Northern European   | 114.56 | 1 | 1 |
| Southeast Asian     | Niger-Congo         | Levantine-Caucasian | 114.71 | 1 | 1 |
| Niger-Congo         | Japanese            | Levantine-Caucasian | 114.92 | 1 | 1 |
| Niger-Congo         | Japanese            | Northern European   | 114.95 | 1 | 1 |
| Niger-Congo         | Chinese             | Levantine-Caucasian | 114.98 | 1 | 1 |
| Nilo-Saharan        | Indian              | Levantine-Caucasian | 115.02 | 1 | 1 |
| Southern European   | Pygmy               | Siberian            | 115.19 | 1 | 1 |
| Southeast Asian     | Northern European   | Southern European   | 115.21 | 1 | 1 |
| Khoisan             | Native American     | Melanesian          | 115.37 | 1 | 1 |
| Kalash              | Omotc               | Pygmy               | 115.51 | 1 | 1 |
| Levantine-Caucasian | Cushitic            | Kalash              | 115.63 | 1 | 1 |
| Khoisan             | Chinese             | Native American     | 115.68 | 1 | 1 |
| Levantine-Caucasian | Native American     | Cushitic            | 115.96 | 1 | 1 |
| Nilo-Saharan        | Omotc               | Pygmy               | 116.14 | 1 | 1 |
| Southern European   | Levantine-Caucasian | Northern European   | 116.31 | 1 | 1 |
| Indian              | Native American     | Northern European   | 116.74 | 1 | 1 |
| Kalash              | Omotc               | Siberian            | 116.99 | 1 | 1 |
| Southeast Asian     | Native American     | Indian              | 117.61 | 1 | 1 |
| Berber              | Chinese             | Omotc               | 117.62 | 1 | 1 |
| Omotc               | Siberian            | Southern European   | 117.69 | 1 | 1 |
| Levantine-Caucasian | Northern European   | Berber              | 118.21 | 1 | 1 |
| Melanesian          | Kalash              | Cushitic            | 118.27 | 1 | 1 |
| Khoisan             | Indian              | Japanese            | 118.36 | 1 | 1 |
| Levantine-Caucasian | Kalash              | Berber              | 118.36 | 1 | 1 |
| Southeast Asian     | Niger-Congo         | Northern European   | 118.66 | 1 | 1 |
| Pygmy               | Native American     | Melanesian          | 118.76 | 1 | 1 |
| Southeast Asian     | Kalash              | Arabian             | 118.79 | 1 | 1 |
| Berber              | Niger-Congo         | Arabian             | 118.79 | 1 | 1 |
| Chinese             | Northern European   | Southern European   | 118.83 | 1 | 1 |
| Pygmy               | Siberian            | Southern European   | 118.84 | 1 | 1 |
| Levantine-Caucasian | Kalash              | Arabian             | 118.87 | 1 | 1 |
| Kalash              | Northern European   | Berber              | 118.94 | 1 | 1 |
| Omotc               | Siberian            | Niger-Congo         | 119.00 | 1 | 1 |
| Niger-Congo         | Chinese             | Northern European   | 119.09 | 1 | 1 |
| Pygmy               | Chinese             | Native American     | 119.22 | 1 | 1 |
| Melanesian          | Native American     | Berber              | 119.32 | 1 | 1 |
| Chinese             | Kalash              | Arabian             | 119.40 | 1 | 1 |
| Japanese            | Nilo-Saharan        | Levantine-Caucasian | 119.43 | 1 | 1 |
| Kalash              | Siberian            | Arabian             | 119.70 | 1 | 1 |
| Native American     | Northern European   | Arabian             | 119.71 | 1 | 1 |
| Berber              | Khoisan             | Southern European   | 119.77 | 1 | 1 |
| Southeast Asian     | Khoisan             | Native American     | 119.93 | 1 | 1 |
| Nilo-Saharan        | Cushitic            | Berber              | 119.94 | 1 | 1 |
| Niger-Congo         | Kalash              | Japanese            | 119.97 | 1 | 1 |
| Chinese             | Omotc               | Niger-Congo         | 120.10 | 1 | 1 |
| Southeast Asian     | Omotc               | Niger-Congo         | 120.22 | 1 | 1 |
| Berber              | Japanese            | Omotc               | 120.32 | 1 | 1 |
| Levantine-Caucasian | Siberian            | Cushitic            | 120.34 | 1 | 1 |

|                     |                   |                     |        |   |   |
|---------------------|-------------------|---------------------|--------|---|---|
| Southeast Asian     | Nilo-Saharan      | Levantine-Caucasian | 120.50 | 1 | 1 |
| Indian              | OmotiC            | Northern European   | 121.03 | 1 | 1 |
| Southern European   | Cushitic          | Northern European   | 121.62 | 1 | 1 |
| Melanesian          | Kalash            | OmotiC              | 121.98 | 1 | 1 |
| Japanese            | Northern European | Southern European   | 122.00 | 1 | 1 |
| Japanese            | Kalash            | Arabian             | 122.13 | 1 | 1 |
| Japanese            | OmotiC            | Niger-Congo         | 122.14 | 1 | 1 |
| Levantine-Caucasian | Khoisan           | Siberian            | 122.17 | 1 | 1 |
| Japanese            | Siberian          | Southeast Asian     | 122.21 | 1 | 1 |
| Nilo-Saharan        | Chinese           | Levantine-Caucasian | 122.29 | 1 | 1 |
| Nilo-Saharan        | Cushitic          | Pygmy               | 122.44 | 1 | 1 |
| Southeast Asian     | Pygmy             | Native American     | 122.46 | 1 | 1 |
| Kalash              | Siberian          | Native American     | 122.54 | 1 | 1 |
| Japanese            | Northern European | Native American     | 122.65 | 1 | 1 |
| Berber              | OmotiC            | Levantine-Caucasian | 122.71 | 1 | 1 |
| Japanese            | Nilo-Saharan      | Northern European   | 122.80 | 1 | 1 |
| Nilo-Saharan        | Kalash            | Japanese            | 123.15 | 1 | 1 |
| Cushitic            | Siberian          | Native American     | 123.69 | 1 | 1 |
| Berber              | Khoisan           | Northern European   | 123.94 | 1 | 1 |
| Khoisan             | Indian            | Southeast Asian     | 124.09 | 1 | 1 |
| Melanesian          | OmotiC            | Khoisan             | 124.41 | 1 | 1 |
| Berber              | OmotiC            | Kalash              | 124.44 | 1 | 1 |
| Berber              | Siberian          | OmotiC              | 124.54 | 1 | 1 |
| Northern European   | Siberian          | Native American     | 124.81 | 1 | 1 |
| Indian              | OmotiC            | Pygmy               | 124.94 | 1 | 1 |
| Southern European   | Cushitic          | Kalash              | 125.03 | 1 | 1 |
| Native American     | Northern European | Chinese             | 125.32 | 1 | 1 |
| Khoisan             | Northern European | Japanese            | 125.48 | 1 | 1 |
| Berber              | Siberian          | Native American     | 125.74 | 1 | 1 |
| Melanesian          | Indian            | Native American     | 125.76 | 1 | 1 |
| Melanesian          | Cushitic          | Pygmy               | 125.83 | 1 | 1 |
| Japanese            | Kalash            | Native American     | 126.10 | 1 | 1 |
| Khoisan             | Pygmy             | OmotiC              | 126.21 | 1 | 1 |
| Pygmy               | Indian            | Japanese            | 126.38 | 1 | 1 |
| Southeast Asian     | Nilo-Saharan      | Northern European   | 126.42 | 1 | 1 |
| Niger-Congo         | Siberian          | Southern European   | 126.65 | 1 | 1 |
| Southern European   | Siberian          | Native American     | 126.67 | 1 | 1 |
| Berber              | Northern European | Kalash              | 126.87 | 1 | 1 |
| Southeast Asian     | Native American   | Kalash              | 126.90 | 1 | 1 |
| Melanesian          | Indian            | Arabian             | 127.10 | 1 | 1 |
| Khoisan             | Arabian           | Siberian            | 127.30 | 1 | 1 |
| OmotiC              | Northern European | Pygmy               | 127.67 | 1 | 1 |
| Nilo-Saharan        | Chinese           | Northern European   | 127.71 | 1 | 1 |
| Niger-Congo         | Kalash            | Southeast Asian     | 127.84 | 1 | 1 |
| Berber              | Arabian           | Levantine-Caucasian | 127.86 | 1 | 1 |
| Arabian             | Siberian          | Native American     | 128.08 | 1 | 1 |
| Kalash              | Northern European | Arabian             | 128.26 | 1 | 1 |
| Nilo-Saharan        | Kalash            | Southeast Asian     | 128.36 | 1 | 1 |
| Berber              | Nilo-Saharan      | Indian              | 128.74 | 1 | 1 |
| Cushitic            | Arabian           | Levantine-Caucasian | 128.75 | 1 | 1 |
| Levantine-Caucasian | Arabian           | Southern European   | 128.81 | 1 | 1 |

|                     |                     |                     |        |   |   |
|---------------------|---------------------|---------------------|--------|---|---|
| Levantine-Caucasian | Pygmy               | Siberian            | 128.89 | 1 | 1 |
| Berber              | OmotiC              | Indian              | 129.09 | 1 | 1 |
| Levantine-Caucasian | Siberian            | Native American     | 129.17 | 1 | 1 |
| Berber              | Nilo-Saharan        | Kalash              | 129.36 | 1 | 1 |
| Levantine-Caucasian | Northern European   | Kalash              | 129.67 | 1 | 1 |
| Melanesian          | Japanese            | Native American     | 129.70 | 1 | 1 |
| Khoisan             | Siberian            | Melanesian          | 129.86 | 1 | 1 |
| Pygmy               | Northern European   | Japanese            | 129.93 | 1 | 1 |
| Japanese            | OmotiC              | Native American     | 130.08 | 1 | 1 |
| Pygmy               | Nilo-Saharan        | Khoisan             | 130.15 | 1 | 1 |
| Pygmy               | Siberian            | Melanesian          | 130.15 | 1 | 1 |
| Northern European   | Siberian            | Southern European   | 130.29 | 1 | 1 |
| Indian              | Northern European   | Arabian             | 130.37 | 1 | 1 |
| Southeast Asian     | Chinese             | Siberian            | 130.37 | 1 | 1 |
| Pygmy               | Indian              | Southeast Asian     | 130.49 | 1 | 1 |
| Pygmy               | Arabian             | Siberian            | 130.60 | 1 | 1 |
| Berber              | Pygmy               | Southern European   | 130.61 | 1 | 1 |
| Arabian             | Native American     | OmotiC              | 130.82 | 1 | 1 |
| Kalash              | Northern European   | Southern European   | 130.95 | 1 | 1 |
| Kalash              | OmotiC              | Japanese            | 131.04 | 1 | 1 |
| Southern European   | Japanese            | Native American     | 131.19 | 1 | 1 |
| Berber              | Pygmy               | Northern European   | 131.50 | 1 | 1 |
| Melanesian          | Indian              | Northern European   | 131.73 | 1 | 1 |
| Southern European   | OmotiC              | Pygmy               | 131.78 | 1 | 1 |
| Kalash              | OmotiC              | Niger-Congo         | 132.12 | 1 | 1 |
| Chinese             | Kalash              | Native American     | 132.42 | 1 | 1 |
| Nilo-Saharan        | Siberian            | Southern European   | 133.72 | 1 | 1 |
| Chinese             | Northern European   | Native American     | 133.74 | 1 | 1 |
| Japanese            | Arabian             | Native American     | 134.08 | 1 | 1 |
| Southeast Asian     | Arabian             | OmotiC              | 134.12 | 1 | 1 |
| Levantine-Caucasian | OmotiC              | Pygmy               | 134.19 | 1 | 1 |
| Southern European   | Khoisan             | Japanese            | 134.44 | 1 | 1 |
| Berber              | Japanese            | Native American     | 134.54 | 1 | 1 |
| Levantine-Caucasian | Arabian             | Kalash              | 134.58 | 1 | 1 |
| Indian              | Native American     | Berber              | 134.76 | 1 | 1 |
| Niger-Congo         | Indian              | Northern European   | 134.99 | 1 | 1 |
| Japanese            | Nilo-Saharan        | Native American     | 135.02 | 1 | 1 |
| OmotiC              | Arabian             | Pygmy               | 135.18 | 1 | 1 |
| Southern European   | Pygmy               | Japanese            | 135.21 | 1 | 1 |
| Berber              | Levantine-Caucasian | Northern European   | 135.31 | 1 | 1 |
| Niger-Congo         | Nilo-Saharan        | OmotiC              | 135.35 | 1 | 1 |
| Khoisan             | Northern European   | Southeast Asian     | 135.40 | 1 | 1 |
| Southeast Asian     | Pygmy               | Melanesian          | 135.41 | 1 | 1 |
| Nilo-Saharan        | Indian              | Northern European   | 135.67 | 1 | 1 |
| Southeast Asian     | Kalash              | Native American     | 135.69 | 1 | 1 |
| Niger-Congo         | Japanese            | Native American     | 135.71 | 1 | 1 |
| Southern European   | Arabian             | Levantine-Caucasian | 135.92 | 1 | 1 |
| Berber              | Niger-Congo         | Kalash              | 135.98 | 1 | 1 |
| Berber              | Niger-Congo         | Indian              | 136.04 | 1 | 1 |
| Japanese            | Cushitic            | Native American     | 136.07 | 1 | 1 |
| Melanesian          | Southeast Asian     | Native American     | 136.19 | 1 | 1 |



|                     |                     |                     |        |   |   |
|---------------------|---------------------|---------------------|--------|---|---|
| Southeast Asian     | Khoisan             | Melanesian          | 136.21 | 1 | 1 |
| Cushitic            | Northern European   | Omotc               | 136.52 | 1 | 1 |
| Khoisan             | Japanese            | Southern European   | 136.72 | 1 | 1 |
| Melanesian          | Chinese             | Native American     | 136.96 | 1 | 1 |
| Indian              | Arabian             | Cushitic            | 136.97 | 1 | 1 |
| Cushitic            | Omotc               | Pygmy               | 136.98 | 1 | 1 |
| Pygmy               | Northern European   | Southeast Asian     | 137.13 | 1 | 1 |
| Japanese            | Pygmy               | Melanesian          | 137.21 | 1 | 1 |
| Southeast Asian     | Northern European   | Native American     | 137.25 | 1 | 1 |
| Kalash              | Omotc               | Southeast Asian     | 137.29 | 1 | 1 |
| Indian              | Kalash              | Levantine-Caucasian | 137.47 | 1 | 1 |
| Berber              | Omotc               | Pygmy               | 137.55 | 1 | 1 |
| Levantine-Caucasian | Japanese            | Native American     | 137.57 | 1 | 1 |
| Southeast Asian     | Khoisan             | Southern European   | 137.58 | 1 | 1 |
| Berber              | Levantine-Caucasian | Kalash              | 137.61 | 1 | 1 |
| Indian              | Omotc               | Niger-Congo         | 137.70 | 1 | 1 |
| Melanesian          | Native American     | Northern European   | 137.75 | 1 | 1 |
| Levantine-Caucasian | Cushitic            | Northern European   | 137.89 | 1 | 1 |
| Chinese             | Arabian             | Omotc               | 137.99 | 1 | 1 |
| Japanese            | Chinese             | Siberian            | 138.09 | 1 | 1 |
| Khoisan             | Chinese             | Southern European   | 138.22 | 1 | 1 |
| Berber              | Arabian             | Cushitic            | 138.35 | 1 | 1 |
| Melanesian          | Indian              | Levantine-Caucasian | 138.63 | 1 | 1 |
| Berber              | Nilo-Saharan        | Levantine-Caucasian | 138.76 | 1 | 1 |
| Khoisan             | Japanese            | Melanesian          | 138.86 | 1 | 1 |
| Khoisan             | Indian              | Southern European   | 138.88 | 1 | 1 |
| Berber              | Omotc               | Southern European   | 138.88 | 1 | 1 |
| Japanese            | Arabian             | Omotc               | 139.58 | 1 | 1 |
| Nilo-Saharan        | Northern European   | Siberian            | 139.69 | 1 | 1 |
| Indian              | Omotc               | Siberian            | 139.95 | 1 | 1 |
| Chinese             | Omotc               | Native American     | 140.09 | 1 | 1 |
| Pygmy               | Kalash              | Chinese             | 140.10 | 1 | 1 |
| Berber              | Omotc               | Niger-Congo         | 140.28 | 1 | 1 |
| Japanese            | Omotc               | Southern European   | 140.49 | 1 | 1 |
| Southern European   | Levantine-Caucasian | Kalash              | 140.85 | 1 | 1 |
| Southeast Asian     | Omotc               | Native American     | 140.96 | 1 | 1 |
| Omotc               | Native American     | Melanesian          | 141.03 | 1 | 1 |
| Southern European   | Pygmy               | Southeast Asian     | 141.20 | 1 | 1 |
| Southeast Asian     | Omotc               | Southern European   | 141.31 | 1 | 1 |
| Nilo-Saharan        | Indian              | Siberian            | 141.44 | 1 | 1 |
| Levantine-Caucasian | Cushitic            | Indian              | 141.72 | 1 | 1 |
| Southern European   | Khoisan             | Southeast Asian     | 141.72 | 1 | 1 |
| Omotc               | Northern European   | Niger-Congo         | 141.77 | 1 | 1 |
| Melanesian          | Native American     | Omotc               | 141.91 | 1 | 1 |
| Cushitic            | Omotc               | Niger-Congo         | 141.95 | 1 | 1 |
| Southern European   | Southeast Asian     | Omotc               | 141.98 | 1 | 1 |
| Cushitic            | Arabian             | Southern European   | 142.05 | 1 | 1 |
| Melanesian          | Native American     | Arabian             | 142.12 | 1 | 1 |
| Southern European   | Native American     | Omotc               | 142.13 | 1 | 1 |
| Japanese            | Pygmy               | Southern European   | 142.14 | 1 | 1 |
| Khoisan             | Kalash              | Chinese             | 142.59 | 1 | 1 |

|                     |                     |                     |        |   |   |
|---------------------|---------------------|---------------------|--------|---|---|
| Indian              | Northern European   | Southern European   | 142.67 | 1 | 1 |
| Niger-Congo         | Indian              | Siberian            | 142.70 | 1 | 1 |
| Southeast Asian     | Pygmy               | Southern European   | 142.88 | 1 | 1 |
| Southeast Asian     | Northern European   | Cushitic            | 142.92 | 1 | 1 |
| Southern European   | Chinese             | Native American     | 143.28 | 1 | 1 |
| Kalash              | Native American     | Southern European   | 143.37 | 1 | 1 |
| Niger-Congo         | Native American     | Khoisan             | 143.74 | 1 | 1 |
| Levantine-Caucasian | Northern European   | Southern European   | 143.81 | 1 | 1 |
| Pygmy               | Indian              | Southern European   | 143.83 | 1 | 1 |
| Niger-Congo         | Northern European   | Siberian            | 143.90 | 1 | 1 |
| Niger-Congo         | Pygmy               | Khoisan             | 144.00 | 1 | 1 |
| Kalash              | Arabian             | Cushitic            | 144.09 | 1 | 1 |
| Native American     | Northern European   | Southern European   | 144.22 | 1 | 1 |
| Berber              | Chinese             | Native American     | 144.40 | 1 | 1 |
| Southern European   | Berber              | Levantine-Caucasian | 144.85 | 1 | 1 |
| Chinese             | Arabian             | Native American     | 144.94 | 1 | 1 |
| Melanesian          | Indian              | OmotiC              | 145.21 | 1 | 1 |
| Indian              | OmotiC              | Southern European   | 145.39 | 1 | 1 |
| Arabian             | Siberian            | OmotiC              | 145.47 | 1 | 1 |
| Levantine-Caucasian | Khoisan             | Japanese            | 146.06 | 1 | 1 |
| Southern European   | Northern European   | Levantine-Caucasian | 146.08 | 1 | 1 |
| Chinese             | OmotiC              | Southern European   | 146.15 | 1 | 1 |
| Levantine-Caucasian | Northern European   | Arabian             | 146.22 | 1 | 1 |
| Cushitic            | Arabian             | Kalash              | 146.52 | 1 | 1 |
| Indian              | Kalash              | Northern European   | 146.75 | 1 | 1 |
| Southern European   | Southeast Asian     | Native American     | 146.76 | 1 | 1 |
| Southeast Asian     | Berber              | Native American     | 146.78 | 1 | 1 |
| Southern European   | OmotiC              | Niger-Congo         | 146.93 | 1 | 1 |
| Southeast Asian     | Levantine-Caucasian | OmotiC              | 147.51 | 1 | 1 |
| Southeast Asian     | Nilo-Saharan        | Native American     | 147.51 | 1 | 1 |
| Niger-Congo         | Nilo-Saharan        | Pygmy               | 147.55 | 1 | 1 |
| Cushitic            | Native American     | Nilo-Saharan        | 147.60 | 1 | 1 |
| Native American     | Siberian            | Kalash              | 147.60 | 1 | 1 |
| Pygmy               | Chinese             | Southern European   | 147.69 | 1 | 1 |
| Southeast Asian     | Arabian             | Native American     | 147.89 | 1 | 1 |
| Indian              | Siberian            | Native American     | 147.90 | 1 | 1 |
| Nilo-Saharan        | Chinese             | Native American     | 147.98 | 1 | 1 |
| Southern European   | Cushitic            | Indian              | 148.05 | 1 | 1 |
| Melanesian          | Indian              | Cushitic            | 148.18 | 1 | 1 |
| Cushitic            | Chinese             | Native American     | 148.49 | 1 | 1 |
| OmotiC              | Northern European   | Siberian            | 148.90 | 1 | 1 |
| Levantine-Caucasian | Native American     | OmotiC              | 148.93 | 1 | 1 |
| Melanesian          | Siberian            | Berber              | 148.98 | 1 | 1 |
| Berber              | Niger-Congo         | Levantine-Caucasian | 149.05 | 1 | 1 |
| Levantine-Caucasian | Kalash              | Southern European   | 149.21 | 1 | 1 |
| Southern European   | Japanese            | OmotiC              | 149.27 | 1 | 1 |
| Kalash              | Siberian            | Southern European   | 149.47 | 1 | 1 |
| Japanese            | Chinese             | Southeast Asian     | 149.60 | 1 | 1 |
| Berber              | OmotiC              | Northern European   | 149.63 | 1 | 1 |
| Southern European   | Northern European   | Arabian             | 149.72 | 1 | 1 |
| Nilo-Saharan        | Native American     | Khoisan             | 149.72 | 1 | 1 |

|                     |                     |                     |        |   |   |
|---------------------|---------------------|---------------------|--------|---|---|
| Levantine-Caucasian | Chinese             | Native American     | 149.94 | 1 | 1 |
| Nilo-Saharan        | Native American     | Melanesian          | 150.09 | 1 | 1 |
| Southern European   | Chinese             | Omotc               | 150.10 | 1 | 1 |
| Levantine-Caucasian | Omotc               | Niger-Congo         | 150.28 | 1 | 1 |
| Levantine-Caucasian | Pygmy               | Japanese            | 150.44 | 1 | 1 |
| Berber              | Cushitic            | Levantine-Caucasian | 150.46 | 1 | 1 |
| Southeast Asian     | Niger-Congo         | Native American     | 150.61 | 1 | 1 |
| Levantine-Caucasian | Arabian             | Northern European   | 150.62 | 1 | 1 |
| Southeast Asian     | Levantine-Caucasian | Native American     | 150.69 | 1 | 1 |
| Khoisan             | Arabian             | Japanese            | 150.71 | 1 | 1 |
| Pygmy               | Kalash              | Native American     | 150.86 | 1 | 1 |
| Pygmy               | Chinese             | Melanesian          | 151.10 | 1 | 1 |
| Khoisan             | Kalash              | Native American     | 151.15 | 1 | 1 |
| Berber              | Levantine-Caucasian | Cushitic            | 151.32 | 1 | 1 |
| Southeast Asian     | Cushitic            | Native American     | 151.56 | 1 | 1 |
| Southeast Asian     | Kalash              | Southern European   | 151.99 | 1 | 1 |
| Niger-Congo         | Chinese             | Native American     | 152.12 | 1 | 1 |
| Pygmy               | Arabian             | Japanese            | 152.16 | 1 | 1 |
| Levantine-Caucasian | Khoisan             | Southeast Asian     | 152.17 | 1 | 1 |
| Omotc               | Arabian             | Niger-Congo         | 152.54 | 1 | 1 |
| Southern European   | Nilo-Saharan        | Siberian            | 152.56 | 1 | 1 |
| Omotc               | Siberian            | Melanesian          | 152.57 | 1 | 1 |
| Japanese            | Northern European   | Cushitic            | 152.64 | 1 | 1 |
| Indian              | Omotc               | Japanese            | 152.65 | 1 | 1 |
| Berber              | Cushitic            | Southern European   | 152.99 | 1 | 1 |
| Chinese             | Native American     | Indian              | 153.01 | 1 | 1 |
| Levantine-Caucasian | Pygmy               | Southeast Asian     | 153.17 | 1 | 1 |
| Chinese             | Northern European   | Cushitic            | 153.20 | 1 | 1 |
| Cushitic            | Kalash              | Siberian            | 153.58 | 1 | 1 |
| Levantine-Caucasian | Japanese            | Omotc               | 153.59 | 1 | 1 |
| Chinese             | Native American     | Kalash              | 153.60 | 1 | 1 |
| Indian              | Native American     | Arabian             | 153.69 | 1 | 1 |
| Southern European   | Siberian            | Omotc               | 153.70 | 1 | 1 |
| Southeast Asian     | Kalash              | Cushitic            | 153.79 | 1 | 1 |
| Nilo-Saharan        | Indian              | Japanese            | 154.12 | 1 | 1 |
| Indian              | Native American     | Levantine-Caucasian | 154.21 | 1 | 1 |
| Levantine-Caucasian | Cushitic            | Omotc               | 154.65 | 1 | 1 |
| Pygmy               | Arabian             | Southeast Asian     | 154.76 | 1 | 1 |
| Japanese            | Native American     | Kalash              | 154.89 | 1 | 1 |
| Indian              | Kalash              | Berber              | 154.96 | 1 | 1 |
| Native American     | Siberian            | Indian              | 154.97 | 1 | 1 |
| Indian              | Siberian            | Berber              | 154.98 | 1 | 1 |
| Levantine-Caucasian | Indian              | Southern European   | 155.05 | 1 | 1 |
| Japanese            | Native American     | Indian              | 155.10 | 1 | 1 |
| Levantine-Caucasian | Chinese             | Omotc               | 155.68 | 1 | 1 |
| Japanese            | Kalash              | Southern European   | 155.84 | 1 | 1 |
| Berber              | Cushitic            | Omotc               | 155.88 | 1 | 1 |
| Arabian             | Northern European   | Indian              | 156.05 | 1 | 1 |
| Khoisan             | Chinese             | Melanesian          | 156.63 | 1 | 1 |
| Southern European   | Indian              | Cushitic            | 156.86 | 1 | 1 |
| Melanesian          | Cushitic            | Niger-Congo         | 157.13 | 1 | 1 |

|                     |                   |                     |        |   |   |
|---------------------|-------------------|---------------------|--------|---|---|
| Niger-Congo         | Indian            | Japanese            | 157.16 | 1 | 1 |
| Berber              | Arabian           | Kalash              | 157.17 | 1 | 1 |
| Khoisan             | Arabian           | Southeast Asian     | 157.50 | 1 | 1 |
| Chinese             | Kalash            | Southern European   | 157.61 | 1 | 1 |
| Melanesian          | Native American   | Cushitic            | 157.80 | 1 | 1 |
| Levantine-Caucasian | Siberian          | Omotc               | 158.08 | 1 | 1 |
| Indian              | Omotc             | Southeast Asian     | 158.11 | 1 | 1 |
| Southern European   | Arabian           | Kalash              | 158.14 | 1 | 1 |
| Southern European   | Northern European | Kalash              | 158.23 | 1 | 1 |
| Southern European   | Cushitic          | Omotc               | 158.46 | 1 | 1 |
| Kalash              | Native American   | Cushitic            | 158.47 | 1 | 1 |
| Southern European   | Berber            | Northern European   | 158.51 | 1 | 1 |
| Nilo-Saharan        | Indian            | Southeast Asian     | 158.72 | 1 | 1 |
| Southern European   | Arabian           | Northern European   | 158.74 | 1 | 1 |
| Pygmy               | Kalash            | Melanesian          | 158.92 | 1 | 1 |
| Omotc               | Native American   | Khoisan             | 159.06 | 1 | 1 |
| Southern European   | Niger-Congo       | Siberian            | 159.22 | 1 | 1 |
| Southeast Asian     | Cushitic          | Nilo-Saharan        | 159.39 | 1 | 1 |
| Berber              | Khoisan           | Siberian            | 159.40 | 1 | 1 |
| Khoisan             | Cushitic          | Kalash              | 159.41 | 1 | 1 |
| Niger-Congo         | Siberian          | Khoisan             | 159.68 | 1 | 1 |
| Pygmy               | Omotc             | Cushitic            | 159.77 | 1 | 1 |
| Berber              | Northern European | Cushitic            | 159.79 | 1 | 1 |
| Southeast Asian     | Omotc             | Melanesian          | 159.84 | 1 | 1 |
| Cushitic            | Chinese           | Nilo-Saharan        | 159.92 | 1 | 1 |
| Indian              | Kalash            | Arabian             | 160.27 | 1 | 1 |
| Khoisan             | Pygmy             | Nilo-Saharan        | 160.63 | 1 | 1 |
| Japanese            | Cushitic          | Nilo-Saharan        | 160.63 | 1 | 1 |
| Berber              | Indian            | Omotc               | 160.87 | 1 | 1 |
| Chinese             | Kalash            | Cushitic            | 161.17 | 1 | 1 |
| Khoisan             | Omotc             | Cushitic            | 161.36 | 1 | 1 |
| Melanesian          | Native American   | Levantine-Caucasian | 161.36 | 1 | 1 |
| Berber              | Nilo-Saharan      | Southern European   | 161.41 | 1 | 1 |
| Japanese            | Kalash            | Cushitic            | 161.52 | 1 | 1 |
| Khoisan             | Cushitic          | Arabian             | 161.62 | 1 | 1 |
| Niger-Congo         | Native American   | Melanesian          | 161.64 | 1 | 1 |
| Indian              | Siberian          | Northern European   | 161.66 | 1 | 1 |
| Nilo-Saharan        | Siberian          | Melanesian          | 162.05 | 1 | 1 |
| Khoisan             | Kalash            | Melanesian          | 162.19 | 1 | 1 |
| Cushitic            | Siberian          | Nilo-Saharan        | 162.63 | 1 | 1 |
| Japanese            | Omotc             | Melanesian          | 162.65 | 1 | 1 |
| Niger-Congo         | Omotc             | Cushitic            | 163.17 | 1 | 1 |
| Kalash              | Siberian          | Cushitic            | 163.66 | 1 | 1 |
| Melanesian          | Berber            | Nilo-Saharan        | 164.08 | 1 | 1 |
| Melanesian          | Siberian          | Omotc               | 164.19 | 1 | 1 |
| Niger-Congo         | Indian            | Southeast Asian     | 164.22 | 1 | 1 |
| Pygmy               | Cushitic          | Kalash              | 164.98 | 1 | 1 |
| Cushitic            | Arabian           | Omotc               | 165.05 | 1 | 1 |
| Southern European   | Omotc             | Siberian            | 165.32 | 1 | 1 |
| Niger-Congo         | Japanese          | Southern European   | 165.35 | 1 | 1 |
| Cushitic            | Native American   | Melanesian          | 165.54 | 1 | 1 |

|                     |                   |                   |        |   |   |
|---------------------|-------------------|-------------------|--------|---|---|
| Melanesian          | Berber            | Pygmy             | 165.58 | 1 | 1 |
| Southeast Asian     | Kalash            | Omotc             | 165.62 | 1 | 1 |
| Berber              | Nilo-Saharan      | Northern European | 165.63 | 1 | 1 |
| Khoisan             | Cushitic          | Indian            | 165.71 | 1 | 1 |
| Nilo-Saharan        | Arabian           | Siberian          | 165.90 | 1 | 1 |
| Niger-Congo         | Kalash            | Chinese           | 166.20 | 1 | 1 |
| Southeast Asian     | Nilo-Saharan      | Southern European | 166.40 | 1 | 1 |
| Berber              | Pygmy             | Siberian          | 166.41 | 1 | 1 |
| Nilo-Saharan        | Kalash            | Chinese           | 166.48 | 1 | 1 |
| Japanese            | Nilo-Saharan      | Southern European | 166.53 | 1 | 1 |
| Berber              | Northern European | Indian            | 166.73 | 1 | 1 |
| Nilo-Saharan        | Siberian          | Khoisan           | 166.75 | 1 | 1 |
| Southeast Asian     | Niger-Congo       | Southern European | 166.96 | 1 | 1 |
| Berber              | Kalash            | Omotc             | 167.01 | 1 | 1 |
| Levantine-Caucasian | Nilo-Saharan      | Siberian          | 167.28 | 1 | 1 |
| Southeast Asian     | Northern European | Omotc             | 167.31 | 1 | 1 |
| Nilo-Saharan        | Northern European | Japanese          | 167.44 | 1 | 1 |
| Southeast Asian     | Niger-Congo       | Khoisan           | 167.63 | 1 | 1 |
| Southern European   | Kalash            | Cushitic          | 167.78 | 1 | 1 |
| Niger-Congo         | Kalash            | Khoisan           | 167.78 | 1 | 1 |
| Kalash              | Omotc             | Chinese           | 167.80 | 1 | 1 |
| Northern European   | Siberian          | Cushitic          | 167.85 | 1 | 1 |
| Kalash              | Native American   | Omotc             | 167.97 | 1 | 1 |
| Cushitic            | Native American   | Pygmy             | 167.97 | 1 | 1 |
| Berber              | Arabian           | Northern European | 168.27 | 1 | 1 |
| Berber              | Cushitic          | Kalash            | 168.66 | 1 | 1 |
| Melanesian          | Southeast Asian   | Berber            | 168.87 | 1 | 1 |
| Niger-Congo         | Arabian           | Siberian          | 168.88 | 1 | 1 |
| Cushitic            | Omotc             | Arabian           | 169.05 | 1 | 1 |
| Japanese            | Indian            | Native American   | 169.75 | 1 | 1 |
| Cushitic            | Indian            | Siberian          | 170.50 | 1 | 1 |
| Melanesian          | Indian            | Southern European | 170.58 | 1 | 1 |
| Pygmy               | Cushitic          | Arabian           | 170.79 | 1 | 1 |
| Pygmy               | Indian            | Chinese           | 170.93 | 1 | 1 |
| Melanesian          | Japanese          | Berber            | 171.05 | 1 | 1 |
| Khoisan             | Pygmy             | Niger-Congo       | 171.24 | 1 | 1 |
| Khoisan             | Indian            | Chinese           | 171.29 | 1 | 1 |
| Nilo-Saharan        | Indian            | Southern European | 171.35 | 1 | 1 |
| Niger-Congo         | Siberian          | Melanesian        | 171.49 | 1 | 1 |
| Southeast Asian     | Indian            | Berber            | 171.63 | 1 | 1 |
| Niger-Congo         | Indian            | Southern European | 171.64 | 1 | 1 |
| Southern European   | Berber            | Kalash            | 171.71 | 1 | 1 |
| Japanese            | Indian            | Berber            | 171.98 | 1 | 1 |
| Berber              | Niger-Congo       | Southern European | 172.14 | 1 | 1 |
| Pygmy               | Cushitic          | Indian            | 172.27 | 1 | 1 |
| Native American     | Northern European | Cushitic          | 172.30 | 1 | 1 |
| Japanese            | Kalash            | Omotc             | 172.41 | 1 | 1 |
| Levantine-Caucasian | Niger-Congo       | Siberian          | 172.52 | 1 | 1 |
| Omotc               | Siberian          | Khoisan           | 172.55 | 1 | 1 |
| Niger-Congo         | Japanese          | Khoisan           | 172.74 | 1 | 1 |
| Nilo-Saharan        | Omotc             | Cushitic          | 173.24 | 1 | 1 |

|                     |                   |                   |        |   |   |
|---------------------|-------------------|-------------------|--------|---|---|
| Melanesian          | Siberian          | Arabian           | 173.52 | 1 | 1 |
| Levantine-Caucasian | OmotiC            | Siberian          | 173.74 | 1 | 1 |
| Berber              | Kalash            | Siberian          | 173.84 | 1 | 1 |
| Chinese             | Indian            | Berber            | 173.86 | 1 | 1 |
| Niger-Congo         | Northern European | Japanese          | 174.02 | 1 | 1 |
| Melanesian          | Chinese           | Berber            | 174.05 | 1 | 1 |
| Nilo-Saharan        | Kalash            | Khoisan           | 174.14 | 1 | 1 |
| Kalash              | Siberian          | OmotiC            | 174.25 | 1 | 1 |
| Cushitic            | Arabian           | Indian            | 174.67 | 1 | 1 |
| Chinese             | Kalash            | OmotiC            | 174.68 | 1 | 1 |
| Southeast Asian     | Nilo-Saharan      | Melanesian        | 174.78 | 1 | 1 |
| Indian              | Siberian          | Arabian           | 175.02 | 1 | 1 |
| Southeast Asian     | Nilo-Saharan      | Khoisan           | 175.05 | 1 | 1 |
| Berber              | Niger-Congo       | Northern European | 175.45 | 1 | 1 |
| Southeast Asian     | Kalash            | Melanesian        | 175.52 | 1 | 1 |
| OmotiC              | Northern European | Japanese          | 175.74 | 1 | 1 |
| Berber              | Native American   | Melanesian        | 175.85 | 1 | 1 |
| Niger-Congo         | Chinese           | Khoisan           | 176.00 | 1 | 1 |
| OmotiC              | Arabian           | Siberian          | 176.14 | 1 | 1 |
| Arabian             | Northern European | Cushitic          | 176.16 | 1 | 1 |
| Kalash              | Native American   | Melanesian        | 176.48 | 1 | 1 |
| Niger-Congo         | Chinese           | Southern European | 176.79 | 1 | 1 |
| Nilo-Saharan        | Northern European | Southeast Asian   | 176.92 | 1 | 1 |
| Southern European   | Berber            | Cushitic          | 177.03 | 1 | 1 |
| Cushitic            | Siberian          | Melanesian        | 177.16 | 1 | 1 |
| Levantine-Caucasian | Arabian           | Cushitic          | 177.50 | 1 | 1 |
| Melanesian          | Southeast Asian   | OmotiC            | 177.58 | 1 | 1 |
| Chinese             | OmotiC            | Melanesian        | 177.71 | 1 | 1 |
| Southeast Asian     | OmotiC            | Khoisan           | 177.89 | 1 | 1 |
| Kalash              | OmotiC            | Native American   | 177.90 | 1 | 1 |
| Nilo-Saharan        | Chinese           | Southern European | 177.98 | 1 | 1 |
| Japanese            | Nilo-Saharan      | Khoisan           | 178.05 | 1 | 1 |
| Japanese            | Nilo-Saharan      | Melanesian        | 178.05 | 1 | 1 |
| Berber              | Indian            | Siberian          | 178.51 | 1 | 1 |
| Japanese            | Northern European | OmotiC            | 178.78 | 1 | 1 |
| Southern European   | Nilo-Saharan      | Japanese          | 179.01 | 1 | 1 |
| Cushitic            | OmotiC            | Kalash            | 179.13 | 1 | 1 |
| Southeast Asian     | Siberian          | Indian            | 179.64 | 1 | 1 |
| Cushitic            | Kalash            | Japanese          | 179.88 | 1 | 1 |
| Nilo-Saharan        | Kalash            | Native American   | 179.90 | 1 | 1 |
| Kalash              | Siberian          | Melanesian        | 179.99 | 1 | 1 |
| Southeast Asian     | Siberian          | Native American   | 180.57 | 1 | 1 |
| Melanesian          | Japanese          | OmotiC            | 180.70 | 1 | 1 |
| Melanesian          | Siberian          | Cushitic          | 180.84 | 1 | 1 |
| Melanesian          | Siberian          | Northern European | 180.89 | 1 | 1 |
| Japanese            | OmotiC            | Khoisan           | 180.98 | 1 | 1 |
| Japanese            | Kalash            | Melanesian        | 181.14 | 1 | 1 |
| Niger-Congo         | Kalash            | Native American   | 181.44 | 1 | 1 |
| Indian              | Kalash            | Siberian          | 181.85 | 1 | 1 |
| Nilo-Saharan        | Chinese           | Khoisan           | 181.98 | 1 | 1 |
| OmotiC              | Northern European | Southeast Asian   | 182.02 | 1 | 1 |

|                     |                     |                     |        |   |   |
|---------------------|---------------------|---------------------|--------|---|---|
| Chinese             | Northern European   | Omotic              | 182.52 | 1 | 1 |
| Indian              | Siberian            | Levantine-Caucasian | 182.59 | 1 | 1 |
| Pygmy               | Northern European   | Chinese             | 182.70 | 1 | 1 |
| Berber              | Levantine-Caucasian | Indian              | 182.71 | 1 | 1 |
| Chinese             | Indian              | Native American     | 182.79 | 1 | 1 |
| Levantine-Caucasian | Indian              | Cushitic            | 182.99 | 1 | 1 |
| Melanesian          | Arabian             | Pygmy               | 183.17 | 1 | 1 |
| Levantine-Caucasian | Arabian             | Indian              | 183.69 | 1 | 1 |
| Southeast Asian     | Cushitic            | Melanesian          | 183.79 | 1 | 1 |
| Cushitic            | Siberian            | Pygmy               | 183.88 | 1 | 1 |
| Berber              | Siberian            | Melanesian          | 184.13 | 1 | 1 |
| Pygmy               | Northern European   | Native American     | 184.24 | 1 | 1 |
| Southern European   | Nilo-Saharan        | Southeast Asian     | 184.29 | 1 | 1 |
| Chinese             | Omotic              | Khoisan             | 184.31 | 1 | 1 |
| Melanesian          | Chinese             | Omotic              | 184.58 | 1 | 1 |
| Kalash              | Omotic              | Khoisan             | 185.16 | 1 | 1 |
| Southeast Asian     | Berber              | Melanesian          | 185.16 | 1 | 1 |
| Berber              | Khoisan             | Japanese            | 185.32 | 1 | 1 |
| Niger-Congo         | Northern European   | Southeast Asian     | 185.42 | 1 | 1 |
| Arabian             | Native American     | Melanesian          | 185.44 | 1 | 1 |
| Levantine-Caucasian | Northern European   | Indian              | 185.49 | 1 | 1 |
| Southeast Asian     | Indian              | Native American     | 185.69 | 1 | 1 |
| Southeast Asian     | Cushitic            | Pygmy               | 185.96 | 1 | 1 |
| Cushitic            | Kalash              | Southeast Asian     | 186.11 | 1 | 1 |
| Japanese            | Cushitic            | Melanesian          | 186.13 | 1 | 1 |
| Southeast Asian     | Siberian            | Kalash              | 186.29 | 1 | 1 |
| Melanesian          | Southern European   | Pygmy               | 186.37 | 1 | 1 |
| Indian              | Native American     | Omotic              | 186.48 | 1 | 1 |
| Cushitic            | Arabian             | Northern European   | 186.67 | 1 | 1 |
| Southeast Asian     | Niger-Congo         | Melanesian          | 186.73 | 1 | 1 |
| Native American     | Northern European   | Omotic              | 186.77 | 1 | 1 |
| Southern European   | Niger-Congo         | Japanese            | 186.90 | 1 | 1 |
| Japanese            | Cushitic            | Pygmy               | 187.19 | 1 | 1 |
| Indian              | Native American     | Cushitic            | 187.26 | 1 | 1 |
| Berber              | Pygmy               | Japanese            | 187.33 | 1 | 1 |
| Kalash              | Omotic              | Melanesian          | 187.85 | 1 | 1 |
| Northern European   | Siberian            | Omotic              | 188.04 | 1 | 1 |
| Khoisan             | Northern European   | Native American     | 188.19 | 1 | 1 |
| Southern European   | Arabian             | Cushitic            | 188.44 | 1 | 1 |
| Pygmy               | Indian              | Native American     | 188.57 | 1 | 1 |
| Khoisan             | Indian              | Native American     | 189.76 | 1 | 1 |
| Melanesian          | Arabian             | Nilo-Saharan        | 189.82 | 1 | 1 |
| Melanesian          | Southern European   | Nilo-Saharan        | 189.94 | 1 | 1 |
| Kalash              | Arabian             | Siberian            | 190.13 | 1 | 1 |
| Southern European   | Pygmy               | Chinese             | 190.24 | 1 | 1 |
| Khoisan             | Northern European   | Chinese             | 190.53 | 1 | 1 |
| Berber              | Japanese            | Melanesian          | 190.67 | 1 | 1 |
| Southeast Asian     | Native American     | Melanesian          | 190.73 | 1 | 1 |
| Niger-Congo         | Omotic              | Khoisan             | 190.79 | 1 | 1 |
| Cushitic            | Omotic              | Indian              | 190.91 | 1 | 1 |
| Berber              | Khoisan             | Southeast Asian     | 191.06 | 1 | 1 |

|                     |                     |                     |        |   |   |
|---------------------|---------------------|---------------------|--------|---|---|
| Melanesian          | Levantine-Caucasian | Pygmy               | 191.06 | 1 | 1 |
| Cushitic            | Chinese             | Pygmy               | 191.22 | 1 | 1 |
| Melanesian          | Native American     | Southern European   | 191.33 | 1 | 1 |
| Southern European   | Omotc               | Japanese            | 191.41 | 1 | 1 |
| Niger-Congo         | Japanese            | Melanesian          | 191.45 | 1 | 1 |
| Pygmy               | Indian              | Melanesian          | 191.82 | 1 | 1 |
| Cushitic            | Indian              | Japanese            | 192.02 | 1 | 1 |
| Arabian             | Siberian            | Melanesian          | 192.50 | 1 | 1 |
| Indian              | Arabian             | Siberian            | 192.56 | 1 | 1 |
| Berber              | Pygmy               | Southeast Asian     | 192.64 | 1 | 1 |
| Melanesian          | Cushitic            | Khoisan             | 192.66 | 1 | 1 |
| Levantine-Caucasian | Nilo-Saharan        | Japanese            | 193.14 | 1 | 1 |
| Nilo-Saharan        | Arabian             | Japanese            | 193.25 | 1 | 1 |
| Chinese             | Kalash              | Melanesian          | 193.39 | 1 | 1 |
| Southeast Asian     | Arabian             | Melanesian          | 193.49 | 1 | 1 |
| Levantine-Caucasian | Kalash              | Cushitic            | 194.42 | 1 | 1 |
| Southern European   | Omotc               | Southeast Asian     | 194.48 | 1 | 1 |
| Niger-Congo         | Arabian             | Khoisan             | 194.60 | 1 | 1 |
| Southern European   | Niger-Congo         | Southeast Asian     | 194.72 | 1 | 1 |
| Melanesian          | Siberian            | Levantine-Caucasian | 194.76 | 1 | 1 |
| Khoisan             | Nilo-Saharan        | Cushitic            | 195.16 | 1 | 1 |
| Indian              | Arabian             | Omotc               | 195.53 | 1 | 1 |
| Indian              | Northern European   | Siberian            | 195.60 | 1 | 1 |
| Melanesian          | Levantine-Caucasian | Nilo-Saharan        | 195.61 | 1 | 1 |
| Southern European   | Niger-Congo         | Khoisan             | 195.84 | 1 | 1 |
| Southern European   | Nilo-Saharan        | Khoisan             | 195.93 | 1 | 1 |
| Berber              | Cushitic            | Northern European   | 196.39 | 1 | 1 |
| Indian              | Kalash              | Southern European   | 196.45 | 1 | 1 |
| Cushitic            | Indian              | Southeast Asian     | 196.46 | 1 | 1 |
| Berber              | Cushitic            | Indian              | 196.68 | 1 | 1 |
| Melanesian          | Kalash              | Pygmy               | 196.92 | 1 | 1 |
| Niger-Congo         | Arabian             | Japanese            | 196.95 | 1 | 1 |
| Nilo-Saharan        | Arabian             | Khoisan             | 197.86 | 1 | 1 |
| Southern European   | Indian              | Siberian            | 198.02 | 1 | 1 |
| Southern European   | Pygmy               | Native American     | 198.43 | 1 | 1 |
| Kalash              | Arabian             | Omotc               | 198.43 | 1 | 1 |
| Japanese            | Indian              | Northern European   | 198.50 | 1 | 1 |
| Indian              | Native American     | Southern European   | 198.55 | 1 | 1 |
| Melanesian          | Northern European   | Pygmy               | 198.58 | 1 | 1 |
| Nilo-Saharan        | Arabian             | Southeast Asian     | 198.60 | 1 | 1 |
| Nilo-Saharan        | Kalash              | Melanesian          | 198.66 | 1 | 1 |
| Japanese            | Indian              | Arabian             | 198.76 | 1 | 1 |
| Berber              | Arabian             | Indian              | 198.76 | 1 | 1 |
| Levantine-Caucasian | Omotc               | Japanese            | 198.77 | 1 | 1 |
| Japanese            | Arabian             | Melanesian          | 198.91 | 1 | 1 |
| Levantine-Caucasian | Nilo-Saharan        | Southeast Asian     | 199.02 | 1 | 1 |
| Indian              | Native American     | Melanesian          | 199.03 | 1 | 1 |
| Khoisan             | Indian              | Melanesian          | 199.10 | 1 | 1 |
| Southern European   | Levantine-Caucasian | Indian              | 199.53 | 1 | 1 |
| Indian              | Omotc               | Chinese             | 199.59 | 1 | 1 |
| Southeast Asian     | Indian              | Arabian             | 199.80 | 1 | 1 |



|                     |                   |                   |        |   |   |
|---------------------|-------------------|-------------------|--------|---|---|
| Southern European   | Native American   | Melanesian        | 199.91 | 1 | 1 |
| Melanesian          | Southeast Asian   | Arabian           | 200.08 | 1 | 1 |
| Melanesian          | Southeast Asian   | Cushitic          | 200.11 | 1 | 1 |
| Southern European   | Kalash            | Siberian          | 201.07 | 1 | 1 |
| Indian              | Siberian          | Omotic            | 201.28 | 1 | 1 |
| Levantine-Caucasian | Niger-Congo       | Japanese          | 201.32 | 1 | 1 |
| Indian              | Siberian          | Cushitic          | 201.48 | 1 | 1 |
| Kalash              | Northern European | Siberian          | 201.59 | 1 | 1 |
| Chinese             | Indian            | Arabian           | 201.68 | 1 | 1 |
| Berber              | Omotic            | Siberian          | 201.70 | 1 | 1 |
| Indian              | Northern European | Cushitic          | 201.96 | 1 | 1 |
| Omotic              | Arabian           | Japanese          | 201.97 | 1 | 1 |
| Nilo-Saharan        | Indian            | Khoisan           | 202.00 | 1 | 1 |
| Southeast Asian     | Native American   | Berber            | 202.13 | 1 | 1 |
| Southern European   | Siberian          | Melanesian        | 202.32 | 1 | 1 |
| Nilo-Saharan        | Northern European | Khoisan           | 202.54 | 1 | 1 |
| Niger-Congo         | Indian            | Khoisan           | 202.75 | 1 | 1 |
| Southeast Asian     | Indian            | Northern European | 202.83 | 1 | 1 |
| Niger-Congo         | Arabian           | Southeast Asian   | 203.06 | 1 | 1 |
| Melanesian          | Japanese          | Arabian           | 203.06 | 1 | 1 |
| Southern European   | Khoisan           | Chinese           | 203.23 | 1 | 1 |
| Pygmy               | Arabian           | Chinese           | 203.53 | 1 | 1 |
| Levantine-Caucasian | Omotic            | Southeast Asian   | 203.54 | 1 | 1 |
| Cushitic            | Native American   | Niger-Congo       | 203.69 | 1 | 1 |
| Levantine-Caucasian | Niger-Congo       | Khoisan           | 203.95 | 1 | 1 |
| Chinese             | Indian            | Northern European | 204.01 | 1 | 1 |
| Levantine-Caucasian | Pygmy             | Chinese           | 204.03 | 1 | 1 |
| Nilo-Saharan        | Chinese           | Melanesian        | 204.05 | 1 | 1 |
| Cushitic            | Kalash            | Nilo-Saharan      | 204.06 | 1 | 1 |
| Melanesian          | Japanese          | Cushitic          | 204.15 | 1 | 1 |
| Niger-Congo         | Northern European | Khoisan           | 204.30 | 1 | 1 |
| Levantine-Caucasian | Native American   | Melanesian        | 204.31 | 1 | 1 |
| Omotic              | Arabian           | Southeast Asian   | 204.33 | 1 | 1 |
| Kalash              | Northern European | Cushitic          | 204.43 | 1 | 1 |
| Indian              | Omotic            | Khoisan           | 204.44 | 1 | 1 |
| Berber              | Indian            | Japanese          | 204.88 | 1 | 1 |
| Levantine-Caucasian | Nilo-Saharan      | Khoisan           | 205.24 | 1 | 1 |
| Levantine-Caucasian | Pygmy             | Native American   | 205.29 | 1 | 1 |
| Cushitic            | Indian            | Nilo-Saharan      | 205.92 | 1 | 1 |
| Berber              | Kalash            | Japanese          | 205.98 | 1 | 1 |
| Pygmy               | Arabian           | Native American   | 206.02 | 1 | 1 |
| Levantine-Caucasian | Siberian          | Melanesian        | 206.32 | 1 | 1 |
| Southern European   | Southeast Asian   | Melanesian        | 206.62 | 1 | 1 |
| Nilo-Saharan        | Cushitic          | Kalash            | 207.71 | 1 | 1 |
| Cushitic            | Chinese           | Melanesian        | 207.82 | 1 | 1 |
| Native American     | Siberian          | Melanesian        | 208.00 | 1 | 1 |
| Nilo-Saharan        | Cushitic          | Arabian           | 208.02 | 1 | 1 |
| Indian              | Siberian          | Melanesian        | 208.07 | 1 | 1 |
| Southern European   | Khoisan           | Native American   | 208.39 | 1 | 1 |
| Levantine-Caucasian | Niger-Congo       | Southeast Asian   | 208.39 | 1 | 1 |
| Melanesian          | Chinese           | Arabian           | 208.40 | 1 | 1 |

|                     |                     |                     |        |   |   |
|---------------------|---------------------|---------------------|--------|---|---|
| Southeast Asian     | Levantine-Caucasian | Melanesian          | 208.98 | 1 | 1 |
| Southeast Asian     | Indian              | Omotc               | 209.20 | 1 | 1 |
| Khoisan             | Cushitic            | Levantine-Caucasian | 209.24 | 1 | 1 |
| Cushitic            | Omotc               | Levantine-Caucasian | 209.35 | 1 | 1 |
| Nilo-Saharan        | Omotc               | Khoisan             | 209.58 | 1 | 1 |
| Southern European   | Indian              | Omotc               | 209.67 | 1 | 1 |
| Pygmy               | Arabian             | Melanesian          | 209.73 | 1 | 1 |
| Omotc               | Northern European   | Khoisan             | 209.75 | 1 | 1 |
| Indian              | Kalash              | Cushitic            | 209.80 | 1 | 1 |
| Berber              | Chinese             | Melanesian          | 209.83 | 1 | 1 |
| Japanese            | Indian              | Levantine-Caucasian | 209.85 | 1 | 1 |
| Niger-Congo         | Kalash              | Melanesian          | 209.96 | 1 | 1 |
| Pygmy               | Cushitic            | Levantine-Caucasian | 209.99 | 1 | 1 |
| Melanesian          | Chinese             | Cushitic            | 210.25 | 1 | 1 |
| Melanesian          | Northern European   | Nilo-Saharan        | 210.51 | 1 | 1 |
| Pygmy               | Omotc               | Berber              | 210.85 | 1 | 1 |
| Berber              | Nilo-Saharan        | Siberian            | 210.87 | 1 | 1 |
| Berber              | Indian              | Southeast Asian     | 211.03 | 1 | 1 |
| Nilo-Saharan        | Indian              | Chinese             | 211.37 | 1 | 1 |
| Southern European   | Arabian             | Indian              | 211.43 | 1 | 1 |
| Southern European   | Omotc               | Khoisan             | 211.95 | 1 | 1 |
| Southern European   | Japanese            | Melanesian          | 211.96 | 1 | 1 |
| Japanese            | Indian              | Omotc               | 211.99 | 1 | 1 |
| Pygmy               | Nilo-Saharan        | Cushitic            | 212.09 | 1 | 1 |
| Southeast Asian     | Indian              | Levantine-Caucasian | 212.19 | 1 | 1 |
| Levantine-Caucasian | Khoisan             | Native American     | 212.37 | 1 | 1 |
| Levantine-Caucasian | Indian              | Siberian            | 212.46 | 1 | 1 |
| Niger-Congo         | Cushitic            | Kalash              | 213.12 | 1 | 1 |
| Berber              | Kalash              | Southeast Asian     | 213.13 | 1 | 1 |
| Cushitic            | Northern European   | Siberian            | 213.14 | 1 | 1 |
| Omotc               | Arabian             | Khoisan             | 213.29 | 1 | 1 |
| Indian              | Kalash              | Japanese            | 213.35 | 1 | 1 |
| Southern European   | Levantine-Caucasian | Cushitic            | 213.56 | 1 | 1 |
| Melanesian          | Native American     | Pygmy               | 213.77 | 1 | 1 |
| Melanesian          | Berber              | Niger-Congo         | 214.16 | 1 | 1 |
| Niger-Congo         | Cushitic            | Arabian             | 214.19 | 1 | 1 |
| Pygmy               | Northern European   | Melanesian          | 214.34 | 1 | 1 |
| Southeast Asian     | Indian              | Cushitic            | 214.36 | 1 | 1 |
| Melanesian          | Kalash              | Nilo-Saharan        | 214.42 | 1 | 1 |
| Khoisan             | Omotc               | Berber              | 214.63 | 1 | 1 |
| Southern European   | Pygmy               | Melanesian          | 214.86 | 1 | 1 |
| Levantine-Caucasian | Japanese            | Melanesian          | 214.91 | 1 | 1 |
| Khoisan             | Arabian             | Native American     | 215.30 | 1 | 1 |
| Levantine-Caucasian | Khoisan             | Chinese             | 215.64 | 1 | 1 |
| Japanese            | Native American     | Melanesian          | 215.71 | 1 | 1 |
| Japanese            | Siberian            | Native American     | 216.00 | 1 | 1 |
| Cushitic            | Kalash              | Pygmy               | 216.06 | 1 | 1 |
| Khoisan             | Arabian             | Chinese             | 216.10 | 1 | 1 |
| Chinese             | Indian              | Levantine-Caucasian | 216.26 | 1 | 1 |
| Southeast Asian     | Northern European   | Melanesian          | 216.28 | 1 | 1 |
| Southern European   | Northern European   | Indian              | 216.34 | 1 | 1 |

|                     |                   |                   |        |   |   |
|---------------------|-------------------|-------------------|--------|---|---|
| Berber              | Native American   | Nilo-Saharan      | 216.63 | 1 | 1 |
| Indian              | Omotoc            | Native American   | 216.65 | 1 | 1 |
| Southern European   | Kalash            | Omotoc            | 217.02 | 1 | 1 |
| Levantine-Caucasian | Kalash            | Siberian          | 217.23 | 1 | 1 |
| Berber              | Omotoc            | Khoisan           | 217.35 | 1 | 1 |
| Chinese             | Indian            | Omotoc            | 217.38 | 1 | 1 |
| Japanese            | Indian            | Cushitic          | 217.49 | 1 | 1 |
| Nilo-Saharan        | Cushitic          | Indian            | 217.88 | 1 | 1 |
| Indian              | Kalash            | Southeast Asian   | 217.89 | 1 | 1 |
| Levantine-Caucasian | Omotoc            | Khoisan           | 218.02 | 1 | 1 |
| Cushitic            | Omotoc            | Khoisan           | 218.05 | 1 | 1 |
| Southeast Asian     | Indian            | Melanesian        | 218.14 | 1 | 1 |
| Levantine-Caucasian | Pygmy             | Melanesian        | 218.96 | 1 | 1 |
| Niger-Congo         | Indian            | Chinese           | 219.21 | 1 | 1 |
| Cushitic            | Siberian          | Niger-Congo       | 219.34 | 1 | 1 |
| Berber              | Native American   | Pygmy             | 219.39 | 1 | 1 |
| Southeast Asian     | Cushitic          | Niger-Congo       | 219.45 | 1 | 1 |
| Berber              | Nilo-Saharan      | Khoisan           | 219.52 | 1 | 1 |
| Cushitic            | Kalash            | Native American   | 220.04 | 1 | 1 |
| Northern European   | Siberian          | Melanesian        | 220.24 | 1 | 1 |
| Southern European   | Berber            | Indian            | 220.52 | 1 | 1 |
| Melanesian          | Southeast Asian   | Northern European | 220.78 | 1 | 1 |
| Niger-Congo         | Omotoc            | Berber            | 220.93 | 1 | 1 |
| Southeast Asian     | Berber            | Nilo-Saharan      | 221.00 | 1 | 1 |
| Indian              | Omotoc            | Melanesian        | 221.13 | 1 | 1 |
| Chinese             | Siberian          | Native American   | 221.16 | 1 | 1 |
| Melanesian          | Japanese          | Northern European | 221.46 | 1 | 1 |
| Japanese            | Cushitic          | Niger-Congo       | 221.58 | 1 | 1 |
| Japanese            | Indian            | Melanesian        | 221.86 | 1 | 1 |
| Melanesian          | Indian            | Pygmy             | 222.28 | 1 | 1 |
| Berber              | Niger-Congo       | Siberian          | 222.56 | 1 | 1 |
| Niger-Congo         | Cushitic          | Indian            | 222.65 | 1 | 1 |
| Indian              | Siberian          | Southern European | 222.70 | 1 | 1 |
| Indian              | Kalash            | Omotoc            | 222.74 | 1 | 1 |
| Khoisan             | Arabian           | Melanesian        | 223.11 | 1 | 1 |
| Omotoc              | Northern European | Native American   | 223.31 | 1 | 1 |
| Berber              | Arabian           | Omotoc            | 223.55 | 1 | 1 |
| Khoisan             | Cushitic          | Siberian          | 223.55 | 1 | 1 |
| Chinese             | Indian            | Cushitic          | 223.62 | 1 | 1 |
| Southeast Asian     | Native American   | Omotoc            | 223.95 | 1 | 1 |
| Chinese             | Arabian           | Melanesian        | 224.30 | 1 | 1 |
| Melanesian          | Siberian          | Southern European | 224.32 | 1 | 1 |
| Native American     | Siberian          | Berber            | 224.41 | 1 | 1 |
| Southeast Asian     | Siberian          | Melanesian        | 224.59 | 1 | 1 |
| Levantine-Caucasian | Indian            | Omotoc            | 224.63 | 1 | 1 |
| Pygmy               | Cushitic          | Siberian          | 224.69 | 1 | 1 |
| Berber              | Northern European | Omotoc            | 224.69 | 1 | 1 |
| Cushitic            | Chinese           | Niger-Congo       | 225.04 | 1 | 1 |
| Indian              | Arabian           | Japanese          | 225.11 | 1 | 1 |
| Japanese            | Northern European | Melanesian        | 225.53 | 1 | 1 |
| Berber              | Pygmy             | Melanesian        | 226.68 | 1 | 1 |

|                     |                     |                     |        |   |   |
|---------------------|---------------------|---------------------|--------|---|---|
| Berber              | Omotc               | Japanese            | 226.72 | 1 | 1 |
| Berber              | Niger-Congo         | Khoisan             | 226.98 | 1 | 1 |
| Native American     | Northern European   | Melanesian          | 227.08 | 1 | 1 |
| Berber              | Levantine-Caucasian | Omotc               | 227.19 | 1 | 1 |
| Berber              | Siberian            | Nilo-Saharan        | 227.48 | 1 | 1 |
| Cushitic            | Indian              | Pygmy               | 227.54 | 1 | 1 |
| Kalash              | Arabian             | Japanese            | 227.82 | 1 | 1 |
| Melanesian          | Southeast Asian     | Levantine-Caucasian | 227.83 | 1 | 1 |
| Berber              | Japanese            | Nilo-Saharan        | 228.01 | 1 | 1 |
| Niger-Congo         | Chinese             | Melanesian          | 228.06 | 1 | 1 |
| Chinese             | Native American     | Melanesian          | 228.92 | 1 | 1 |
| Khoisan             | Niger-Congo         | Cushitic            | 229.79 | 1 | 1 |
| Indian              | Arabian             | Southeast Asian     | 230.03 | 1 | 1 |
| Cushitic            | Kalash              | Chinese             | 230.06 | 1 | 1 |
| Southeast Asian     | Native American     | Northern European   | 230.16 | 1 | 1 |
| Nilo-Saharan        | Omotc               | Berber              | 230.41 | 1 | 1 |
| Berber              | Omotc               | Southeast Asian     | 230.45 | 1 | 1 |
| Berber              | Siberian            | Pygmy               | 230.47 | 1 | 1 |
| Melanesian          | Japanese            | Levantine-Caucasian | 230.48 | 1 | 1 |
| Southeast Asian     | Berber              | Pygmy               | 230.64 | 1 | 1 |
| Japanese            | Siberian            | Kalash              | 230.76 | 1 | 1 |
| Omotc               | Northern European   | Chinese             | 231.62 | 1 | 1 |
| Levantine-Caucasian | Kalash              | Omotc               | 231.80 | 1 | 1 |
| Cushitic            | Kalash              | Melanesian          | 231.99 | 1 | 1 |
| Nilo-Saharan        | Indian              | Native American     | 232.59 | 1 | 1 |
| Chinese             | Siberian            | Kalash              | 232.66 | 1 | 1 |
| Khoisan             | Northern European   | Melanesian          | 233.00 | 1 | 1 |
| Nilo-Saharan        | Cushitic            | Khoisan             | 233.20 | 1 | 1 |
| Indian              | Northern European   | Omotc               | 233.24 | 1 | 1 |
| Berber              | Pygmy               | Native American     | 233.44 | 1 | 1 |
| Kalash              | Northern European   | Omotc               | 233.53 | 1 | 1 |
| Melanesian          | Chinese             | Northern European   | 233.91 | 1 | 1 |
| Nilo-Saharan        | Northern European   | Native American     | 234.35 | 1 | 1 |
| Southern European   | Indian              | Japanese            | 234.64 | 1 | 1 |
| Melanesian          | Siberian            | Pygmy               | 234.70 | 1 | 1 |
| Japanese            | Native American     | Berber              | 234.72 | 1 | 1 |
| Berber              | Chinese             | Nilo-Saharan        | 234.94 | 1 | 1 |
| Niger-Congo         | Cushitic            | Khoisan             | 234.95 | 1 | 1 |
| Kalash              | Arabian             | Southeast Asian     | 235.37 | 1 | 1 |
| Nilo-Saharan        | Northern European   | Chinese             | 235.85 | 1 | 1 |
| Chinese             | Native American     | Berber              | 236.64 | 1 | 1 |
| Berber              | Kalash              | Native American     | 236.84 | 1 | 1 |
| Indian              | Northern European   | Japanese            | 236.88 | 1 | 1 |
| Berber              | Japanese            | Pygmy               | 236.89 | 1 | 1 |
| Berber              | Khoisan             | Melanesian          | 237.21 | 1 | 1 |
| Berber              | Pygmy               | Chinese             | 237.83 | 1 | 1 |
| Southeast Asian     | Native American     | Arabian             | 238.01 | 1 | 1 |
| Levantine-Caucasian | Khoisan             | Melanesian          | 238.03 | 1 | 1 |
| Cushitic            | Omotc               | Southern European   | 238.10 | 1 | 1 |
| Pygmy               | Cushitic            | Northern European   | 238.15 | 1 | 1 |
| Berber              | Khoisan             | Native American     | 238.42 | 1 | 1 |

|                     |                   |                     |        |   |   |
|---------------------|-------------------|---------------------|--------|---|---|
| Melanesian          | Berber            | Khoisan             | 238.51 | 1 | 1 |
| Southern European   | Khoisan           | Melanesian          | 238.52 | 1 | 1 |
| Khoisan             | Cushitic          | Northern European   | 239.05 | 1 | 1 |
| Berber              | Nilo-Saharan      | Japanese            | 239.57 | 1 | 1 |
| Khoisan             | Cushitic          | Southern European   | 239.71 | 1 | 1 |
| Pygmy               | Cushitic          | Southern European   | 239.85 | 1 | 1 |
| Japanese            | Siberian          | Indian              | 239.97 | 1 | 1 |
| Levantine-Caucasian | Northern European | Cushitic            | 240.70 | 1 | 1 |
| Southern European   | Indian            | Southeast Asian     | 240.95 | 1 | 1 |
| Pygmy               | Omotic            | Kalash              | 241.73 | 1 | 1 |
| Melanesian          | Chinese           | Levantine-Caucasian | 242.03 | 1 | 1 |
| Niger-Congo         | Indian            | Native American     | 242.27 | 1 | 1 |
| Native American     | Siberian          | Omotic              | 242.76 | 1 | 1 |
| Chinese             | Indian            | Melanesian          | 243.07 | 1 | 1 |
| Melanesian          | Native American   | Nilo-Saharan        | 243.19 | 1 | 1 |
| Berber              | Nilo-Saharan      | Southeast Asian     | 243.46 | 1 | 1 |
| Chinese             | Siberian          | Indian              | 243.88 | 1 | 1 |
| Southern European   | Kalash            | Japanese            | 244.19 | 1 | 1 |
| Native American     | Siberian          | Northern European   | 244.49 | 1 | 1 |
| Melanesian          | Indian            | Nilo-Saharan        | 244.51 | 1 | 1 |
| Indian              | Northern European | Southeast Asian     | 244.76 | 1 | 1 |
| Cushitic            | Omotic            | Northern European   | 244.98 | 1 | 1 |
| Berber              | Chinese           | Pygmy               | 245.34 | 1 | 1 |
| Khoisan             | Omotic            | Kalash              | 245.49 | 1 | 1 |
| Southern European   | Omotic            | Native American     | 245.97 | 1 | 1 |
| Southeast Asian     | Native American   | Cushitic            | 246.02 | 1 | 1 |
| Berber              | Khoisan           | Chinese             | 246.50 | 1 | 1 |
| Southeast Asian     | Japanese          | Kalash              | 246.66 | 1 | 1 |
| Southern European   | Chinese           | Melanesian          | 246.85 | 1 | 1 |
| Nilo-Saharan        | Indian            | Melanesian          | 246.88 | 1 | 1 |
| Southeast Asian     | Japanese          | Indian              | 247.27 | 1 | 1 |
| Kalash              | Northern European | Japanese            | 248.19 | 1 | 1 |
| Levantine-Caucasian | Chinese           | Melanesian          | 248.27 | 1 | 1 |
| Indian              | Kalash            | Native American     | 248.41 | 1 | 1 |
| Southeast Asian     | Japanese          | Native American     | 248.43 | 1 | 1 |
| Cushitic            | Omotic            | Siberian            | 248.45 | 1 | 1 |
| Arabian             | Native American   | Pygmy               | 248.47 | 1 | 1 |
| Southern European   | Berber            | Omotic              | 248.58 | 1 | 1 |
| Niger-Congo         | Pygmy             | Cushitic            | 248.65 | 1 | 1 |
| Berber              | Kalash            | Melanesian          | 248.67 | 1 | 1 |
| Southern European   | Nilo-Saharan      | Chinese             | 249.34 | 1 | 1 |
| Southern European   | Omotic            | Chinese             | 249.44 | 1 | 1 |
| Omotic              | Arabian           | Melanesian          | 249.89 | 1 | 1 |
| Levantine-Caucasian | Indian            | Japanese            | 249.92 | 1 | 1 |
| Southern European   | Kalash            | Southeast Asian     | 249.99 | 1 | 1 |
| Levantine-Caucasian | Omotic            | Native American     | 250.26 | 1 | 1 |
| Japanese            | Native American   | Omotic              | 250.37 | 1 | 1 |
| Niger-Congo         | Northern European | Native American     | 250.41 | 1 | 1 |
| Arabian             | Northern European | Omotic              | 250.49 | 1 | 1 |
| Omotic              | Northern European | Melanesian          | 250.58 | 1 | 1 |
| Cushitic            | Northern European | Nilo-Saharan        | 250.80 | 1 | 1 |

|                     |                   |                     |        |   |   |
|---------------------|-------------------|---------------------|--------|---|---|
| Omotc               | Arabian           | Native American     | 251.24 | 1 | 1 |
| Melanesian          | Southeast Asian   | Pygmy               | 251.70 | 1 | 1 |
| Pygmy               | Cushitic          | Southeast Asian     | 251.91 | 1 | 1 |
| Niger-Congo         | Northern European | Chinese             | 252.51 | 1 | 1 |
| Pygmy               | Cushitic          | Japanese            | 252.87 | 1 | 1 |
| Cushitic            | Indian            | Chinese             | 252.98 | 1 | 1 |
| Cushitic            | Indian            | Native American     | 254.33 | 1 | 1 |
| Melanesian          | Arabian           | Niger-Congo         | 254.37 | 1 | 1 |
| Chinese             | Native American   | Omotc               | 254.93 | 1 | 1 |
| Southern European   | Cushitic          | Siberian            | 255.02 | 1 | 1 |
| Levantine-Caucasian | Indian            | Southeast Asian     | 255.18 | 1 | 1 |
| Southern European   | Northern European | Cushitic            | 255.27 | 1 | 1 |
| Levantine-Caucasian | Cushitic          | Siberian            | 255.51 | 1 | 1 |
| Japanese            | Indian            | Southern European   | 255.66 | 1 | 1 |
| Berber              | Niger-Congo       | Japanese            | 255.70 | 1 | 1 |
| Khoisan             | Cushitic          | Japanese            | 255.81 | 1 | 1 |
| Kalash              | Arabian           | Native American     | 256.01 | 1 | 1 |
| Southeast Asian     | Indian            | Southern European   | 256.06 | 1 | 1 |
| Southern European   | Omotc             | Melanesian          | 256.15 | 1 | 1 |
| Melanesian          | Japanese          | Pygmy               | 256.23 | 1 | 1 |
| Omotc               | Arabian           | Chinese             | 256.52 | 1 | 1 |
| Khoisan             | Cushitic          | Southeast Asian     | 256.72 | 1 | 1 |
| Native American     | Siberian          | Arabian             | 256.81 | 1 | 1 |
| Southern European   | Nilo-Saharan      | Native American     | 256.83 | 1 | 1 |
| Kalash              | Northern European | Southeast Asian     | 257.67 | 1 | 1 |
| Levantine-Caucasian | Omotc             | Chinese             | 257.95 | 1 | 1 |
| Arabian             | Native American   | Nilo-Saharan        | 258.05 | 1 | 1 |
| Melanesian          | Southern European | Niger-Congo         | 258.15 | 1 | 1 |
| Berber              | Cushitic          | Nilo-Saharan        | 258.19 | 1 | 1 |
| Berber              | Indian            | Native American     | 258.20 | 1 | 1 |
| Cushitic            | Northern European | Japanese            | 258.29 | 1 | 1 |
| Levantine-Caucasian | Omotc             | Melanesian          | 258.56 | 1 | 1 |
| Nilo-Saharan        | Cushitic          | Levantine-Caucasian | 258.81 | 1 | 1 |
| Nilo-Saharan        | Arabian           | Native American     | 258.89 | 1 | 1 |
| Berber              | Northern European | Siberian            | 259.06 | 1 | 1 |
| Southeast Asian     | Siberian          | Berber              | 259.44 | 1 | 1 |
| Melanesian          | Arabian           | Khoisan             | 259.45 | 1 | 1 |
| Cushitic            | Native American   | Khoisan             | 259.57 | 1 | 1 |
| Kalash              | Native American   | Pygmy               | 259.64 | 1 | 1 |
| Berber              | Kalash            | Chinese             | 259.65 | 1 | 1 |
| Chinese             | Northern European | Melanesian          | 259.89 | 1 | 1 |
| Berber              | Omotc             | Melanesian          | 260.10 | 1 | 1 |
| Melanesian          | Southeast Asian   | Southern European   | 260.15 | 1 | 1 |
| Levantine-Caucasian | Arabian           | Omotc               | 260.36 | 1 | 1 |
| Nilo-Saharan        | Arabian           | Chinese             | 260.45 | 1 | 1 |
| Levantine-Caucasian | Kalash            | Japanese            | 260.50 | 1 | 1 |
| Arabian             | Siberian          | Pygmy               | 260.55 | 1 | 1 |
| Berber              | Niger-Congo       | Southeast Asian     | 260.60 | 1 | 1 |
| Japanese            | Siberian          | Melanesian          | 260.66 | 1 | 1 |
| Southeast Asian     | Arabian           | Pygmy               | 260.90 | 1 | 1 |
| Pygmy               | Omotc             | Indian              | 261.34 | 1 | 1 |

|                     |                     |                     |        |   |   |
|---------------------|---------------------|---------------------|--------|---|---|
| Khoisan             | Nilo-Saharan        | Berber              | 262.22 | 1 | 1 |
| Indian              | Kalash              | Melanesian          | 262.26 | 1 | 1 |
| Cushitic            | Northern European   | Pygmy               | 262.58 | 1 | 1 |
| Southeast Asian     | Native American     | Levantine-Caucasian | 263.18 | 1 | 1 |
| Melanesian          | Japanese            | Southern European   | 263.34 | 1 | 1 |
| Southeast Asian     | Arabian             | Nilo-Saharan        | 263.44 | 1 | 1 |
| Kalash              | Northern European   | Native American     | 263.53 | 1 | 1 |
| Cushitic            | Northern European   | Southeast Asian     | 263.69 | 1 | 1 |
| Melanesian          | Levantine-Caucasian | Niger-Congo         | 264.27 | 1 | 1 |
| Arabian             | Northern European   | Siberian            | 264.35 | 1 | 1 |
| Levantine-Caucasian | Nilo-Saharan        | Native American     | 264.99 | 1 | 1 |
| Cushitic            | Arabian             | Siberian            | 265.12 | 1 | 1 |
| Southeast Asian     | Kalash              | Pygmy               | 265.48 | 1 | 1 |
| Kalash              | Siberian            | Pygmy               | 265.55 | 1 | 1 |
| Melanesian          | Chinese             | Pygmy               | 265.59 | 1 | 1 |
| Levantine-Caucasian | Nilo-Saharan        | Chinese             | 265.88 | 1 | 1 |
| Cushitic            | Kalash              | Niger-Congo         | 266.01 | 1 | 1 |
| Cushitic            | Indian              | Melanesian          | 266.50 | 1 | 1 |
| Native American     | Siberian            | Cushitic            | 266.61 | 1 | 1 |
| Melanesian          | Siberian            | Nilo-Saharan        | 266.91 | 1 | 1 |
| Southern European   | Native American     | Pygmy               | 266.99 | 1 | 1 |
| Chinese             | Indian              | Southern European   | 267.04 | 1 | 1 |
| Levantine-Caucasian | Kalash              | Southeast Asian     | 267.27 | 1 | 1 |
| Southeast Asian     | Siberian            | Omotc               | 267.47 | 1 | 1 |
| Berber              | Indian              | Chinese             | 267.53 | 1 | 1 |
| Southern European   | Niger-Congo         | Chinese             | 267.82 | 1 | 1 |
| Khoisan             | Omotc               | Indian              | 267.87 | 1 | 1 |
| Melanesian          | Southern European   | Khoisan             | 267.97 | 1 | 1 |
| Niger-Congo         | Cushitic            | Levantine-Caucasian | 268.18 | 1 | 1 |
| Japanese            | Arabian             | Pygmy               | 268.68 | 1 | 1 |
| Japanese            | Native American     | Northern European   | 268.79 | 1 | 1 |
| Berber              | Cushitic            | Pygmy               | 268.82 | 1 | 1 |
| Pygmy               | Cushitic            | Melanesian          | 268.87 | 1 | 1 |
| Kalash              | Arabian             | Melanesian          | 268.87 | 1 | 1 |
| Berber              | Omotc               | Native American     | 269.21 | 1 | 1 |
| Arabian             | Siberian            | Nilo-Saharan        | 269.61 | 1 | 1 |
| Southeast Asian     | Japanese            | Melanesian          | 269.90 | 1 | 1 |
| Southern European   | Kalash              | Native American     | 270.26 | 1 | 1 |
| Niger-Congo         | Indian              | Melanesian          | 270.46 | 1 | 1 |
| Cushitic            | Indian              | Niger-Congo         | 271.11 | 1 | 1 |
| Levantine-Caucasian | Native American     | Pygmy               | 271.16 | 1 | 1 |
| Indian              | Kalash              | Chinese             | 271.20 | 1 | 1 |
| Japanese            | Arabian             | Nilo-Saharan        | 271.26 | 1 | 1 |
| Melanesian          | Kalash              | Khoisan             | 271.29 | 1 | 1 |
| Berber              | Cushitic            | Siberian            | 271.61 | 1 | 1 |
| Niger-Congo         | Arabian             | Native American     | 271.68 | 1 | 1 |
| Southeast Asian     | Chinese             | Kalash              | 272.00 | 1 | 1 |
| Chinese             | Siberian            | Melanesian          | 272.30 | 1 | 1 |
| Japanese            | Kalash              | Pygmy               | 272.41 | 1 | 1 |
| Niger-Congo         | Omotc               | Kalash              | 272.66 | 1 | 1 |
| Berber              | Kalash              | Pygmy               | 272.84 | 1 | 1 |

|                     |                     |                     |        |   |   |
|---------------------|---------------------|---------------------|--------|---|---|
| Nilo-Saharan        | Omotc               | Kalash              | 272.85 | 1 | 1 |
| Niger-Congo         | Arabian             | Chinese             | 273.06 | 1 | 1 |
| Levantine-Caucasian | Cushitic            | Nilo-Saharan        | 274.39 | 1 | 1 |
| Khoisan             | Pygmy               | Cushitic            | 274.55 | 1 | 1 |
| Southern European   | Arabian             | Omotc               | 274.71 | 1 | 1 |
| Japanese            | Native American     | Arabian             | 274.75 | 1 | 1 |
| Berber              | Indian              | Melanesian          | 274.95 | 1 | 1 |
| Pygmy               | Nilo-Saharan        | Berber              | 275.23 | 1 | 1 |
| Melanesian          | Levantine-Caucasian | Khoisan             | 275.49 | 1 | 1 |
| Cushitic            | Siberian            | Khoisan             | 275.70 | 1 | 1 |
| Nilo-Saharan        | Arabian             | Melanesian          | 275.82 | 1 | 1 |
| Southern European   | Siberian            | Pygmy               | 276.25 | 1 | 1 |
| Chinese             | Native American     | Northern European   | 276.91 | 1 | 1 |
| Melanesian          | Kalash              | Niger-Congo         | 277.23 | 1 | 1 |
| Cushitic            | Omotc               | Southeast Asian     | 277.32 | 1 | 1 |
| Niger-Congo         | Nilo-Saharan        | Cushitic            | 277.60 | 1 | 1 |
| Southern European   | Niger-Congo         | Native American     | 278.16 | 1 | 1 |
| Indian              | Arabian             | Native American     | 278.33 | 1 | 1 |
| Levantine-Caucasian | Siberian            | Pygmy               | 278.40 | 1 | 1 |
| Melanesian          | Chinese             | Southern European   | 278.59 | 1 | 1 |
| Indian              | Northern European   | Native American     | 278.91 | 1 | 1 |
| Native American     | Siberian            | Levantine-Caucasian | 279.09 | 1 | 1 |
| Southern European   | Southeast Asian     | Pygmy               | 279.26 | 1 | 1 |
| Southeast Asian     | Chinese             | Indian              | 279.69 | 1 | 1 |
| Japanese            | Native American     | Cushitic            | 279.83 | 1 | 1 |
| Chinese             | Native American     | Arabian             | 279.89 | 1 | 1 |
| Southern European   | Native American     | Nilo-Saharan        | 280.15 | 1 | 1 |
| Berber              | Omotc               | Chinese             | 280.46 | 1 | 1 |
| Cushitic            | Omotc               | Japanese            | 280.54 | 1 | 1 |
| Berber              | Indian              | Nilo-Saharan        | 280.83 | 1 | 1 |
| Nilo-Saharan        | Cushitic            | Siberian            | 280.87 | 1 | 1 |
| Levantine-Caucasian | Cushitic            | Pygmy               | 280.95 | 1 | 1 |
| Southeast Asian     | Levantine-Caucasian | Pygmy               | 280.97 | 1 | 1 |
| Berber              | Indian              | Pygmy               | 281.25 | 1 | 1 |
| Chinese             | Arabian             | Pygmy               | 281.53 | 1 | 1 |
| Berber              | Native American     | Niger-Congo         | 281.62 | 1 | 1 |
| Levantine-Caucasian | Niger-Congo         | Native American     | 281.65 | 1 | 1 |
| Melanesian          | Northern European   | Niger-Congo         | 281.65 | 1 | 1 |
| Berber              | Kalash              | Nilo-Saharan        | 281.95 | 1 | 1 |
| Chinese             | Kalash              | Pygmy               | 282.06 | 1 | 1 |
| Levantine-Caucasian | Kalash              | Native American     | 282.20 | 1 | 1 |
| Berber              | Arabian             | Siberian            | 282.52 | 1 | 1 |
| Kalash              | Native American     | Nilo-Saharan        | 282.77 | 1 | 1 |
| Berber              | Levantine-Caucasian | Siberian            | 282.80 | 1 | 1 |
| Southeast Asian     | Kalash              | Nilo-Saharan        | 282.88 | 1 | 1 |
| Levantine-Caucasian | Niger-Congo         | Chinese             | 283.04 | 1 | 1 |
| Southern European   | Southeast Asian     | Nilo-Saharan        | 283.27 | 1 | 1 |
| Chinese             | Arabian             | Nilo-Saharan        | 283.42 | 1 | 1 |
| Southeast Asian     | Chinese             | Native American     | 283.43 | 1 | 1 |
| Southern European   | Cushitic            | Nilo-Saharan        | 283.51 | 1 | 1 |
| Khoisan             | Cushitic            | Melanesian          | 283.79 | 1 | 1 |



|                     |                     |                   |        |   |   |
|---------------------|---------------------|-------------------|--------|---|---|
| Southeast Asian     | Cushitic            | Khoisan           | 284.24 | 1 | 1 |
| Melanesian          | Northern European   | Khoisan           | 284.31 | 1 | 1 |
| Pygmy               | Omotc               | Siberian          | 284.82 | 1 | 1 |
| Chinese             | Native American     | Cushitic          | 285.32 | 1 | 1 |
| Levantine-Caucasian | Native American     | Nilo-Saharan      | 285.75 | 1 | 1 |
| Pygmy               | Omotc               | Arabian           | 286.33 | 1 | 1 |
| Cushitic            | Arabian             | Pygmy             | 286.56 | 1 | 1 |
| Southern European   | Cushitic            | Pygmy             | 286.69 | 1 | 1 |
| Kalash              | Siberian            | Nilo-Saharan      | 287.02 | 1 | 1 |
| Southeast Asian     | Levantine-Caucasian | Nilo-Saharan      | 287.13 | 1 | 1 |
| Southern European   | Japanese            | Pygmy             | 287.24 | 1 | 1 |
| Levantine-Caucasian | Japanese            | Pygmy             | 287.78 | 1 | 1 |
| Southern European   | Kalash              | Melanesian        | 287.85 | 1 | 1 |
| Indian              | Native American     | Pygmy             | 288.08 | 1 | 1 |
| Southeast Asian     | Berber              | Niger-Congo       | 288.10 | 1 | 1 |
| Cushitic            | Arabian             | Nilo-Saharan      | 288.73 | 1 | 1 |
| Japanese            | Cushitic            | Khoisan           | 288.86 | 1 | 1 |
| Southern European   | Levantine-Caucasian | Omotc             | 288.89 | 1 | 1 |
| Melanesian          | Southeast Asian     | Nilo-Saharan      | 289.64 | 1 | 1 |
| Southern European   | Indian              | Native American   | 290.26 | 1 | 1 |
| Nilo-Saharan        | Northern European   | Melanesian        | 290.41 | 1 | 1 |
| Levantine-Caucasian | Siberian            | Nilo-Saharan      | 290.54 | 1 | 1 |
| Southern European   | Siberian            | Nilo-Saharan      | 290.67 | 1 | 1 |
| Kalash              | Arabian             | Chinese           | 290.78 | 1 | 1 |
| Berber              | Siberian            | Niger-Congo       | 291.52 | 1 | 1 |
| Japanese            | Kalash              | Nilo-Saharan      | 291.53 | 1 | 1 |
| Southern European   | Japanese            | Nilo-Saharan      | 291.91 | 1 | 1 |
| Niger-Congo         | Omotc               | Indian            | 292.36 | 1 | 1 |
| Berber              | Nilo-Saharan        | Native American   | 292.65 | 1 | 1 |
| Berber              | Nilo-Saharan        | Melanesian        | 292.66 | 1 | 1 |
| Pygmy               | Cushitic            | Native American   | 292.98 | 1 | 1 |
| Niger-Congo         | Cushitic            | Siberian          | 292.99 | 1 | 1 |
| Levantine-Caucasian | Northern European   | Omotc             | 293.30 | 1 | 1 |
| Khoisan             | Omotc               | Arabian           | 294.03 | 1 | 1 |
| Southern European   | Nilo-Saharan        | Melanesian        | 294.15 | 1 | 1 |
| Melanesian          | Japanese            | Nilo-Saharan      | 294.29 | 1 | 1 |
| Nilo-Saharan        | Cushitic            | Southern European | 294.38 | 1 | 1 |
| Kalash              | Northern European   | Melanesian        | 294.81 | 1 | 1 |
| Khoisan             | Omotc               | Siberian          | 295.00 | 1 | 1 |
| Levantine-Caucasian | Japanese            | Nilo-Saharan      | 295.28 | 1 | 1 |
| Southeast Asian     | Siberian            | Cushitic          | 295.82 | 1 | 1 |
| Nilo-Saharan        | Omotc               | Indian            | 295.92 | 1 | 1 |
| Cushitic            | Northern European   | Native American   | 296.03 | 1 | 1 |
| Nilo-Saharan        | Cushitic            | Northern European | 296.74 | 1 | 1 |
| Indian              | Arabian             | Chinese           | 296.87 | 1 | 1 |
| Southeast Asian     | Northern European   | Pygmy             | 297.08 | 1 | 1 |
| Levantine-Caucasian | Nilo-Saharan        | Melanesian        | 297.15 | 1 | 1 |
| Khoisan             | Niger-Congo         | Berber            | 297.26 | 1 | 1 |
| Berber              | Japanese            | Niger-Congo       | 297.32 | 1 | 1 |
| Khoisan             | Nilo-Saharan        | Kalash            | 297.80 | 1 | 1 |
| Levantine-Caucasian | Kalash              | Melanesian        | 297.86 | 1 | 1 |

|                     |                   |                     |        |   |   |
|---------------------|-------------------|---------------------|--------|---|---|
| Indian              | Arabian           | Melanesian          | 298.46 | 1 | 1 |
| Niger-Congo         | Nilo-Saharan      | Khoisan             | 298.92 | 1 | 1 |
| Cushitic            | Chinese           | Khoisan             | 299.56 | 1 | 1 |
| Levantine-Caucasian | Arabian           | Siberian            | 299.98 | 1 | 1 |
| Southeast Asian     | Siberian          | Arabian             | 300.01 | 1 | 1 |
| Levantine-Caucasian | Cushitic          | Japanese            | 300.47 | 1 | 1 |
| Levantine-Caucasian | Indian            | Native American     | 301.02 | 1 | 1 |
| Northern European   | Siberian          | Pygmy               | 301.32 | 1 | 1 |
| Southeast Asian     | Chinese           | Melanesian          | 301.50 | 1 | 1 |
| Japanese            | Native American   | Levantine-Caucasian | 301.67 | 1 | 1 |
| Chinese             | Kalash            | Nilo-Saharan        | 301.69 | 1 | 1 |
| Indian              | Siberian          | Pygmy               | 302.06 | 1 | 1 |
| Levantine-Caucasian | Cushitic          | Southeast Asian     | 302.53 | 1 | 1 |
| Native American     | Northern European | Pygmy               | 302.95 | 1 | 1 |
| Cushitic            | Omotc             | Melanesian          | 303.17 | 1 | 1 |
| Khoisan             | Cushitic          | Native American     | 303.19 | 1 | 1 |
| Southeast Asian     | Native American   | Southern European   | 303.48 | 1 | 1 |
| Southern European   | Cushitic          | Japanese            | 303.63 | 1 | 1 |
| Pygmy               | Nilo-Saharan      | Kalash              | 303.85 | 1 | 1 |
| Niger-Congo         | Cushitic          | Southern European   | 303.94 | 1 | 1 |
| Southern European   | Berber            | Siberian            | 305.11 | 1 | 1 |
| Niger-Congo         | Arabian           | Melanesian          | 305.44 | 1 | 1 |
| Levantine-Caucasian | Northern European | Siberian            | 305.79 | 1 | 1 |
| Southern European   | Chinese           | Pygmy               | 305.92 | 1 | 1 |
| Melanesian          | Chinese           | Nilo-Saharan        | 305.93 | 1 | 1 |
| Southern European   | Cushitic          | Southeast Asian     | 306.02 | 1 | 1 |
| Levantine-Caucasian | Chinese           | Pygmy               | 306.51 | 1 | 1 |
| Niger-Congo         | Cushitic          | Northern European   | 306.64 | 1 | 1 |
| Berber              | Nilo-Saharan      | Chinese             | 306.78 | 1 | 1 |
| Japanese            | Northern European | Pygmy               | 307.83 | 1 | 1 |
| Japanese            | Chinese           | Native American     | 307.85 | 1 | 1 |
| Melanesian          | Indian            | Khoisan             | 307.92 | 1 | 1 |
| Pygmy               | Omotc             | Melanesian          | 308.19 | 1 | 1 |
| Southern European   | Northern European | Omotc               | 308.65 | 1 | 1 |
| Japanese            | Chinese           | Kalash              | 308.73 | 1 | 1 |
| Japanese            | Siberian          | Omotc               | 308.73 | 1 | 1 |
| Berber              | Chinese           | Niger-Congo         | 308.93 | 1 | 1 |
| Southern European   | Chinese           | Nilo-Saharan        | 309.18 | 1 | 1 |
| Japanese            | Siberian          | Berber              | 310.14 | 1 | 1 |
| Melanesian          | Native American   | Khoisan             | 310.18 | 1 | 1 |
| Cushitic            | Kalash            | Khoisan             | 310.47 | 1 | 1 |
| Levantine-Caucasian | Chinese           | Nilo-Saharan        | 310.69 | 1 | 1 |
| Southeast Asian     | Northern European | Nilo-Saharan        | 310.82 | 1 | 1 |
| Niger-Congo         | Pygmy             | Berber              | 310.89 | 1 | 1 |
| Kalash              | Arabian           | Pygmy               | 311.08 | 1 | 1 |
| Cushitic            | Arabian           | Japanese            | 311.23 | 1 | 1 |
| Indian              | Native American   | Nilo-Saharan        | 312.08 | 1 | 1 |
| Cushitic            | Arabian           | Southeast Asian     | 312.20 | 1 | 1 |
| Berber              | Cushitic          | Japanese            | 312.70 | 1 | 1 |
| Southern European   | Arabian           | Siberian            | 313.42 | 1 | 1 |
| Chinese             | Native American   | Levantine-Caucasian | 313.69 | 1 | 1 |

|                     |                     |                     |        |   |   |
|---------------------|---------------------|---------------------|--------|---|---|
| Pygmy               | Cushitic            | Chinese             | 313.73 | 1 | 1 |
| Berber              | Niger-Congo         | Native American     | 313.80 | 1 | 1 |
| Southern European   | Kalash              | Chinese             | 313.84 | 1 | 1 |
| Southeast Asian     | Siberian            | Northern European   | 314.76 | 1 | 1 |
| Southern European   | Indian              | Chinese             | 314.92 | 1 | 1 |
| Melanesian          | Indian              | Niger-Congo         | 315.17 | 1 | 1 |
| Berber              | Northern European   | Japanese            | 315.29 | 1 | 1 |
| Chinese             | Siberian            | OmotiC              | 315.30 | 1 | 1 |
| Nilo-Saharan        | Cushitic            | Southeast Asian     | 315.34 | 1 | 1 |
| Berber              | Cushitic            | Southeast Asian     | 315.65 | 1 | 1 |
| Native American     | Siberian            | Southern European   | 316.14 | 1 | 1 |
| Southeast Asian     | Native American     | Pygmy               | 316.18 | 1 | 1 |
| Pygmy               | OmotiC              | Southeast Asian     | 316.38 | 1 | 1 |
| Chinese             | Siberian            | Berber              | 316.61 | 1 | 1 |
| Cushitic            | OmotiC              | Native American     | 316.66 | 1 | 1 |
| Southeast Asian     | Japanese            | OmotiC              | 317.78 | 1 | 1 |
| Indian              | Northern European   | Chinese             | 317.81 | 1 | 1 |
| Southeast Asian     | Indian              | Pygmy               | 318.23 | 1 | 1 |
| Melanesian          | Siberian            | Khoisan             | 318.29 | 1 | 1 |
| Nilo-Saharan        | Cushitic            | Japanese            | 318.46 | 1 | 1 |
| Pygmy               | OmotiC              | Japanese            | 318.70 | 1 | 1 |
| Berber              | Native American     | Khoisan             | 318.95 | 1 | 1 |
| Kalash              | Northern European   | Chinese             | 319.93 | 1 | 1 |
| Nilo-Saharan        | OmotiC              | Arabian             | 321.56 | 1 | 1 |
| Southern European   | Indian              | Melanesian          | 321.65 | 1 | 1 |
| Berber              | Northern European   | Southeast Asian     | 322.33 | 1 | 1 |
| Berber              | Niger-Congo         | Melanesian          | 322.43 | 1 | 1 |
| Japanese            | Indian              | Pygmy               | 322.49 | 1 | 1 |
| Southern European   | Northern European   | Siberian            | 322.61 | 1 | 1 |
| Niger-Congo         | OmotiC              | Arabian             | 323.57 | 1 | 1 |
| Indian              | Kalash              | Pygmy               | 323.81 | 1 | 1 |
| Indian              | Arabian             | Pygmy               | 323.88 | 1 | 1 |
| Japanese            | Northern European   | Nilo-Saharan        | 324.17 | 1 | 1 |
| Berber              | Cushitic            | Niger-Congo         | 324.41 | 1 | 1 |
| Southern European   | Levantine-Caucasian | Siberian            | 324.80 | 1 | 1 |
| Northern European   | Siberian            | Nilo-Saharan        | 325.26 | 1 | 1 |
| Pygmy               | OmotiC              | Levantine-Caucasian | 325.35 | 1 | 1 |
| Khoisan             | OmotiC              | Melanesian          | 325.61 | 1 | 1 |
| Southeast Asian     | Japanese            | Berber              | 326.06 | 1 | 1 |
| Nilo-Saharan        | OmotiC              | Siberian            | 327.51 | 1 | 1 |
| Native American     | Siberian            | Pygmy               | 327.55 | 1 | 1 |
| Indian              | Siberian            | Nilo-Saharan        | 328.07 | 1 | 1 |
| Arabian             | Northern European   | Japanese            | 328.11 | 1 | 1 |
| Indian              | Northern European   | Melanesian          | 328.25 | 1 | 1 |
| Levantine-Caucasian | Indian              | Melanesian          | 329.15 | 1 | 1 |
| Khoisan             | OmotiC              | Southeast Asian     | 329.57 | 1 | 1 |
| Niger-Congo         | OmotiC              | Siberian            | 329.66 | 1 | 1 |
| Khoisan             | Pygmy               | Berber              | 329.71 | 1 | 1 |
| Chinese             | Northern European   | Pygmy               | 329.82 | 1 | 1 |
| Cushitic            | Northern European   | Niger-Congo         | 329.88 | 1 | 1 |
| Levantine-Caucasian | Indian              | Chinese             | 330.65 | 1 | 1 |

|                     |                     |                     |        |   |   |
|---------------------|---------------------|---------------------|--------|---|---|
| Cushitic            | Northern European   | Melanesian          | 330.67 | 1 | 1 |
| Khoisan             | Cushitic            | Chinese             | 330.78 | 1 | 1 |
| Khoisan             | Nilo-Saharan        | Indian              | 331.50 | 1 | 1 |
| Khoisan             | OmotiC              | Japanese            | 331.83 | 1 | 1 |
| Niger-Congo         | Cushitic            | Southeast Asian     | 332.10 | 1 | 1 |
| Berber              | Niger-Congo         | Chinese             | 332.12 | 1 | 1 |
| Native American     | Northern European   | Nilo-Saharan        | 332.26 | 1 | 1 |
| Southern European   | Kalash              | Pygmy               | 332.44 | 1 | 1 |
| Berber              | Arabian             | Japanese            | 332.66 | 1 | 1 |
| Levantine-Caucasian | Kalash              | Chinese             | 332.67 | 1 | 1 |
| Berber              | Cushitic            | Melanesian          | 332.80 | 1 | 1 |
| Berber              | Siberian            | Khoisan             | 332.87 | 1 | 1 |
| Japanese            | Chinese             | Indian              | 332.93 | 1 | 1 |
| Japanese            | Chinese             | Melanesian          | 333.30 | 1 | 1 |
| Niger-Congo         | Cushitic            | Japanese            | 333.77 | 1 | 1 |
| Niger-Congo         | Northern European   | Melanesian          | 334.26 | 1 | 1 |
| Melanesian          | Native American     | Niger-Congo         | 334.60 | 1 | 1 |
| Kalash              | Arabian             | Nilo-Saharan        | 335.41 | 1 | 1 |
| Southeast Asian     | Siberian            | Levantine-Caucasian | 335.69 | 1 | 1 |
| Pygmy               | Nilo-Saharan        | Indian              | 335.69 | 1 | 1 |
| Berber              | Northern European   | Native American     | 336.27 | 1 | 1 |
| Arabian             | Northern European   | Southeast Asian     | 336.66 | 1 | 1 |
| Berber              | Levantine-Caucasian | Japanese            | 336.69 | 1 | 1 |
| Cushitic            | Indian              | Khoisan             | 336.90 | 1 | 1 |
| Khoisan             | Niger-Congo         | Kalash              | 337.08 | 1 | 1 |
| Berber              | Arabian             | Southeast Asian     | 337.50 | 1 | 1 |
| Khoisan             | Pygmy               | Kalash              | 338.16 | 1 | 1 |
| Niger-Congo         | Pygmy               | Kalash              | 338.31 | 1 | 1 |
| Chinese             | Indian              | Pygmy               | 338.46 | 1 | 1 |
| Southeast Asian     | Berber              | Khoisan             | 338.55 | 1 | 1 |
| Levantine-Caucasian | Cushitic            | Native American     | 338.84 | 1 | 1 |
| Cushitic            | Northern European   | Chinese             | 338.87 | 1 | 1 |
| Levantine-Caucasian | Niger-Congo         | Melanesian          | 340.33 | 1 | 1 |
| Khoisan             | OmotiC              | Levantine-Caucasian | 340.34 | 1 | 1 |
| Cushitic            | OmotiC              | Chinese             | 341.31 | 1 | 1 |
| Cushitic            | Arabian             | Melanesian          | 341.44 | 1 | 1 |
| Southern European   | Niger-Congo         | Melanesian          | 341.64 | 1 | 1 |
| Indian              | Arabian             | Nilo-Saharan        | 342.37 | 1 | 1 |
| Berber              | Levantine-Caucasian | Southeast Asian     | 342.42 | 1 | 1 |
| Japanese            | Native American     | Pygmy               | 342.47 | 1 | 1 |
| Pygmy               | OmotiC              | Native American     | 342.48 | 1 | 1 |
| Arabian             | Native American     | Niger-Congo         | 342.95 | 1 | 1 |
| Melanesian          | Siberian            | Niger-Congo         | 343.32 | 1 | 1 |
| Kalash              | Northern European   | Pygmy               | 343.55 | 1 | 1 |
| Chinese             | Northern European   | Nilo-Saharan        | 343.67 | 1 | 1 |
| Southeast Asian     | Chinese             | OmotiC              | 343.76 | 1 | 1 |
| Melanesian          | Southeast Asian     | Khoisan             | 344.13 | 1 | 1 |
| Nilo-Saharan        | Cushitic            | Melanesian          | 344.22 | 1 | 1 |
| Japanese            | Native American     | Southern European   | 344.36 | 1 | 1 |
| Southern European   | Cushitic            | Native American     | 344.40 | 1 | 1 |
| Southeast Asian     | Indian              | Nilo-Saharan        | 344.79 | 1 | 1 |

|                     |                     |                   |        |   |   |
|---------------------|---------------------|-------------------|--------|---|---|
| Levantine-Caucasian | Kalash              | Pygmy             | 344.82 | 1 | 1 |
| Pygmy               | Omotc               | Northern European | 344.87 | 1 | 1 |
| Berber              | Cushitic            | Native American   | 345.30 | 1 | 1 |
| Cushitic            | Arabian             | Native American   | 346.48 | 1 | 1 |
| Japanese            | Siberian            | Cushitic          | 346.69 | 1 | 1 |
| Berber              | Arabian             | Pygmy             | 347.45 | 1 | 1 |
| Berber              | Japanese            | Khoisan           | 347.45 | 1 | 1 |
| Niger-Congo         | Nilo-Saharan        | Berber            | 348.51 | 1 | 1 |
| Southern European   | Indian              | Pygmy             | 348.51 | 1 | 1 |
| Japanese            | Indian              | Nilo-Saharan      | 349.12 | 1 | 1 |
| Arabian             | Northern European   | Native American   | 349.38 | 1 | 1 |
| Melanesian          | Japanese            | Khoisan           | 349.47 | 1 | 1 |
| Levantine-Caucasian | Cushitic            | Melanesian        | 349.74 | 1 | 1 |
| Berber              | Kalash              | Niger-Congo       | 350.71 | 1 | 1 |
| Southeast Asian     | Arabian             | Niger-Congo       | 351.53 | 1 | 1 |
| Berber              | Northern European   | Pygmy             | 351.63 | 1 | 1 |
| Pygmy               | Nilo-Saharan        | Siberian          | 352.13 | 1 | 1 |
| Berber              | Arabian             | Melanesian        | 352.55 | 1 | 1 |
| Arabian             | Siberian            | Niger-Congo       | 353.03 | 1 | 1 |
| Southern European   | Cushitic            | Melanesian        | 354.78 | 1 | 1 |
| Berber              | Indian              | Niger-Congo       | 354.91 | 1 | 1 |
| Indian              | Kalash              | Nilo-Saharan      | 355.28 | 1 | 1 |
| Berber              | Levantine-Caucasian | Pygmy             | 355.50 | 1 | 1 |
| Khoisan             | Nilo-Saharan        | Siberian          | 355.70 | 1 | 1 |
| Southeast Asian     | Siberian            | Pygmy             | 355.91 | 1 | 1 |
| Japanese            | Siberian            | Arabian           | 355.93 | 1 | 1 |
| Levantine-Caucasian | Indian              | Pygmy             | 356.28 | 1 | 1 |
| Chinese             | Native American     | Pygmy             | 356.37 | 1 | 1 |
| Chinese             | Siberian            | Cushitic          | 357.37 | 1 | 1 |
| Pygmy               | Omotc               | Southern European | 357.92 | 1 | 1 |
| Berber              | Arabian             | Native American   | 357.98 | 1 | 1 |
| Arabian             | Native American     | Khoisan           | 358.23 | 1 | 1 |
| Levantine-Caucasian | Cushitic            | Niger-Congo       | 358.75 | 1 | 1 |
| Kalash              | Native American     | Khoisan           | 359.14 | 1 | 1 |
| Southeast Asian     | Chinese             | Berber            | 359.24 | 1 | 1 |
| Khoisan             | Omotc               | Native American   | 360.82 | 1 | 1 |
| Chinese             | Native American     | Southern European | 360.94 | 1 | 1 |
| Berber              | Northern European   | Melanesian        | 361.13 | 1 | 1 |
| Khoisan             | Omotc               | Northern European | 361.42 | 1 | 1 |
| Southeast Asian     | Japanese            | Cushitic          | 361.61 | 1 | 1 |
| Indian              | Northern European   | Pygmy             | 361.64 | 1 | 1 |
| Levantine-Caucasian | Arabian             | Japanese          | 362.18 | 1 | 1 |
| Nilo-Saharan        | Omotc               | Melanesian        | 362.25 | 1 | 1 |
| Nilo-Saharan        | Omotc               | Southeast Asian   | 362.38 | 1 | 1 |
| Southeast Asian     | Native American     | Nilo-Saharan      | 362.53 | 1 | 1 |
| Berber              | Levantine-Caucasian | Native American   | 362.56 | 1 | 1 |
| Kalash              | Siberian            | Niger-Congo       | 362.72 | 1 | 1 |
| Kalash              | Native American     | Niger-Congo       | 362.82 | 1 | 1 |
| Japanese            | Arabian             | Niger-Congo       | 362.97 | 1 | 1 |
| Southern European   | Berber              | Japanese          | 364.17 | 1 | 1 |
| Nilo-Saharan        | Cushitic            | Native American   | 364.33 | 1 | 1 |

|                     |                     |                     |        |   |   |
|---------------------|---------------------|---------------------|--------|---|---|
| Kalash              | Siberian            | Khoisan             | 364.84 | 1 | 1 |
| Southeast Asian     | Kalash              | Niger-Congo         | 365.22 | 1 | 1 |
| Berber              | Chinese             | Khoisan             | 365.75 | 1 | 1 |
| Chinese             | Indian              | Nilo-Saharan        | 365.87 | 1 | 1 |
| Southern European   | Kalash              | Nilo-Saharan        | 365.90 | 1 | 1 |
| Melanesian          | Chinese             | Khoisan             | 366.19 | 1 | 1 |
| Levantine-Caucasian | Arabian             | Southeast Asian     | 366.46 | 1 | 1 |
| Chinese             | Siberian            | Arabian             | 367.44 | 1 | 1 |
| Niger-Congo         | OmotiC              | Southeast Asian     | 368.11 | 1 | 1 |
| Berber              | Levantine-Caucasian | Melanesian          | 368.30 | 1 | 1 |
| Southern European   | Berber              | Southeast Asian     | 369.48 | 1 | 1 |
| Arabian             | Siberian            | Khoisan             | 369.74 | 1 | 1 |
| Niger-Congo         | OmotiC              | Japanese            | 369.83 | 1 | 1 |
| Southeast Asian     | Kalash              | Khoisan             | 370.15 | 1 | 1 |
| Berber              | Arabian             | Nilo-Saharan        | 370.72 | 1 | 1 |
| Southern European   | Cushitic            | Niger-Congo         | 371.23 | 1 | 1 |
| Southeast Asian     | Siberian            | Southern European   | 371.29 | 1 | 1 |
| Southern European   | Indian              | Nilo-Saharan        | 371.77 | 1 | 1 |
| Cushitic            | Arabian             | Niger-Congo         | 372.41 | 1 | 1 |
| Berber              | Northern European   | Nilo-Saharan        | 374.40 | 1 | 1 |
| Niger-Congo         | Cushitic            | Melanesian          | 374.44 | 1 | 1 |
| Japanese            | Kalash              | Niger-Congo         | 374.59 | 1 | 1 |
| Niger-Congo         | OmotiC              | Levantine-Caucasian | 374.59 | 1 | 1 |
| Khoisan             | Nilo-Saharan        | Arabian             | 374.72 | 1 | 1 |
| Berber              | Kalash              | Khoisan             | 375.44 | 1 | 1 |
| Khoisan             | OmotiC              | Southern European   | 376.31 | 1 | 1 |
| Melanesian          | Southeast Asian     | Niger-Congo         | 376.33 | 1 | 1 |
| Southern European   | Native American     | Niger-Congo         | 376.68 | 1 | 1 |
| Southeast Asian     | Arabian             | Khoisan             | 377.00 | 1 | 1 |
| Niger-Congo         | OmotiC              | Melanesian          | 377.57 | 1 | 1 |
| Pygmy               | Nilo-Saharan        | Arabian             | 377.82 | 1 | 1 |
| Southern European   | Berber              | Pygmy               | 378.16 | 1 | 1 |
| Native American     | Siberian            | Nilo-Saharan        | 378.20 | 1 | 1 |
| Khoisan             | Niger-Congo         | Indian              | 378.38 | 1 | 1 |
| Japanese            | Siberian            | Northern European   | 378.71 | 1 | 1 |
| Berber              | Levantine-Caucasian | Nilo-Saharan        | 378.79 | 1 | 1 |
| Niger-Congo         | Pygmy               | Indian              | 379.69 | 1 | 1 |
| Japanese            | Kalash              | Khoisan             | 379.81 | 1 | 1 |
| Levantine-Caucasian | Northern European   | Japanese            | 380.98 | 1 | 1 |
| Nilo-Saharan        | OmotiC              | Japanese            | 381.15 | 1 | 1 |
| Levantine-Caucasian | Kalash              | Nilo-Saharan        | 381.51 | 1 | 1 |
| Southern European   | Arabian             | Japanese            | 381.67 | 1 | 1 |
| Melanesian          | Japanese            | Niger-Congo         | 381.79 | 1 | 1 |
| Pygmy               | OmotiC              | Chinese             | 381.89 | 1 | 1 |
| Berber              | Cushitic            | Khoisan             | 382.43 | 1 | 1 |
| Southeast Asian     | Japanese            | Arabian             | 382.50 | 1 | 1 |
| Levantine-Caucasian | Native American     | Niger-Congo         | 382.52 | 1 | 1 |
| Levantine-Caucasian | Siberian            | Niger-Congo         | 383.35 | 1 | 1 |
| Pygmy               | Nilo-Saharan        | Melanesian          | 383.59 | 1 | 1 |
| Kalash              | Northern European   | Nilo-Saharan        | 383.61 | 1 | 1 |
| Southern European   | Southeast Asian     | Niger-Congo         | 383.99 | 1 | 1 |

|                     |                     |                     |        |   |   |
|---------------------|---------------------|---------------------|--------|---|---|
| Levantine-Caucasian | Indian              | Nilo-Saharan        | 384.03 | 1 | 1 |
| Cushitic            | Northern European   | Khoisan             | 384.47 | 1 | 1 |
| Southern European   | Siberian            | Niger-Congo         | 384.69 | 1 | 1 |
| Niger-Congo         | Cushitic            | Native American     | 384.72 | 1 | 1 |
| Khoisan             | Pygmy               | Siberian            | 385.73 | 1 | 1 |
| Chinese             | Arabian             | Niger-Congo         | 386.00 | 1 | 1 |
| Southeast Asian     | Levantine-Caucasian | Niger-Congo         | 386.40 | 1 | 1 |
| Southern European   | Arabian             | Southeast Asian     | 386.65 | 1 | 1 |
| Levantine-Caucasian | Cushitic            | Chinese             | 386.71 | 1 | 1 |
| Southern European   | Native American     | Khoisan             | 386.94 | 1 | 1 |
| Southern European   | Berber              | Melanesian          | 387.26 | 1 | 1 |
| Southern European   | Berber              | Native American     | 387.32 | 1 | 1 |
| Levantine-Caucasian | Arabian             | Native American     | 387.48 | 1 | 1 |
| Levantine-Caucasian | Northern European   | Southeast Asian     | 387.69 | 1 | 1 |
| Khoisan             | Pygmy               | Indian              | 387.71 | 1 | 1 |
| Japanese            | Arabian             | Khoisan             | 388.52 | 1 | 1 |
| Arabian             | Northern European   | Melanesian          | 388.98 | 1 | 1 |
| Nilo-Saharan        | Omotiic             | Levantine-Caucasian | 389.06 | 1 | 1 |
| Berber              | Cushitic            | Chinese             | 389.30 | 1 | 1 |
| Japanese            | Chinese             | Omotiic             | 390.71 | 1 | 1 |
| Levantine-Caucasian | Northern European   | Native American     | 391.06 | 1 | 1 |
| Niger-Congo         | Pygmy               | Siberian            | 391.36 | 1 | 1 |
| Arabian             | Northern European   | Pygmy               | 392.55 | 1 | 1 |
| Southern European   | Cushitic            | Chinese             | 392.63 | 1 | 1 |
| Indian              | Northern European   | Nilo-Saharan        | 393.03 | 1 | 1 |
| Chinese             | Siberian            | Northern European   | 393.53 | 1 | 1 |
| Levantine-Caucasian | Native American     | Khoisan             | 393.55 | 1 | 1 |
| Cushitic            | Arabian             | Chinese             | 393.98 | 1 | 1 |
| Chinese             | Kalash              | Niger-Congo         | 394.28 | 1 | 1 |
| Southern European   | Siberian            | Khoisan             | 395.47 | 1 | 1 |
| Pygmy               | Nilo-Saharan        | Southeast Asian     | 395.67 | 1 | 1 |
| Southern European   | Japanese            | Niger-Congo         | 395.84 | 1 | 1 |
| Nilo-Saharan        | Omotiic             | Northern European   | 395.89 | 1 | 1 |
| Levantine-Caucasian | Japanese            | Niger-Congo         | 396.09 | 1 | 1 |
| Nilo-Saharan        | Omotiic             | Native American     | 396.19 | 1 | 1 |
| Japanese            | Siberian            | Pygmy               | 396.39 | 1 | 1 |
| Southeast Asian     | Chinese             | Cushitic            | 396.87 | 1 | 1 |
| Southern European   | Levantine-Caucasian | Japanese            | 396.89 | 1 | 1 |
| Niger-Congo         | Nilo-Saharan        | Kalash              | 397.77 | 1 | 1 |
| Pygmy               | Nilo-Saharan        | Japanese            | 398.10 | 1 | 1 |
| Chinese             | Kalash              | Khoisan             | 398.24 | 1 | 1 |
| Japanese            | Native American     | Nilo-Saharan        | 398.48 | 1 | 1 |
| Japanese            | Siberian            | Levantine-Caucasian | 398.53 | 1 | 1 |
| Niger-Congo         | Omotiic             | Northern European   | 398.62 | 1 | 1 |
| Nilo-Saharan        | Cushitic            | Chinese             | 398.81 | 1 | 1 |
| Khoisan             | Niger-Congo         | Siberian            | 399.45 | 1 | 1 |
| Levantine-Caucasian | Siberian            | Khoisan             | 399.82 | 1 | 1 |
| Berber              | Indian              | Khoisan             | 400.73 | 1 | 1 |
| Levantine-Caucasian | Arabian             | Pygmy               | 401.67 | 1 | 1 |
| Levantine-Caucasian | Arabian             | Melanesian          | 402.17 | 1 | 1 |
| Japanese            | Chinese             | Berber              | 402.21 | 1 | 1 |

|                     |                     |                     |        |   |   |
|---------------------|---------------------|---------------------|--------|---|---|
| Southern European   | Northern European   | Japanese            | 402.31 | 1 | 1 |
| Southern European   | Levantine-Caucasian | Southeast Asian     | 403.38 | 1 | 1 |
| Khoisan             | Pygmy               | Melanesian          | 403.43 | 1 | 1 |
| Khoisan             | Nilo-Saharan        | Melanesian          | 403.44 | 1 | 1 |
| Cushitic            | Arabian             | Khoisan             | 403.80 | 1 | 1 |
| Levantine-Caucasian | Cushitic            | Khoisan             | 404.10 | 1 | 1 |
| Melanesian          | Chinese             | Niger-Congo         | 404.16 | 1 | 1 |
| Khoisan             | Nilo-Saharan        | Southeast Asian     | 404.66 | 1 | 1 |
| Southern European   | Arabian             | Native American     | 405.03 | 1 | 1 |
| Indian              | Native American     | Niger-Congo         | 405.09 | 1 | 1 |
| Indian              | Native American     | Khoisan             | 405.21 | 1 | 1 |
| Niger-Congo         | Omotc               | Native American     | 406.13 | 1 | 1 |
| Southern European   | Southeast Asian     | Khoisan             | 406.44 | 1 | 1 |
| Berber              | Northern European   | Chinese             | 406.53 | 1 | 1 |
| Khoisan             | Omotc               | Chinese             | 406.63 | 1 | 1 |
| Southern European   | Northern European   | Southeast Asian     | 406.77 | 1 | 1 |
| Khoisan             | Nilo-Saharan        | Japanese            | 407.20 | 1 | 1 |
| Southern European   | Cushitic            | Khoisan             | 407.60 | 1 | 1 |
| Southeast Asian     | Siberian            | Nilo-Saharan        | 409.21 | 1 | 1 |
| Chinese             | Siberian            | Pygmy               | 409.91 | 1 | 1 |
| Nilo-Saharan        | Omotc               | Southern European   | 409.96 | 1 | 1 |
| Southern European   | Berber              | Nilo-Saharan        | 410.89 | 1 | 1 |
| Southeast Asian     | Levantine-Caucasian | Khoisan             | 411.46 | 1 | 1 |
| Southern European   | Northern European   | Native American     | 411.65 | 1 | 1 |
| Chinese             | Arabian             | Khoisan             | 414.02 | 1 | 1 |
| Southeast Asian     | Japanese            | Pygmy               | 414.10 | 1 | 1 |
| Niger-Congo         | Omotc               | Southern European   | 415.16 | 1 | 1 |
| Chinese             | Native American     | Nilo-Saharan        | 415.62 | 1 | 1 |
| Chinese             | Siberian            | Levantine-Caucasian | 416.31 | 1 | 1 |
| Southeast Asian     | Northern European   | Niger-Congo         | 416.62 | 1 | 1 |
| Southern European   | Arabian             | Melanesian          | 417.15 | 1 | 1 |
| Indian              | Siberian            | Niger-Congo         | 417.45 | 1 | 1 |
| Southern European   | Japanese            | Khoisan             | 418.12 | 1 | 1 |
| Indian              | Siberian            | Khoisan             | 418.24 | 1 | 1 |
| Berber              | Arabian             | Chinese             | 419.41 | 1 | 1 |
| Southern European   | Arabian             | Pygmy               | 419.54 | 1 | 1 |
| Southeast Asian     | Japanese            | Northern European   | 420.78 | 1 | 1 |
| Southern European   | Levantine-Caucasian | Native American     | 421.15 | 1 | 1 |
| Niger-Congo         | Pygmy               | Melanesian          | 422.22 | 1 | 1 |
| Pygmy               | Nilo-Saharan        | Native American     | 422.42 | 1 | 1 |
| Levantine-Caucasian | Japanese            | Khoisan             | 422.52 | 1 | 1 |
| Kalash              | Arabian             | Khoisan             | 423.01 | 1 | 1 |
| Southeast Asian     | Chinese             | Arabian             | 424.52 | 1 | 1 |
| Niger-Congo         | Cushitic            | Chinese             | 425.26 | 1 | 1 |
| Northern European   | Siberian            | Niger-Congo         | 425.54 | 1 | 1 |
| Southern European   | Chinese             | Niger-Congo         | 426.33 | 1 | 1 |
| Niger-Congo         | Pygmy               | Arabian             | 426.54 | 1 | 1 |
| Levantine-Caucasian | Chinese             | Niger-Congo         | 426.84 | 1 | 1 |
| Northern European   | Siberian            | Khoisan             | 427.15 | 1 | 1 |
| Khoisan             | Niger-Congo         | Arabian             | 427.17 | 1 | 1 |
| Khoisan             | Pygmy               | Arabian             | 427.20 | 1 | 1 |



|                     |                     |                     |        |   |   |
|---------------------|---------------------|---------------------|--------|---|---|
| Kalash              | Arabian             | Niger-Congo         | 427.28 | 1 | 1 |
| Southeast Asian     | Northern European   | Khoisan             | 431.26 | 1 | 1 |
| Berber              | Levantine-Caucasian | Chinese             | 431.31 | 1 | 1 |
| Arabian             | Northern European   | Chinese             | 431.38 | 1 | 1 |
| Southeast Asian     | Japanese            | Levantine-Caucasian | 432.73 | 1 | 1 |
| Japanese            | Northern European   | Niger-Congo         | 433.01 | 1 | 1 |
| Arabian             | Northern European   | Nilo-Saharan        | 433.08 | 1 | 1 |
| Native American     | Northern European   | Khoisan             | 434.43 | 1 | 1 |
| Japanese            | Siberian            | Southern European   | 436.18 | 1 | 1 |
| Pygmy               | Nilo-Saharan        | Levantine-Caucasian | 436.65 | 1 | 1 |
| Khoisan             | Pygmy               | Southeast Asian     | 437.19 | 1 | 1 |
| Native American     | Northern European   | Niger-Congo         | 439.29 | 1 | 1 |
| Niger-Congo         | Nilo-Saharan        | Indian              | 440.80 | 1 | 1 |
| Khoisan             | Nilo-Saharan        | Native American     | 441.02 | 1 | 1 |
| Indian              | Kalash              | Khoisan             | 441.03 | 1 | 1 |
| Khoisan             | Pygmy               | Japanese            | 441.30 | 1 | 1 |
| Levantine-Caucasian | Northern European   | Pygmy               | 441.90 | 1 | 1 |
| Niger-Congo         | Pygmy               | Southeast Asian     | 441.96 | 1 | 1 |
| Japanese            | Chinese             | Cushitic            | 442.52 | 1 | 1 |
| Indian              | Arabian             | Niger-Congo         | 442.58 | 1 | 1 |
| Southeast Asian     | Indian              | Niger-Congo         | 442.88 | 1 | 1 |
| Southeast Asian     | Indian              | Khoisan             | 443.51 | 1 | 1 |
| Niger-Congo         | Pygmy               | Japanese            | 444.64 | 1 | 1 |
| Southern European   | Levantine-Caucasian | Pygmy               | 444.79 | 1 | 1 |
| Levantine-Caucasian | Arabian             | Nilo-Saharan        | 445.19 | 1 | 1 |
| Japanese            | Northern European   | Khoisan             | 445.81 | 1 | 1 |
| Khoisan             | Nilo-Saharan        | Levantine-Caucasian | 446.04 | 1 | 1 |
| Indian              | Kalash              | Niger-Congo         | 446.45 | 1 | 1 |
| Southeast Asian     | Chinese             | Pygmy               | 449.01 | 1 | 1 |
| Levantine-Caucasian | Northern European   | Melanesian          | 449.34 | 1 | 1 |
| Japanese            | Indian              | Niger-Congo         | 449.74 | 1 | 1 |
| Khoisan             | Pygmy               | Native American     | 451.64 | 1 | 1 |
| Japanese            | Indian              | Khoisan             | 451.86 | 1 | 1 |
| Southern European   | Chinese             | Khoisan             | 453.18 | 1 | 1 |
| Indian              | Arabian             | Khoisan             | 454.91 | 1 | 1 |
| Southern European   | Kalash              | Khoisan             | 455.26 | 1 | 1 |
| Southeast Asian     | Native American     | Khoisan             | 455.59 | 1 | 1 |
| Niger-Congo         | Omotc               | Chinese             | 455.78 | 1 | 1 |
| Chinese             | Siberian            | Southern European   | 457.16 | 1 | 1 |
| Levantine-Caucasian | Chinese             | Khoisan             | 457.18 | 1 | 1 |
| Khoisan             | Niger-Congo         | Southeast Asian     | 458.35 | 1 | 1 |
| Khoisan             | Niger-Congo         | Melanesian          | 458.42 | 1 | 1 |
| Pygmy               | Nilo-Saharan        | Northern European   | 458.62 | 1 | 1 |
| Native American     | Siberian            | Khoisan             | 458.96 | 1 | 1 |
| Khoisan             | Niger-Congo         | Japanese            | 459.03 | 1 | 1 |
| Southern European   | Levantine-Caucasian | Melanesian          | 459.99 | 1 | 1 |
| Southern European   | Northern European   | Pygmy               | 460.52 | 1 | 1 |
| Nilo-Saharan        | Omotc               | Chinese             | 462.90 | 1 | 1 |
| Japanese            | Siberian            | Nilo-Saharan        | 465.29 | 1 | 1 |
| Southern European   | Berber              | Chinese             | 465.99 | 1 | 1 |
| Niger-Congo         | Nilo-Saharan        | Siberian            | 466.07 | 1 | 1 |

|                     |                     |                     |        |   |   |
|---------------------|---------------------|---------------------|--------|---|---|
| Berber              | Arabian             | Niger-Congo         | 466.10 | 1 | 1 |
| Southern European   | Kalash              | Niger-Congo         | 466.76 | 1 | 1 |
| Niger-Congo         | Pygmy               | Native American     | 466.95 | 1 | 1 |
| Southeast Asian     | Native American     | Niger-Congo         | 467.66 | 1 | 1 |
| Chinese             | Northern European   | Niger-Congo         | 468.66 | 1 | 1 |
| Levantine-Caucasian | Arabian             | Chinese             | 469.93 | 1 | 1 |
| Khoisan             | Nilo-Saharan        | Northern European   | 470.31 | 1 | 1 |
| Levantine-Caucasian | Kalash              | Khoisan             | 470.52 | 1 | 1 |
| Southern European   | Arabian             | Nilo-Saharan        | 470.77 | 1 | 1 |
| Kalash              | Northern European   | Khoisan             | 470.89 | 1 | 1 |
| Berber              | Northern European   | Niger-Congo         | 471.49 | 1 | 1 |
| Japanese            | Chinese             | Arabian             | 473.84 | 1 | 1 |
| Southeast Asian     | Japanese            | Southern European   | 475.82 | 1 | 1 |
| Southeast Asian     | Chinese             | Northern European   | 476.16 | 1 | 1 |
| Berber              | Arabian             | Khoisan             | 476.77 | 1 | 1 |
| Southern European   | Northern European   | Melanesian          | 477.05 | 1 | 1 |
| Chinese             | Indian              | Niger-Congo         | 479.33 | 1 | 1 |
| Berber              | Levantine-Caucasian | Niger-Congo         | 480.10 | 1 | 1 |
| Native American     | Siberian            | Niger-Congo         | 480.26 | 1 | 1 |
| Chinese             | Indian              | Khoisan             | 481.16 | 1 | 1 |
| Pygmy               | Nilo-Saharan        | Southern European   | 481.55 | 1 | 1 |
| Chinese             | Siberian            | Nilo-Saharan        | 483.60 | 1 | 1 |
| Chinese             | Northern European   | Khoisan             | 484.13 | 1 | 1 |
| Southeast Asian     | Japanese            | Nilo-Saharan        | 484.62 | 1 | 1 |
| Levantine-Caucasian | Kalash              | Niger-Congo         | 485.16 | 1 | 1 |
| Japanese            | Chinese             | Pygmy               | 485.26 | 1 | 1 |
| Kalash              | Northern European   | Niger-Congo         | 485.35 | 1 | 1 |
| Southern European   | Indian              | Niger-Congo         | 486.29 | 1 | 1 |
| Southeast Asian     | Chinese             | Levantine-Caucasian | 486.65 | 1 | 1 |
| Japanese            | Native American     | Khoisan             | 487.53 | 1 | 1 |
| Berber              | Northern European   | Khoisan             | 490.37 | 1 | 1 |
| Southern European   | Indian              | Khoisan             | 491.79 | 1 | 1 |
| Pygmy               | Nilo-Saharan        | Chinese             | 493.04 | 1 | 1 |
| Khoisan             | Niger-Congo         | Native American     | 494.57 | 1 | 1 |
| Berber              | Levantine-Caucasian | Khoisan             | 494.63 | 1 | 1 |
| Niger-Congo         | Pygmy               | Levantine-Caucasian | 495.24 | 1 | 1 |
| Khoisan             | Nilo-Saharan        | Southern European   | 495.73 | 1 | 1 |
| Khoisan             | Pygmy               | Levantine-Caucasian | 496.40 | 1 | 1 |
| Niger-Congo         | Nilo-Saharan        | Arabian             | 496.57 | 1 | 1 |
| Southeast Asian     | Siberian            | Khoisan             | 496.69 | 1 | 1 |
| Southern European   | Arabian             | Chinese             | 496.91 | 1 | 1 |
| Levantine-Caucasian | Northern European   | Nilo-Saharan        | 497.05 | 1 | 1 |
| Levantine-Caucasian | Indian              | Niger-Congo         | 498.34 | 1 | 1 |
| Southern European   | Levantine-Caucasian | Nilo-Saharan        | 499.73 | 1 | 1 |
| Levantine-Caucasian | Indian              | Khoisan             | 502.42 | 1 | 1 |
| Levantine-Caucasian | Northern European   | Chinese             | 502.59 | 1 | 1 |
| Indian              | Northern European   | Niger-Congo         | 507.12 | 1 | 1 |
| Japanese            | Native American     | Niger-Congo         | 510.20 | 1 | 1 |
| Indian              | Northern European   | Khoisan             | 511.04 | 1 | 1 |
| Khoisan             | Niger-Congo         | Levantine-Caucasian | 512.48 | 1 | 1 |
| Chinese             | Native American     | Khoisan             | 515.08 | 1 | 1 |

|                     |                     |                     |        |   |   |
|---------------------|---------------------|---------------------|--------|---|---|
| Khoisan             | Pygmy               | Northern European   | 515.23 | 1 | 1 |
| Niger-Congo         | Pygmy               | Northern European   | 517.21 | 1 | 1 |
| Southern European   | Berber              | Niger-Congo         | 517.82 | 1 | 1 |
| Southeast Asian     | Siberian            | Niger-Congo         | 518.23 | 1 | 1 |
| Southern European   | Berber              | Khoisan             | 518.99 | 1 | 1 |
| Khoisan             | Nilo-Saharan        | Chinese             | 520.15 | 1 | 1 |
| Southern European   | Northern European   | Nilo-Saharan        | 523.56 | 1 | 1 |
| Southern European   | Levantine-Caucasian | Chinese             | 526.28 | 1 | 1 |
| Niger-Congo         | Nilo-Saharan        | Southeast Asian     | 526.41 | 1 | 1 |
| Southeast Asian     | Chinese             | Nilo-Saharan        | 530.47 | 1 | 1 |
| Niger-Congo         | Nilo-Saharan        | Melanesian          | 531.84 | 1 | 1 |
| Niger-Congo         | Nilo-Saharan        | Japanese            | 532.05 | 1 | 1 |
| Southern European   | Northern European   | Chinese             | 532.75 | 1 | 1 |
| Japanese            | Chinese             | Northern European   | 533.02 | 1 | 1 |
| Southeast Asian     | Chinese             | Southern European   | 536.64 | 1 | 1 |
| Khoisan             | Niger-Congo         | Northern European   | 537.18 | 1 | 1 |
| Khoisan             | Pygmy               | Southern European   | 537.65 | 1 | 1 |
| Chinese             | Native American     | Niger-Congo         | 544.21 | 1 | 1 |
| Japanese            | Chinese             | Levantine-Caucasian | 544.26 | 1 | 1 |
| Arabian             | Northern European   | Khoisan             | 544.94 | 1 | 1 |
| Niger-Congo         | Pygmy               | Southern European   | 545.05 | 1 | 1 |
| Khoisan             | Pygmy               | Chinese             | 546.22 | 1 | 1 |
| Japanese            | Siberian            | Khoisan             | 546.68 | 1 | 1 |
| Niger-Congo         | Pygmy               | Chinese             | 556.36 | 1 | 1 |
| Levantine-Caucasian | Arabian             | Khoisan             | 556.83 | 1 | 1 |
| Arabian             | Northern European   | Niger-Congo         | 562.11 | 1 | 1 |
| Niger-Congo         | Nilo-Saharan        | Native American     | 566.99 | 1 | 1 |
| Khoisan             | Niger-Congo         | Southern European   | 567.40 | 1 | 1 |
| Chinese             | Siberian            | Khoisan             | 572.01 | 1 | 1 |
| Southern European   | Arabian             | Khoisan             | 575.57 | 1 | 1 |
| Southeast Asian     | Japanese            | Khoisan             | 577.47 | 1 | 1 |
| Levantine-Caucasian | Arabian             | Niger-Congo         | 578.60 | 1 | 1 |
| Japanese            | Siberian            | Niger-Congo         | 584.59 | 1 | 1 |
| Niger-Congo         | Nilo-Saharan        | Levantine-Caucasian | 585.48 | 1 | 1 |
| Khoisan             | Niger-Congo         | Chinese             | 594.61 | 1 | 1 |
| Japanese            | Chinese             | Southern European   | 596.86 | 1 | 1 |
| Japanese            | Chinese             | Nilo-Saharan        | 599.40 | 1 | 1 |
| Southern European   | Arabian             | Niger-Congo         | 611.10 | 1 | 1 |
| Niger-Congo         | Nilo-Saharan        | Northern European   | 614.69 | 1 | 1 |
| Chinese             | Siberian            | Niger-Congo         | 616.72 | 1 | 1 |
| Southeast Asian     | Japanese            | Niger-Congo         | 617.62 | 1 | 1 |
| Levantine-Caucasian | Northern European   | Khoisan             | 617.78 | 1 | 1 |
| Southern European   | Levantine-Caucasian | Khoisan             | 618.55 | 1 | 1 |
| Southeast Asian     | Chinese             | Khoisan             | 632.56 | 1 | 1 |
| Southern European   | Northern European   | Khoisan             | 638.35 | 1 | 1 |
| Niger-Congo         | Nilo-Saharan        | Southern European   | 647.37 | 1 | 1 |
| Levantine-Caucasian | Northern European   | Niger-Congo         | 648.81 | 1 | 1 |
| Southern European   | Levantine-Caucasian | Niger-Congo         | 655.65 | 1 | 1 |
| Niger-Congo         | Nilo-Saharan        | Chinese             | 674.73 | 1 | 1 |
| Japanese            | Chinese             | Khoisan             | 677.52 | 1 | 1 |
| Southern European   | Northern European   | Niger-Congo         | 684.10 | 1 | 1 |

|                 |         |             |        |   |   |
|-----------------|---------|-------------|--------|---|---|
| Southeast Asian | Chinese | Niger-Congo | 685.55 | 1 | 1 |
| Japanese        | Chinese | Niger-Congo | 747.80 | 1 | 1 |
